# Supplementary material for: Human nonsense mutations in primary hyperammonemia – Analysis of publicized patient mutations and variations in general populations in eight disease-causing genes
Source: Research Square preprint supplement (doi:10.21203/rs.3.rs-3090477/v1), 2023-06-23
Supplement: Supplementary file 1 [file 06698caf1d1c56fee4500bec.xlsx]

## Sheet: Dataset1 Locations of nonsense 
Dataset 1 Locations of nonsense mutations and variants in eight genes causing human primary hyperammonemia
	Mutation and Location a)				Clinical data b)					Description in Databases c)				jMorp JPN			gnomAD Broad Institute					Remarks for case-counting
code d)	codon	cDNA	protein	GRCh38	onset e)	country-ethnicity f)	family	case	reference	population study g)	HGMD	ClinVar	dbSNP	8.3K	14K	38K	AFR	AMR	EAS	NFE	Other
NAGS	100	c.299C>A	p.Ser100* _amber	chr17:44004962			NA	NA		gnomAd v3.1.2 AFR			rs764150659 A=0.00000				4.8e-05
NAGS	123	c.369G>A	p.Trp123* _opal	chr17:44005032			NA	NA		gnomAd v3.1.2 AFR			rs1457207409 A=0.00000				2.4e-05
NAGS	126	c.376C>T	pGln126* _amber	chr17:44005039			NA	NA		jMorp38K						1.3e-05
NAGS	240	c.719C>A	p.Ser240* _amber	chr17:44006041			NA	NA		gnomAd v3.1.2 AFR			rs781031762 A=0.00000				2.4e-05
NAGS	247	c.739C>T	p.Gln247* _amber	chr17:44006061			NA	NA		gnomAd v3.1.2 ASJ			rs748875458 T=0.00007								ASJ 0.000867
NAGS-01	263	c.787G>T	p.Glu263* _amber	chr17:44006109	neonatal	IN	1	1	Bijarnia-Mahay 2018		CM1814165	ND	ND
NAGS-02	324	c.971G>A	p.Trp324* _amber	chr17:44006584	neonatal (16h-2d) neonatal (2d 4d) neonatal (≤3d)	US-Hispanic [3] DE-Turkish [2] NO	4	6	Caldovic 2003 Gessler 2010 Reigstad 2017		CM030977	2428; pathogenic	rs104894604 A=0.0000
NAGS-03	331	c.991C>T	p.Gln331* _amber	chr17:44006604	neonatal neonatal	ES+CH [2] IN	2	3	Sancho-Vaello 2016 Bijarnia-Mahay 2018		CM167133	ND	rs1445639047 T=0.000009 Asian 0.00004
NAGS-04	422	c.1264G>T	p.Glu422* _amber	chr17:44007490	ND	ES+CH	1	1	Sancho-Vaello 2016		CM167134	ND	rs771540094 T=0.000008 Euro. 0.00001
NAGS	424	c.1272C>G	p.Tyr424* _amber	chr17:44007594			NA	NA		gnomAd v3.1.2 NFE			rs1214956593 A=0.00000 G=0.00003							1.5e-05
NAGS	473	c1419G>A	p.Trp473* _opal	chr17:44007741			NA	NA		gnomAd v3.1.2 NFE			rs1039703404 A=0.00000							1.5e-05
NAGS	496	c1486A>T	p.Lys496* _amber	chr17:44008482			NA	NA		gnomAd v3.1.2 NFE			rs1171508087 T=0.0002							1.5e-05
NAGS-05	498	c.1494G>A	p.Trp498* _opal	chr17:44008490	neonatal	ES+CH	1	1	Sancho-Vaello 2016		CM167136	ND	ND
CPS1-01	44	c.130C>T	p.Gln44* _amber	chr2:210573301	ND neonatal (3d 1d)	JP JP [2]	3	3	Ihara 1999 Kurokawa 2007		HM971508	2420; pathogenic	rs121912593 T=0.00000
CPS1-02	89	c.267C>G	p.Tyr89* _amber	chr2:210576376	ND	CH	1	1	Häberle 2011		CM114392
CPS1-03	140	c.420C>A	p.Tyr140* _ochre	chr2:210577459	neonatal	US	1	1	Eeds 2006	gnomAd v3.1.2 NFE	CM063934	1361235; pathogenic	rs772576138 A=0.00000 *T=0.00000							2.9e-05
CPS1-04	188	c.562C>T	p.Gln188* _amber	chr2:210582650	neonatal (4d)	KR	1	1	Choi 2017	jMorp14K38K	CM170029				4e-05	1.3e-05
CPS1-05	238	c.712C>T	p.Arg238* _opal	chr2:210590106	neonatal (1d)	DE- Iranian	1	1	Häberle 2003		CM030818	558166; likely pathogenic	rs761225695 T=0.00005 Euro. 0.00006
CPS1	318	c.952C>T	p.Gln318* _amber	chr2:210591835		JP	NA	NA		jMorp8.3K-38K	ND			0.0001	4e-05	1.3e-05
CPS1-06	335	c.1003C>T	p.Gln335* _amber	chr2:210591886	neonatal	JP	1	1	Kido 2021		CM2112794	842852; pathogenic
CPS1-07	375	c.1123C>T	p.Gln375* _amber	chr2:210592915	neonatal (3d)	JP	1	1	Aoshima 2001		CM012912
CPS1	429	c.1285G>T	p.Gly429* _opal	chr2:210595508			NA	NA		[jMorp38K]						1.3e-05
CPS1-08	430	c.1289C>G	p.Ser430* _opal	chr2:210595512	neonatal (1d) neonatal (2d, 3d, treated from birth)	PL AT-Polish [3]	2	4	Pronicka 2016 Rokicki 2017	POL400 0.0014	CM1610034
CPS1	440	c.1318G>T	p.Glu440* _ochre	chr2:210591835		JP	NA	NA		jMorp8.3K-38K	ND			0.0001	4e-05	1.3e-05
CPS1-09	478	c.1432C>T	p.Gln478* _ochre	chr2:210599444	late	US	1	1	Eeds 2006		CM063929	1069202; pathogenic
CPS1-10	539	c.1615G>T	p.Glu539* _amber	chr2:210600620	ND	CH	1	1	Häberle 2011		CM114393
CPS1-11	548	c.1642C>T	p.Gln548* _amber	chr2:210600647	neonatal (2d)	MY	1	1	Ali 2016		CM1510934
CPS1-12	569	c.1706C>A	p.Ser569* _amber	chr2:210600711	nenonatal	IL	1	1	Staretz-Chacham 2020		CM219602											Pt40 heterozygote with p.Arg638*
CPS1-13	590	c.1770T>G	p.Tyr590* _amber	chr2:210602264	ND	CH	1	1	Häberle 2011		CM114394	1321400; pathogenic
CPS1-14	638	c.1912C>T	p.Arg638* _opal	chr2:210605177	neonatal	IL	1	1	Staretz-Chacham 2020		CM219601	544151; pathogenic	rs759201450 T=0.0000									Pt40 heterozygote with p.Ser569*
CPS1	644	c.1932T>A	p.Cys644* _opal	chr2:210605197			NA	NA		gnomAd v3.1.2 NFE	CM219601	984186; likely pathogenic	rs1251623714 *A=0.00000							1.5e-05
CPS1-15	721	c.2161C>T	p.Arg721* _opal	chr2:210606910	neonatal (2d)	DE- Indian CN	2	2	Häberle 2003 Dai 2021		CM036035	554027; pathogenic/likely pathogenic	rs202107577 *A=0.00000 T=0.00000
CPS1-16	787	c.2359C>T	p.Arg787* _opal	chr2:210608527	neonatal (3d, 2d)	DE JP [2] JP JP [2]	6	6	Rapp 2001 Kurokawa 2007 Sugiyama 2020 Kido 2021	jMorp14K38K gnomAd v3.1.2 NFE	CM071660	2426; pathogenic	rs121912596 T=0.00000	0.0001	7e-05	3.9e-05				2.9e-05		Kurokawa2007 2 Pts heterozygote with p.Tyr1031*
CPS1-17	832	c.2494G>T	p.Glu832* _ochre	chr2:210612219	ND	CH	1	1	Makris 2021		CM2116697
CPS1	872	c.2616C>G	p.Tyr872* _amber	chr2:210616470			NA	NA		[jMorp38K]						1.3e-05
CPS1	930	c.2788G>T	p.Glu930* _amber	chr2:210637802			NA	NA		gnomAd v3.1.2 AFR			rs1424820114 T=0.00007 African 0.0003				2.4e-05
CPS1-18	953	c.2858C>A	p.Ser953* _ochre	chr2:210639178	neonatal	JP	1	1	Kido 2021	jMorp14K38K	CM2112797				4e-05	1.3e-05
CPS1-19	965	c.2893C>T	p.Gln965* _amber	chr2:210639213	ND	CH	1	1	Häberle 2011		CM114395
CPS1-20	966	c.2896G>T	p.Glu966* _amber	chr2:210639996	neonatal (3d)	CN	1	1	Yan 2019		CM1911251
CPS1-21	1031	c.3093C>A	p.Tyr1031* _ochre	chr2:210642617	neonatal (2d) neonatal	JP JP	2	2	Kurokawa 2007 Kido 2021	jMorp38K	CM071669					1.3e-05						Pts heterozygote with p.Arg787*
CPS1-22	1033	c.3097C>A	p.Glu1033* _ochre	chr2:210642621	adult (42y)	Fr	1	1	Toquet 2021		CM2121560
CPS1-23	1046	c.3136C>T	p.Gln1046* _amber	chr2:210642660	neonatal (2d)	AT-Italian	1	1	Rokicki 2017	gnomAd v3.1.2 NFE	CM1719732									1.5e-05
CPS1-24	1106	c.3317G>A	p.Trp1106* _amber	chr2:210648038	ND	CH	1	1	Häberle 2011		CM114397
CPS1-25	1127	c.3380T>A	p.Leu1127* _amber	chr2:210648516	ND	CH	1	1	Isler 2019		CM204386	1400087; pathogenic
CPS1-26	1174	c.3520C>T	p.Arg1174* _opal	chr2:210654064	ND neonatal (3d, 4d) neonatal (2d)	CH CH [2] CN	4	4	Häberle 2011 Kretz 2012 Liu 2021	jMorp8.3K-38K	CM114398	1076647; pathogenic	rs756337473 *A=0.00000 T=0.00005 Euro. T=0.00006	0.0001	4e-05	2.6e-05
CPS1-27	1259	c.3775A>T	p.Arg1259* _opal	chr2:210660503	neonatal	CH	1	1	Isler 2019		CM204357
CPS1-28	1262	c.3784C>T	p.Arg1262* _opal	chr2:210660512	late (13y) neonatal neonatal (2d) perineonatal (1m) neonatal (1d) neonatal (1d)	JP US [2] JP JP IT CN	7	8	Wakutani 2004 Eeds 2006 Kurokawa 2007 Ono 2009 Funghini 2012 Zhou 2020	jMorp8.3K-38K gnomAd v3.1.2 NFE	CM042962	552571; pathogenic	rs1414143303 T=0.00000	0.0001	0.00011	0.000168				1.5e-05
CPS1-29	1315	c.3945G>A	p.Trp1315* _opal	chr2:210663140	infancy (11m12d)	CN	1	1	Fan 2019		CM1920025
CPS1-30	1318	c.3953T>A	p.Leu1318* _amber	chr2:210663148	neonatal (<5d, 1d)	IT	2	2	Funghini 2012		CM120166	997859; pathogenic	rs1700979727
CPS1	1368	c.4102C>T	p.Gln1368* _ochre	chr2:210674902			NA	NA		gnomAd v3.1.2 AFR	ND		rs1180519617 T=0.00000 African 0.00002				2.4e-05
CPS1	1397	c.4191G>A	p.Trp1397* _opal	chr2:210675757			NA	NA		gnomAd v3.1.2 AFR	ND						2.4e-05
CPS1-31	1410	c.4229G>A	p.Trp1410* _amber	chr2:210675795	Referred at age 22	CH	1	1	Kretz 2012		CM125126
CPS1	1413	c.4237C>T	p.Gln1413* _ochre	chr2:210675803			NA	NA		gnomAd v3.1.2 EAS	ND									0.000193
OTC-01	9	c.26T>G	p.Leu9* _opal	chrX:38352722	neonatal (2d)	KR	1	1	Kim 2006		CM065362
OTC-02	23	c.67C>T	p.Arg23* _opal	chrX:38352763	neonatal female neonatal (2d) neonatal female (2.5y) female (ND)	US UK-F NO US CN-F US-F	6	6	Grompe 1991 Genet 2000 Lindemann 2008 Wilnai 2018 Lu 2020 Kumar 2021		CM910272	97292; pathogenic	rs72552300
OTC-03	32	c.94C>T	p.Gln32* _ochre	chrX:38367307	female (15m)	CH-F-Caucasian	1	1	Oppliger Leibundgut 1997		CM971092	97369; pathogenic	rs72554304
OTC-04	36	c.106C>T	p.Gln36* _amber	chrX:38367319	female neonatal, female	UK-F Fr, Fr-F	1 1	1 2	Genet 2000 Gobin-Limballe 2021		CM003028	97105; pathogenic	rs72554305 *G=0.00000
OTC-05	50	c.148G>T	p.Gly50* _opal	chrX:38367361	female (8m) female	Fr-F Fr-F	1 1	1 1	Feldmann 1992 Gobin-Limballe 2021		CM920533	11002; pathogenic	rs67486158 *A=0.00003
OTC-06	52	c.154G>T	p.Glu52* _ochre	chrX:38367367	female	US-F	1	1	McCullough 2000		CM001742	97119; pathogenic	rs66521141
OTC-07	58	c.174G>A	pTrp58* _opal	chrX:38367387	neonatal female (2y)	US CN-F	2	2	Yamaguchi 2006 Lu2020		CM063001	97127; pathogenic	rs72554322
OTC-08	69	c.205C>T	p.Gln69* _amber	chrX:38367418	female (some time 5m~5y)	ES-F	1	1	Climent 1999		CM993186	97133; pathogenic	rs72554326
OTC-09	71	c.211G>T	p.Gly71* _opal	chrX:38367424	female (9m)	ES-F	1	1	Arranz 2007		CM076370
OTC-10	72	c.214G>T	p.Glu72* _amber	chrX:38367427	neonatal	CN	1	1	Zhang 2019		CM1923565
OTC-11	73	c.219T>G	p.Tyr73* _amber	chrX:38369798	neonatal	CZ	1	1	Storkanova 2012		CM1213175
OTC-12	78	c.232C>T	p.Gln78* _ochre	chrX:38369811	neonatal	US	1	1	Yamaguchi 2006		CM062988	97139; pathogenic	rs72554330 *G=0.00000
OTC-13	82	c.245T>A	p.Leu82* _ochre	chrX:38369824	neonatal	US	1	1	Caldovic 2015		CM156769
OTC-14	82	c.245T>G	p.Leu82* _opal	chrX:38369824	female	US-F	1	1	McCullough 2000		CM001743	97142; pathogenic	rs72554335
OTC-15	92	c.274C>T	p.Arg92* _opal	chrX:38369853	neonatal female (4y etc) neonatal etc neonatal (6d) neonatal neonatal (3d) neonatal neonatal & female	US CH-F-Caucasian [2] UK[3] KR CZ IN CN Fr [2family 3]	12	13	Grompe 1991 Oppliger Leibundgut 1997 Genet 2000 Kim 2006 Storkanova 2012 Bijarnia-Mahay 2018 Yang 2020 Gobin-Limballe 2021		CM910276	97151; pathogenic	rs67418243
OTC-16	109	c.327T>A	p.Cys109* _opal	chrX:38381370	neonatal & female	Fr	1	2	Gobin-Limballe 2021		CM2125161	870327; pathogenic	rs2068375565
OTC-17	141	c.421C>T	p.Arg141* _opal	chrX:38401309	female (19m) neonatal neonatal (1d) neonatal (1d) female neonatal female	JP-F US JP CH UK-F IN Fr	7	7	Hata 1989 Grompe 1991 Matsuura 1994 Oppliger Leibundgut 1996 Genet 2000 Bijarnia-Mahay 2018 Gobin-Limballe 2021		CM890089	10988; pathogenic	rs67960011 T=0.000
OTC-18	143	c.429T>A	p.Tyr143* _ochre	chrX:38401317	female_unrecognized	EG-F	1	1	Mukhtar 2013		CM1313832	1072591; pathogenic
OTC-19	144	c.430A>T	p.Lys144* _ochre	chrX:38401318	female	US-F	1	1	Tuchman 1995		CM950874	97200; pathogenic	rs72556262 *G=0.00000
OTC-20	146	c.437C>A	p.Ser146* _ochre	chrX:38401325	neonatal	UK	1	1	Kingsmore 2022
OTC-21	146	c.437C>G	p.Ser146* _opal	chrX:38401325	neonatal ND	UK US	2	2	Genet 2000 Shchelochkov 2009		CM003031	97201; pathogenic	rs72556263
OTC-22	154	c.460G>T	p.Glu154* _ochre	chrX:38401348	neonatal	US	1	1	Grompe 1989		CM890090	10991; pathogenic	rs72556267
OTC-23	164	c.491C>A	p.Ser164* _ochre	chrX:38401379	neonatal female (4y)	CZ	1	2	Storkanova 2012		CM1213178
OTC-24	164	c.491C>G	p.Ser164* _opal	chrX:38401379	neonatal (6d)	JP	1	1	Hoshide 1993		CM930526	97220; pathogenic	rs72556274 (C>G / C>T)
OTC-25	167	c.501C>A	p.Tyr167* _ochre	chrX:38401389	neonatal (2d)	ES	1	1	García-Pérez 1995		CM950877	97222; pathogenic	rs66564822 *T=0.00000
OTC-26	167	c.501C>G	p.Tyr167* _amber	chrX:38401389	neonatal (2d)	JP	1	1	Shimadzu 1998		CM981415	97223; pathogenic	rs66564822 *T=0.00000
OTC-27	180	c.538C>T	p.Gln180* _amber	chrX:38401426	neonatal	US	1	1	Caldovic 2015		CM156771
OTC-28	193	c.578G>A	p.Trp193* _amber	chrX:38403655	neonatal (7d)	JP	1	1	Shimadzu 1998		CM981416	97254; pathogenic	rs72556299
OTC-29	193	c.579G>A	p.Trp193* _opal	chrX:38403655	neonatal (20d)	CN	1	1	Lu 2020		CM2025469
OTC-30	210	c.628A>T	p.Lys210* _ochre	chrX:38403705	ND	CH	1	1	Makris 2021		CM2116707	97200; pathogenic	rs72556262 *G=0.00000
OTC	212	c.634G>T	p.Gly212* _opal	ChrX:38403711			NA	NA			ND	419686; pathogenic	rs772049322 *A=0.00000
OTC-31	224	c.670G>T	p.Glu224* _amber	chrX:38408748	ND	US	1	1	Shchelochkov 2009		CM0910708
OTC-32	234	c.700G>T	p.Glu234* _amber	chrX:38408778	neonatal	US	1	1	Yamaguchi 2006		CM062948	97294; pathogenic	rs72558430
OTC-33	235	c.703C>T	p.Gln235* _amber	chrX:38408781	female (1.5y)	CN-F	1	1	Lu 2020		CM2025475
OTC-34	256	c.766G>T	p.Gly256* _opal	chrX:38408924	female	Fr-F	1	1	Gobin-Limballe 2021		CM2125162	870326; pathogenic	rs2068529566
OTC-35	265	c.794G>A	p.Trp265* _amber	chrX:38408952	late (4.3y)	CN	1	1	Lu 2020		CM2025471
OTC-36	265	c.795G>A	p.Trp265* _opal	chrX:38408953	neonatal	US	1	1	Yamaguchi 2006		CM063000	97331; pathogenic	rs72558447
OTC-37	270	c.808C>T	p.Gln270* _ochre	chrX:38408966	neonatal	US	1	1	McCullough 2000		CM001753	97335: pathogenic	rs72558451 *G=0.00000
OTC	271	c.811G>T	p.Glu271* _ochre	ChrX:38408969			NA	NA			ND					0.000257
OTC	273	c.817G>T	p.Glu273* _amber	ChrX:38408975			NA	NA			ND					0.000136
OTC-38	275	c.823A>T	p.Lys275* _ochre	chrX:38408981	neonatal	JP	1	1	Kido 2021		CM2112782
OTC-39	279	c.835C>T	p.Gln279* _amber	chrX:38408993	neonatal	US IN	2	2	McCullough 2000 Bijarnia-Mahay 2018		CM001754	97341; pathogenic	rs72558455
OTC-40	285	c.853C>T	p.Gln285* _amber	chrX:38409011	female (2y)	CZ-F	1	1	Storkanova 2012		CM1213180
OTC-41	298	c.894G>A	p.Trp298* _opal	chrX:38411888	female (late)	JP-F	1	1	Kido 2021		CM2112784
OTC-42	306	c.916A>T	p.Arg*306 _opal	chrX:38411910	unknown	US	1	1	Shchelochkov 2009		CM0910709
OTC-43	310	c.928G>T	p.Glu310* _ochre	chrX:38411922	neonatal female (3y5m)	US IT-F	2	2	Reish1993 Giorgi2000		CM930533	97361; pathogenic	rs72558466
OTC-44	320	c.958C>T	p.Arg*320 _opal	chrX:38411952	female (3y10m) female (9m) neonatal (4d) etc neonatal neonatal neonatal (3d) etc female (13m) neonatal neonatal & female neonatal	US-F KR-F JP [2] UK US KR [2] US-F IL Fr [4family 6] JP	15	17	Demmer 1996 Yoo1996 Matsuda 1997 Genet 2000 McCullough 2000 Kim 2006 Rajabi2017 Staretz-Chacham 2020 Gobin-Limballe 2021 Suzuki 2022		CM961061	97371; pathogenic	rs72558473 *A=0.00000
OTC-45	321	c.962C>A	p.Ser321* _ochre	ChrX:38411956	neonatal	US	1	1	Tuchman 2002		CM020179	97373; pathogenic	rs72558475
OTC-46	328	c.982G>T	p.Glu328* _ochre	ChrX:38411976	neonatal	US	1	1	Yamaguchi 2006		CM062947	97375; pathogenic	rs72558477
OTC-47	331	c.991A>T	p.Lys331* _amber	chrX:38411985	female	US-F	1	1	Yamaguchi 2006		CM062941	97377; pathogenic	rs72558479
OTC-48	332	c.995G>A	p.Trp332* _amber	chrX:38411989	neonatal female (68y)	US DE-F	2	2	McCullough 2000 Marquetand 2020		CM062998	97379; pathogenic	rs72558481
OTC-49	332	c.996G>A	p.Trp332* _opal	chrX:38411990	neonatal (2d) female (29y)	JP Fr-F	2	2	Matsuura 1994 Toquet 2021		CM941125	97380; pathogenic	rs72558482
OTC-50	348	c.1042C>T	p.Gln348* _amber	chrX:38421059	perinatal (F)	CH-F-Caucasian	1	1	Oppliger Leibundgut 1997		CM971117	97103; pathigenic	rs72558494
ASS1-01	27	c.79C>T	p.Gln27* _ochre	chr9:130452307	neonatal	CH-Arabic Argentina[2]	3	3	Diez-Fernandez 2017		CM175125
ASS1-02	34	c.102T>G	p.Tyr34* _amber	chr9:130452330	ND	GE	1	1	Zielonka 2019		CM1926122
ASS1-03	97	c.291C>A	p.Cys97* _opal	chr9:130458517	neonatal_NBS	CH-Switzerland	1	1	Diez-Fernandez 2017		CM175129	555071; likely pathogenic	rs1554982847
ASS1-04	138	c.412C>T	p.Gln138* _amber	chr9:130464159	neonatal	CH-Germany	1	1	Diez-Fernandez 2017		CM175133	370237; likely pathogenic	rs1057516339
ASS1-05	163	c.489C>A	p.Tyr163* _ochre	chr9:130466793	neonatal NBS	CH-France JP	2	2	Diez-Fernandez 2017 Kido 2021		CM175134	1071055; pathogenic	rs377319610 *T=0.00006 0.0003 African
ASS1-06	190	c.570C>A	p.Tyr190* _ochre	chr9:130471488	neonatal (7d)	IN	1	1	Bijarnia-Mahay 2018		CM1814150
ASS1-07	275	c.823G>T	p.Gly275* _opal	chr9:130480434	prenatal_fetus	NL	1	1	Kleijer2006		CM068351	557645; likely pathogenic	rs1554723625
ASS1-08	279	c.835C>T	p.Arg279* _opal	chr9:130480446	ND[2] late (3y) NBS neonatal	TW-USA[2] JP US US	5	5	Li 2001 Gao 2003 Dimmock 2006 Miller 2014	gnomAd v3.1.2 AFR NFE Capalbo2019	CM012587	6333; pathogenic/ likely pathogenic	rs121908645 T=0.000052 Euro. 0.000055				2.4e-05			1.5e-05
ASS1-09	282	c.846C>A	p.Tyr282* _ochre	chr9:130489340	severe developmental delays	US-Hispanic	1	1	Ruxmohan 2021	gnomAd v3.1.2 AFR	ND		rs549085827 A=0.00000 T=0.00000				0.000121
ASS1-10	311	c.931C>T	p.Gln311* _ochre	chr9:130489425	neonatal	DE- Italy	1	1	Engel2009		CM091426	552773; pathogenic/ likely pathogenic	rs1301613270 *G=0.000004
ASS1-11	344	c.1030C>T	p.Arg344* _opal	chr9:130494926	ND	DE-Germany	1	1	Engel2009	gnomAd v3.1.2 NFE	CM091427		rs786204537 T=0.00000							1.5e-05
ASS1-12	357	c.1069C>T	p.Gln357* _amber	chr9:130494965	neonatal	US	1	1	Miller2014	gnomAd v3.1.2 AFR	CM146380	528373; pathogenic/ likely pathogenic	rs756859126 T=0.00007 African 0.0003 African Amer. 0.0004				9.7e-05
ASS1	373	c.1117G>T	p.Glu373* _amber	chr9:130495013			NA	NA		gnomAd v3.1.2 NFE Hou2020 Dataset sheet3 1308	CM2016781		rs1453708640 T=0.00000							1.5e-05
ASS1-13	380	c.1138C>T	p.Gln380* _amber	chr9:130499515	neonatal (4d)	GR	1	1	Augoustides-Savvopoulou 2000		CM031632,	188776; likely pathogenic	rs786204460
ASL-01	62	c.184C>T	p.Gln62* _amber	chr7:66081974	early	GE	1	1	Zielonka 2020		CM205117
ASL	69	c.205A>T	p.Lys69* _amber	chr7:66081995			NA	NA		gnomAD v3.1.2 NFE	ND		rs1464138269 T=0.00000							1.5e-05
ASL-02	98	c.292G>T	p.Glu98* _amber	chr7:66082880	tested at 2y	CH-US	1	1	Balmer 2014		CM141214	553428; pathogenic/ likely pathogenic	rs770375565 T=0.0001 Other 0.0004
ASL-03	110	c.328G>T	p.Gly110* _opal	chr7:66082916	ND	CH	1	1	Balmer 2014		CM141216
ASL-04	116	c.346C>T	p.Gln116* _amber	chr7:66082934	ND[3] neonatal	DE- Arabic [3] CH	4	4	Linnebank2002 Balmer 2014		CM022314	21254; pathogenic	rs367543006
ASL	124	c.371G>A	p.Trp124* _amber	chr7:66083099			NA	NA		jMorp 38K	ND	984301; lkely pathogenic	rs1786558070			1.3e-05
ASL-05	127	c.379C>T	p.Gln127* _amber	chr7:66083107	ND	SA	1	1	Monies 2019		CM1924927	972006; likely pathogenic
ASL-06	137	c.411G>A	p.Trp137* _opal	chr7:66083139	NBS 1m	KR	1	1	Kim 2018		CM1811241
ASL-07	182	c.544C>T	p.Arg182* _opal	chr7:66086763	neonatal neonatal neonatal late neonatal	IT [2] SA CH-US[3]+Belgian UK CN	9	9	Trevisson 2007, 2009 Imatiaz 2010 Balmer 2014 Baruteau 2017 Zhang 2019	jMorp14K38K gnomAD v3.1.2 NFE	CM072864	92362; pathogenic	rs398123126 T=0.00008 Euro. 0.00011		4e-05	5.2e-05				0.000103
ASL-08	213	c.637C>T	p.Arg213* _opal	chr7:66087368	neonatal(4d) ND neonatal[2]late2y late (16m) neonatal	IT CH-USA [2] IN [3] CN JP	8	8	Trevisson 2007 Balmer 2014 Bijarnia-Mahay 2018 Zhao 2019 Kido 2021		CM072865	426366; pathogenic	rs761651320 T=0.000020
ASL-09	217	c.649C>T	p.Arg217* _opal	chr7:66087380	neonatal NBS[3 3] neonatal(4d)	CH-US[5]+Italian IN	7	7	Balmer 2014 Bijarnia-Mahay 2018	jMorp14K38K gnomAD v3.1.2 AMR NFE OTH	CM141233	203615; pathogenic	rs369879957 T=0.00007 Euro. 0.00009		4e-05	1.3e-05		6.6e-05		7.4e-05	Other 0.000479
ASL-10	245	c.735G>A	p.Trp245* _opal	chr7:66088823	NBS	CH-US	1	1	Balmer 2014		CM141239	552651; likely pathogenic	rs1554327573
ASL-11	344	c.1030C>T	p.Gln344* _amber	chr7:66089663	unknown	CH-US	1	1	Balmer 2014		CM141250
ASL-12	354	c.1060C>T	p.Gln354* _amber	chr7:66089693	neonatal(3d) [2] etc ND	SA [16] SA [15]	30	31	Al-Sayed 2005 Imatiaz 2010		CM055096	21253; pathogenic	rs367543005 T=0.002 Other 0.009
ASL-13	361	c.1081G>T	p.Gly361* _opal	chr7:66092024	ND	SA	1	1	Imatiaz 2010		CM101662
ASL	411	c.1231C>T	p.Gln411* _amber	chr7:66092644			NA	NA		jMorp8.3K-38K	ND			0.0001	4e-05	1.3e-05
ASL-14	428	c.1284G>A	p.Trp428* _opal	chr7:66092801	late	UK	1	1	Baruteau 2017		CM175248
ASL-15	430	c.1290C>A	p.Tyr430* _ochre	chr7:66092807	ND	CH-Greek	1	1	Balmer 2014		CM141256											Zielonka 2020 not included
ASL-16	437	c.1331T>A	p.Tyr437* _ochre	chr7:66092828	ND	CH-French	1	1	Balmer 2014		CM141259
ASL-17	437	c.1331T>G	p.Tyr437* _amber	chr7:66092828	ND	CN	1	1	Lin 2017		CM2013256	556889; likely pathogenic	rs932494060 *C=0.00000
ASL	450	c.1350G>A	p.Trp450* _opal	chr7:66092867			NA	NA		jMorp14K38K	ND				4e-05	1.3e-05
ASL-18	454	c.1360C>T	p.Gln454* _amber	chr7:66092877	neonatal	US	1	1	Barbosa 1991		CM910596	224979; pathogenic/ likely pathogenic	rs869312994
ASL-19	460	c.1378C>T	p.Gln460* _amber	chr7:66092895	NBS	CH-US	1	1	Balmer 2014		CM141262
ASL(!)	465	c.1395G>A	p.*amber465*_ochre	chr7:66092912			NA	NA		jMorp8.3K-38K				0.0002	0.00028	0.000142						nonsense to nonsense variant
ARG1+	- / 20+	c.58C>T ENST00000672233.1	p.Arg20* _opal	chr6:131547180			NA	NA		gnomAD v3.1.2 NFE										5.9e-05
ARG1-01	12	c.34G>T	p.Gly12* _opal	chr6:131573316	infancy (1y6m) NBS	CN CN	2	2	Wu 2013 Zhang 2017		CM137581
ARG1-02	21	c.61C>T	p.Arg21* _opal	chr6:131576666	infancy (1~23m) infancy (6m) etc. infancy (17m~4y) NBS childhood (7 13y)	PT [4] CA [2]-Iraqi, ND BR [5] PT [5] CH-Turkey [2]	18	18	Cardoso 1999 Jain-Ghai 2011 Carvalho 2012 Rodrigues 2014 Diez-Fernandez 2018	jMorp 14K38K gnomAD v3.1.2 NFE	CM993111	2397; pathogenic	rs104893944 T=0.00006 Euro. 0.00008		4e-05	3.9e-05				1.5e-05
ARG1-03	42	c.124G>T	p.Glu42* _ochre	chr6:131576729	NBS	CN	1	1	Zhang 2017		CM173304	ND	rs748744950 T=0.00000
ARG1-04	75	c.223A>T	p.Lys75* _ochre	chr6:131579203	NBS	US-Hispanic	2	2	Edwards 2009		CM962654	ND	ND
ARG1-05	122	c.365G>A	p.Trp122* _amber	chr6:131581278	infancy (<9m) infancy (24m) infancy (3m) infancy (30d)	JP BR DE- Arabic JP	4	4	Uchino 1992 Carvalho 2012 Amayreh 2014 Yokoi 2021	jMorp8.3K-38K gnomAD v3.1.2 AFR	CM920104	2390; pathogenic	rs104893947 T=0.000010 African 0.0002 African Amer. 0.0002	0.0001	4e-05	3.9e-05	4.8e-05
ARG1	186	c.556G>T	p.Glu186* _ochre	chr6:131582711			NA	NA		gnomAD v3.1.2 OTH											Other 0.000479
ARG1	199	c.596C>A20	p.Ser199* _ochre	Chr6:131583095			NA	NA		gnomAD v3.1.2 AMR								0.000131
ARG1-06	291	c.871C>T	p.Arg291* _opal	chr6:131583810	neonatal infancy (34d) infancy infancy (1y)	UK-German-French AT MY CH-France	4	4	Grody 1992 Scholl-Bürgi 2008 Mohseni 2014 Diez-Fernandez 2018	gnomAD v3.1.2 AFR NFE	CM920106	2388; pathogenic/ likely pathogenic	rs104893940 T=0.000060 Euro. 0.000060				4.8e-05			2.9e-05
SLC25A15-01	8	c.22C>T	p.Gln8* _amber	chr13:40793248	neonatal (4d)	UN	1	1	Wild 2018		CM190256	489127; pathogenic	rs1448259297 T=0.000008 Amer. 0.00006
SLC25A15-02	89	c.265C>T	p.Gln89* _amber	chr13:40799266	infancy (1y)	IT	1	1	Salvi 2001		CM013040	ND	ND
SLC25A15	174	c.521C>A	p.Ser174* _ochre	chr13:40807362			NA	NA		gnomAD v3.1.2 AFR	ND	650947; pathogenic	rs200873328 G=0.00000				2.4e-05
SLC25A15-03	179	c.535C>T	p.Arg179* _opal	chr13:40807376	infancy infancy (3y) etc. childhood neonatal etc. infancy~ (3m 7y)	JP JP [2] IT IT-Senegal, Morocco CN [2]	8	10	Tsujino 2000 Miyamoto 2001 Salvi 2001 Tessa 2009 Guan 2017	jMorp8.3K-38K gnomAD v3.1.2 AFR EAS NFE AMI	CM001338	5994; pathogenic	rs104894429 T=0.000038 Euro. 0.00001 Asian 0.0009 East Asian 0.0011	0.0002	0.00028	0.000245	2.4e-05		0.000384	1.5e-05	Amish 0.003297
SLC25A15	224	c.671G>A	p.Trp224* _amber	chr13:40808486			NA	NA		gnomAD v3.1.2 NFE	ND		rs1339837152 A=0.00000							1.5e-05
SLC25A15-04	238	c.712C>T	p.Gln238* _ochre	chr13:40808527	infancy (1y)	SE-Caucasian	1	1	Silfverberg 2018		CM1814006	ND	ND
SLC25A15-05	245	c.733A>T	p.Lys245* _ochre	chr13:40808548	infancy	IT-Algeria	1	2	Tessa 2009		CM092849	ND	ND
SLC25A15-06	275	c.823C>T	p.Arg275* _opal	chr13:40809584	Infancy~ (5m 3y)	JP	1	2	Torisu 2006	jMorp38K gnomAD v3.1.2 AMR Capalbo2019 carrier	CM065465	38403; likely pathogenic	rs202247807 T=0.00000		0.00004 (!yellow)	1.3e-05		0.00059
SLC25A13+	-/10+	c.29+ G>A XM_017011663	p.Trp10+ * _amber	chr7:96284794			NA	NA		gnomAd v3.1.2 NFE										1.5e-05
SLC25A13+	-/26+	c.76+ G>T XM_017011663	p.Glu26+ * _amber	chr7:96284747			NA	NA		jMorp38K						1.3e-05
SLC25A13+	-/63+	c.188+ G>A XM_017011663	p.Trp63+ * _amber	chr7:96284635			NA	NA					rs1370258878; T=0.00000
SLC25A13-01	16	c.46G>T	p.Glu16* _amber	chr7:96296921	CTLN2 NICCD NICCD (0m)	JP JP JP	3	3	Kobayashi 2003 Tabata 2008 Kido 2022		CM034749
SLC25A13-02	24	c.72C>G	p.Tyr24* _amber	chr7:96277336	NICCD	CN-Chinese	1	1	Song 2013		CM139585		rs1311945646
SLC25A13-03	43	c.127C>T	p.Arg43* _opal	chr7:96277281	NICCD (6w) etc.	US-French-Canadian	3	4	Dimmock 2009	gnomAD v3.1.2 EAS NFE {Huang2018 prostate adenoca. Excel S2B 488 68yM}	CM090576	ND	rs780525233 A=0.00000						0.000193	4.4e-05
SLC25A13-04	97	c.289C>T	p.Gln97* _amber	chr7:96234841	NICCD	CN	1	1	Fang 2021		CM212122
SLC25A13-05	150	c.448G>T	p.Glu150* _ochre	chr7:96208858	CTLN2 (adult)	CN-Japanese	1	1	Song 2013		CM139588
SLC25A13-06	159	c.475C>T	p.Gln159* _ochre	chr7:96193177	NICCD	CN CN	2	2	Lin 2016 Lin 2020		CM1111406	1070090; pathogenic
SLC25A13-07	165	c.493C>T	p.Gln165* _ochre	chr7:96193159	NICCD	CN	1	1	Lin 2016	Bylstra2019 Table2 1 carrier	CM1611007	590804; pathogenic	rs1562831765
SLC25A13-*	169	c.505C>T	p.Gln169* _ochre	chr7:96193147			NA	NA		{glioblastoma; Lu2015, Huang2018 Excel S2B 480 67yF_white}	CM1517782		rs779220022 A=0.000008
SLC25A13-08	184	c.550C>T	p.Arg184* _opal	chr7:96193102	NICCD NICCD	JP CN [3]	4	4	Kobayashi 2003 Lin 2016	gnomAD v3.1.2 NFE	CM034750	21515; pathogenic	rs80338716 A=0.000061 Euro. 0.000062							1.5e-05
SLC25A13-09	214	c.640C>T	p.Gln214* _ochre	chr7:96191223	NICCD (3m17d)	CN-Chinese	1	1	Wang 2015		CM1412492
SLC25A13-10	225	c.674C>A	p.Ser225* _amber	chr7:96191189	CTLN2 (adult) CTLN2 CTLN2 (24y) CTLN2 (adult) NICCD NICCD CTLN2 (74y) NICCD (1~10m) CTLN2 (62y)	JP [2] JP JP CN-Japanese JP JP [6] JP JP [20]	30	34	Kobayashi 1999 Tanaka 2002 Takahashi 2006 Song 2013 Togawa 2016 Hirayama 2018 Suzuki 2019 Kido 2022	jMorp8.3K-38K	CM991267	6004; pathogenic	rs80338719 A=0.00011 Euro. 0.00011 African 0.00012	0.0004	0.00025	0.000426
SLC25A13-11	259	c.775C>T	p.Gln259* _amber	chr7:96189654	NICCD NICCD	CN-Chinese CN	2	2	Song 2013 Lin 2016		CM113257	252920; pathogenic	rs746155190
SLC25A13-12	283	c.847G>T	p.Gly283* _opal	chr7:96189582	NICCD NICCD (1m)	CN-Chinese JP	2	2	Song 2011 Kido 2022		CM114197
SLC25A13-13	297	c.889G>T	p.Glu297* _ochre	chr7:96189338	NICCD	CN	1	1	Lin 2020		CM207696
SLC25A13-*	307	c.919G>T	p.Glu307* _ochre	chr7:96189308			NA	NA		{Deng2019 esophageal SCC}	CM1912809
SLC25A13-*	311	c.931C>T end of exon9	p.Gln311* _amber	chr7:96189296			NA	NA		{breast adenoca. Lu2015 Excel S3 519; Huang2018 Excel S2B 475 50yF_white}	CM1517783	ND	rs752281398
SLC25A13+	312+	c.934+ C>T	p.Gln312+ * _amber	chr7:96185014			NA	NA		gnomAD v3.1.2 AFR NFE {Huang2018 prostate adenoca. Excel S2B 486 75yM}		ND	rs767051127 A=0.00012 Euro. 0.00012				4.8e-05			0.000191
SLC25A13-14	319	c.955C>T	p.Arg319* _opal	chr7:96184990	NICCD NICCD NICCD (0m)	JP-Chinese, Hebei CN JP	3	3	Song 2008 Lin 2016 Kido 2022	gnomAD v3.1.2 NFE	CM087351	372748; pathogenic	rs763191789 A=0.00000							1.5e-05
SLC25A13-15	355	c.1063C>T	p.Arg355* _opal	chr7:96184391	NICCD (6w) etc.	US-French-Canadian	2	3	Dimmock 2009	gnomAD v3.1.2 NFE Capalbo2019 carrier	CM090577	449394; Pathogenic(2); Uncertain significance(1)	rs758827458 A=0.00007 Euro. 0.0001 *C=0.00000							1.5e-05
SLC25A13	359	c.1075C>T	p.Gln359* _ochre	chr7:96184379			NA	NA		gnomAD v3.1.2 SAS		ND	rs1794541339 A=0.00000								SAS 0.000207
SLC25A13-16	360	c.1078C>T	p.Arg360* _opal	chr7:96184376	NICCD NICCD NICCD NICCD NICCD NICCD (0~5m)	JP BG CN [3] JP CN JP [2]	9	9	Tabata 2008 Avdjieva-Tzavella 2014 Lin 2016 Togawa 2016 Fang 2021 Kido 2022	jMorp38K gnomAD v3.1.2 NFE	CM081806	21508; pathogenic/ likely pathogenic	rs80338721 A=0.000049 Euro. 0.000054			5.2e-05				2.9e-05
SLC25A13	391	c.1173T>G	p.Tyr391* _amber	chr7:96184281			NA	NA		gnomAD v3.1.2 NFE		ND	rs762925301 C=0.00000							1.5e-05
SLC25A13-17	397	c.1189C>T	p.Gln397* _amber	chr7:96171513	NICCD (1m)	JP-Taiwanese	1	1	Sheng 2006		CM068153
SLC25A13	442	c.1324C>T	p.Gln442* _amber	chr7:96146684			NA	NA		jMorp38K						1.3e-05
SLC25A13-18	461	c.1381G>T	p.Glu461* _ochre	chr7:96146627	NICCD	CN	1	1	Lin 2016		CM1611018	ND	rs1218598501 A=0.00000
SLC25A13-19	467	c.1399C>T	p.Arg467* _opal	chr7:96146609	NICCD NICCD	CN [5] CN	6	6	Lin 2016 Lin 2020	gnomAD v3.1.2 NFE	CM103907	939098; pathogenic	rs540149539 A=0.00000							1.5e-05
SLC25A13-20	549	c.1645C>T	p.Gln549* _amber	chr7:96121944	CTLN2 (adult)	CN-Japanese	1	1	Song 2013	jMorp8.3K-38K	CM139594		rs1364726997 8.3K A=0.00006	0.0001	0.00011	0.000142
SLC25A13-21	579	c.1736G>A	p.Trp579* _amber	chr7:96121853	NICCD	CN-Japanese	1	1	Song 2013		CM139595
SLC25A13-22	579	c.1737G>A	p.Trp579* _opal	chr7:96121852	NICCD	CN	1	1	Zhou2020		CM2017142
SLC25A13-23	588	c.1762C>T	p.Arg588* _opal	chr7:96121734	NICCD	CN	1	1	Lin 2020	gnomAD v3.1.2 NFE	CM207699	664925; pathogenic	rs1261058897 A=0.00000							1.5e-05
SLC25A13	590	c.1769C>A	p.Ser590* _ochre	chr7:96121727			NA	NA		Hou 2020 Dataset sheet3 1252	CM2016755
SLC25A13-24	601	c.1801G>T	p.Glu601* _ochre	chr7:96121695	NICCD (2m) NICCD CTLN2 (48y) NICCD (1~2m) FTTDCD (2y) CTLN2 (48y)	JP JP JP JP [4] JP JP	9	9	Hayasaka2012 Hirayama2018 Hayasaka2018 Kido 2022	jMorp8.3K-38K	CM020187	21513; pathogenic	rs80338727 *T=0.00000 8.3K A=0.00012	0.0001	0.00011	6.5e-05
SLC25A13-25	605	c.1813C>T	p.Arg605* _opal	chr7:96121683	CTLN2 (adult) hypoketotic hypoglycemia(1y) NICCD NICCD (1m) etc.	JP JP CN JP [3]	6	6	Yasuda 2000 Wada 2020 Fang 2021 Kido 2022	jMorp8.3K-38K gnomAD v3.1.2 SAS	CM003063,	21514; pathogenic	rs80338729 A=0.00000	0.0001	0.00011	6.5e-05					SAS 0.000830
SLC25A13-26	606	c.1817G>A	p.Trp606* _amber	chr7:96121679	NBS (infancy 35d)	KR	1	1	Kang 2015	jMorp14K38K	CM1517418				4e-05	9e-05
SLC25A13-*	619	c.1856C>G	p.Ser619* _opal	chr7:96121363			NA	NA		gnomAD v3.1.2 NFE {Huang2018 prostate adenoca. 78yM}	CM1827664	ND	rs1220401209							1.5e-05
