# Supplementary material for: Human nonsense mutations in primary hyperammonemia – Analysis of publicized patient mutations and variations in general populations in eight disease-causing genes
Source: Research Square preprint supplement (doi:10.21203/rs.3.rs-3090477/v1), 2023-06-23
Supplement: Supplementary file 2 [file 1683c0d2bec5b485cf41a44e.xlsx]

## Sheet: Dataset 2 Patient and mutations
Dataset 2 Patient and patient mutations a)
	Mutation and Location				Patient data										Laboratory data		Inheritance								Onset and outcome assignment g)
code	codon	cDNA	protein	another allele b)	onset c)	country-ethnicity	occurrenced)	case	family history/ inheritance	consanguinity	reference	description e)	sex	clinical course	Max NH3 f)	other data f)	de novo		no family history		inherited		NA	total	neonatal						NBS	late						childhood						adult
																	non CGA	CGA		likely	non CGA	CGA			All	De	Sy	Al	Cu	ND		All	De	Sy	Al	Cu	ND	All	De	Sy	Al	Cu	ND	All	De	Sy	Al	Cu	ND
NAGS-01 -01	263	c.787G>T	p.Glu263* _amber	homozygote	neonatal	IN	1	1	yes previous 3 siblings	yes	Bijarnia-Mahay 2018 [101A]	Dataset1 121, 3 syb. deaths	F	death						1					1	1
NAGS-02 -01	324	c.971G>A	p.Trp324* _amber	homozygote	neonatal (16h)	US-Faroe Is	1	1	no healthy parents	distant relatives (approximately five generations back)	Caldovic 2003 [102]	Family1 (page365)	M	death (4d)	ND	pH 7.56			1						1	1
NAGS-02- -02-01	324	c.971G>A	p.Trp324* _amber	homozygote	neonatal (2d)	US-Hispanic	1	1	healthy parents older sister of below	no Takanashi 2003	Caldovic 2003 [102]	Family2 3rd child (page365)	F	liver transplantation at 8m	1700 µM	Glu 362 (0-50) µM Gln 1268 (538-958) µM, Cit -				1					1				1
NAGS-02 -02-02	324	c.971G>A	p.Trp324* _amber	homozygote	neonatal (2d)	US-Hispanic		1	healthy parents younger sister of above	no Takanashi 2003	Caldovic 2003 [102]	Family2 sister (page365)	F	hemodialysis	978 µM	Gln 1710 (538-958) µM Cit -				0					1			1
NAGS-02- -03-01	324	c.971G>A	p.Trp324* _amber	homozygote	neonatal (2d)	DE-Turkish	1	1	older sister of below	yes first cousins	Gessler 2010 [103]	3rd child YD (p198)	F	no neurological abnormality (13y)	393 µM	Gln 1961 (254-823) µM Leu 33 (56-98) µM Ile 7 (31-48)µM				1					1			1
NAGS-02 -03-02	324	c.971G>A	p.Trp324* _amber	homozygote	neonatal (4d)	DE-Turkish		1	younger sister of above	yes first cousins	Gessler 2010 [103]	1st child TD (p198)	F	death (22d)	2000 µM	ND				0					1	1
NAGS-02 -04	324	c.971G>A	p.Trp324* _amber	homozygote	neonatal (≤3d) $	NO	1	1	unrelated, healthy parents	no	Reigstad 2017 [104]	Respiratory destress at Day 0	F	7m develop normally, $successful treatment	2455 µM	Gln 872 (400-850) µM Cit -			1						1			1
NAGS-03 -01-01	331	c.991C>T	p.Gln331* _amber	homozygote	neonatal_early	ES+CH	1	1	sibling of below	ND	Sancho-Vaello 2016 [105]	Table2 Family35		death (7d)	comatous					1					1	1
NAGS-03 -01-02	331	c.991C>T	p.Gln331* _amber	homozygote	neonatal	ES+CH		1	sibling of above	ND	Sancho-Vaello 2016 [105]	Table2 Family35		death (19d)	comatous					0					1	1
NAGS-03 -02	331	c.991C>T	p.Gln331* _amber	homozygote	neonatal	IN	1	1	not known	not known	Bijarnia-Mahay 2018 [101A]	Dataset1 120		death	ND								1		1	1
NAGS-04 -01	422	c.1264G>T	p.Glu422* _amber	homozygote	ND	ES+CH	1	1	ND	ND	Sancho-Vaello 2016 [105]	Table2 Family38 no clinical information			ND								1
NAGS-05 -01	498	c.1494G>A	p.Trp498* _opal	not found	neonatal	ES+CH	1	1	healthy father carried the mutation in heterozygosis with the normal allele	ND	Sancho-Vaello 2016 [105]	Table2 Family41		metabolically stable with NCG (N-carbamyl-L-glutamate)	368 µM						1				1			1
NAGS sum							9	12																9	11
																	0	0	2	4	1	0	2			6		4	1
CPS1-01 -01	44	c.130C>T	p.Gln44* _amber	ND	ND	JP	1	1	ND	ND	Ihara 1999 [201]	Hum Genet vol105 p375 (not in on-line)	ND		ND								1
CPS1-01 -02	44	c.130C>T	p.Gln44* _amber	p.Ile1324Hisfs*5 (c.3969insC)	neonatal (3d)	JP	1	1	ND	ND	Kurokawa 2007 [202]	Table1 5	M	death (1y)	1935 µM "3295 µg/dL"								1		1	1
CPS1-01 -03	44	c.130C>T	p.Gln44* _amber	p.Ala438Pro	neonatal (1d)	JP	1	1	ND	ND	Kurokawa 2007 [202]	Table1 6	M	death (20d)	1396 µM "2376 µg/dL"	Cit 8.2 µM							1		1	1
CPS1-02 -01	89	c.267C>G	p.Tyr89* _amber	ND	ND	CH	1	1	ND	ND	Häberle 2011 [203]	TableS2 140			ND								1
CPS1-03 -01	140	c.420C>A	p.Tyr140* _ochre	ND (Dx by parent’s sample)	neonatal	US	1	1		no	Eeds 2006 [204]	Table1 1			ND								1		1					1
CPS1-04 -01	188	c.562C>T	p.Gln188* _amber	p.Gly516Alafs*5 /mother	neonatal (4d)	KR	1	1	heterozygous carriers (Figure 1) Father/ 'p.Gln194*'	no	Choi 2017 [205]	see p.59	F	alive (6m)	1690 (11.2-48.2) µM	lactic acidosis, Cit low Gln 5777 (376-709) µM					1				1			1
CPS1-05 -01	238	c.712C>T	p.Arg238* _opal	homozygote	neonatal (1d)	DE- Iranian	1	1	ND	yes	Häberle 2003 [206]	Table1 6	ND	death (9d)	ND								1		1	1
CPS1-06 -01	335	c.1003C>T	p.Gln335* _amber	p.Lys280Asn	neonatal	JP	1	1	ND	ND	Kido 2021 [207B]	Table2 4	F	mental retardation	840 µM								1		1		1
CPS1-07 -01	375	c.1123C>T	p.Gln375* _amber	c.840+1G>C (splice donor)/ mother	neonatal (3d)	JP	1	1	heterozygotic parents (Figure 2) Father/ '1123C>T'	no	Aoshima 2001 [208]	see p.634	M	death (28d)	1970 µM						1				1	1
CPS1-08 -01	430	c.1289C>G	p.Ser430* _opal	p.Leu1325*_opal c.3972delT	neonatal (1d)	PL	1	1	yes affected brother	ND	Pronicka 2016 [209]	Table1.3.S1 40, affected brother		death (10d)	increased	urine 3-MGA 22-30 mmol/mol creat.				1					1	1
CPS1-08 -02-01,02	430	c.1289C>G	p.Ser430* _opal	p.Leu1325*_opal c.3972delT	neonatal (2d, 3d)	AT-Polish	1	2	healthy unrelated parents siblings affecetd	no	Rokicki 2017 [210]	Table1 2 Table1 3	M M	death (2d) death (14d)	ND 2142 µM	urine 3-MGA +++ (<20) Gln 1737 (538-958) µM urine 3-MGA 88 (<20)				1					2	2
CPS1-08 -02-03	430	c.1289C>G	p.Ser430* _opal	p.Leu1325*_opal c.3972delT	neonatal$	AT-Polish	0	1	healthy unrelated parents younger sister of above	no	Rokicki 2017 [210]	Table1 4	F	alive (4.5m) $ treated from birth	337 µM	Gln 1167 (538-958) µM urine 3-MGA <20 (<20)				0					1			1
CPS1-09 -01	478	c.1432C>T	p.Gln478* _ochre	p.Ile1452Thr	late	US	1	1		no	Eeds 2006 [204]	Table1 8			ND								1									1					1
CPS1-10 -01	539	c.1615G>T	p.Glu539* _amber	ND	ND	CH	1	1	ND	ND	Häberle 2011 [203]	TableS2 143			ND								1
CPS1-11 -01	548	c.1642C>T	p.Gln548* _amber	p.Ile1254Phe	neonatal (2d)	MY	1	1	heterozygote (Table2)	no	Ali 2016 [211]	Table1,2 4	M	severe retardation (6.5y)	435 (<60) µM	Gln 1185 (<700) µM Cit low							1		1		1
CPS1-12 -01	569	c.1706C>A	p.Ser569* _amber	p.Arg638* _opal	nenonatal	IL	1	1	ND	ND	Staretz-Chacham 2020 [212C]	Table2 40	M	death (13d)	2164 µM "3685 µg/dL"	Cit 4.6 (10-50) µM							1		1	1
CPS1-13 -01	590	c.1770T>G	p.Tyr590* _amber	ND	ND	CH	1	1	ND	ND	Häberle 2011 [203]	TableS2 144			ND								1
CPS1-14 -01	638	c.1912C>T	p.Arg638* _opal	p.Ser569* _amber	neonatal	IL	1	0	ND	ND	Staretz-Chacham 2020 [212C]	Table2 40	M	death (13d)	2164 µM "3685 µg/dL"	Cit 4.6 (10-50) µM							1		0	0
CPS1-15 -01	721	c.2161C>T	p.Arg721* _opal	p.Leu843Ser, p.Lys875Glu	neonatal (2d)	DE- Indian	1	1	ND	no	Häberle 2003 [206]	Table1 3		death (7d)	ND								1		1	1
CPS1-15 -02	721	c.2161C>T	p.Arg721* _opal	p.Ala1191Asp	neonatal	CN	1	1	ND	ND	Dai 2021 [213]	TableS2 P016			ND								1		1					1
CPS1-16 -01	787	c.2359C>T	p.Arg787* _opal	homozygote	neonatal$	DE	1	1	yes brother died	yes	Rapp 2001 [214]	Table1 2		death (9m) $ treated from birth, affected brother	190 µM	(described in Zimmer 1995)				1					1	1
CPS1-16 -02	787	c.2359C>T	p.Arg787* _opal	c.236+6T>C [IVS2 + 6T > C]	neonatal (3d)	JP	1	1	ND	ND	Kurokawa 2007 [202] Kido 2021 [207B]	Table1 7 TableS6 4	F	severe mental retardation	1877 µM "3197 µg/dL"	Cit 6.3 µM							1		1		1
CPS1-16 -03, 06	787	c.2359C>T	p.Arg787* _opal	p.Tyr1031* _ochre	neonatal (2d)	JP	2	2	ND	ND	Kurokawa 2007 [202] Kido 2021 [207B]	Table1 8 Table2 14/ S6 31	M F	death (14d) mental retardation	>587.2 µM >334 µM								2		2	1	1
CPS1-16 -04	787	c.2359C>T	p.Arg787* _opal	p.Val1187Phe	neonatal (2d)	JP	1	1	healthy parents	no	Sugiyama 2020 [215] Kido 2021 [207B]	abstract TableS6 32	F	liver transplantation, normal (15m)	944 (50-150) µM	lactic acidosis			1						1				1
CPS1-16 -05	787	c.2359C>T	p.Arg787* _opal	p.Gly509Valfs6	neonatal	JP	1	1	ND	ND	Kido 2021 [207B]	Table2 12/ S6 24	M	mental retardation	588 µM								1		1		1
CPS1-17 -01	832	c.2494G>T	p.Glu832* _ochre	homozygote	ND	CH	1	1	ND	ND	Makris 2021 [216D]	TableS2 CPS1 exon20											1
CPS1-18 -01	953	c.2858C>A	p.Ser953* _ochre	p.Glu455Lysfs7	neonatal	JP	1	1	ND	ND	Kido 2021 [207B]	Table2 7	F	Abnormal brain MRI & brain wave	566 µM								1		1		1
CPS1-19 -01	965	c.2893C>T	p.Gln965* _amber	ND	ND	CH	1	1	ND	ND	Häberle 2011 [203]	TableS2 147			ND								1
CPS1-20 -01	966	c.2896G>T	p.Glu966* _amber	c.622-3C>G (splice region)	neonatal (3d)	CN	1	1	healthy unrelated parents the first child died	no	Yan 2019 [217]	Table1 2	F	death (4d)	823 (18-72) µM	lactic acidosis urine 3-MGA 45.75 (-4) mM				1					1	1
CPS1-21 -01, 02	1031	c.3093C>A	p.Tyr1031* _ochre	p.Arg787* _opal	neonatal (2d)	JP	2	0	ND	ND	Kurokawa 2007 [202] Kido 2021 [207B]	Table1 8 Table2 14/ S6 31	M F	death (14d) mental retardation	>587.2 µM >334 µM								2		0	0	0
CPS1-22 -01	1033	c.3097C>A	p.Glu1033* _ochre	p.Gly401Arg p.Ile937Asn	adult (42y)	Fr	1	1	ND	ND	Toquet 2021 [218E]	Tables1&2 26	M	Triggered by surgery	800 µM								1																					1			1
CPS1-23 -01	1046	c.3136C>T	p.Gln1046* _amber	homozygote	neonatal (2d)	AT-Italian	1	1	healthy unrelated parents	no	Rokicki 2017 [210]	Table1 8	M	death (8d)	5697 µM	Gln 4800 (538-958) µM urine 3-MGA 109 (<20)			1						1	1
CPS1-24 -01	1106	c.3317G>A	p.Trp1106* _amber	ND	ND	CH	1	1	ND	ND	Häberle 2011 [203]	TableS2 149			ND								1
CPS1-25 -01	1127	c.3380T>A	p.Leu1127* _amber	ND	ND	CH	1	1	ND	ND	Isler 2019 [219]	TableS2 1st			ND								1
CPS1-26 -01	1174	c.3520C>T	p.Arg1174* _opal	ND	neonatal (died as neonate)	CH	1	1	ND	ND	Häberle 2011 [203]	TableS2 150		died as neonate	ND								1		1	1
CPS1-26 -02	1174	c.3520C>T	p.Arg1174* _opal	p.Arg1174* _opal	neonatal (3d)	CH	1	1	ND	ND	Kretz 2012 [220]	Table2 11		death (5d)	ND								1		1	1
CPS1-26 -03	1174	c.3520C>T	p.Arg1174* _opal	p.Pro99Leu	neonatal (4d)	CH	1	1	ND	ND	Kretz 2012 [220]	Table2 14		referred (1m)	ND								1		1					1
CPS1-26 -04	1174	c.3520C>T	p.Arg1174* _opal	p.Arg780His /Father	neonatal (2d)	CN	1	1	heterozygotic parents (Figure 2) III-C2 Mother/ c.3520>T	ND	Liu 2021 [221]	Tables1&2 III-1	M	palsy (1y)	900 µM	Cit low						1			1		1
CPS1-27 -01	1259	c.3775A>T	p.Arg1259* _opal	p.Met815Ile	neonatal	CH	1	1	ND	ND	Isler 2019 [219]	TableS2 2nd			ND								1		1					1
CPS1-28 -01	1262	c.3784C>T	p.Arg1262* _opal	p.Val1141Gly	late (13y) > cnildhood	JP	1	1	ND	no	Wakutani 2004 [222]	PT3 see Kurokawa 2007 Table1 21 Kido2021Table 2 17	F	hyperammonaemic encephalopathy (13y)	1552 (Kido2021)								1									0						1		1
CPS1-28 -02	1262	c.3784C>T	p.Arg1262* _opal	c.3481_3483 del AA	neonatal	US	1	1		no	Eeds 2006 [204]	Table1 16	ND		ND								1		1					1
CPS1-28 -03	1262	c.3784C>T	p.Arg1262* _opal	p.Thr1443Ala	neonatal	US	1	1		no	Eeds 2006 [204]	Table1 17	ND		ND								1		1					1
CPS1-28 -04	1262	c.3784C>T	p.Arg1262* _opal	p.Arg850Cys	neonatal (2d)	JP	1	1	ND	ND	Kurokawa 2007 [202]	Table1 11	F	death (60d)	2584 µM "4400 µg/dL"	Cit low							1		1	1
CPS1-28 -05	1262	c.3784C>T	p.Arg1262* _opal	p.Arg803Gly	perineonatal (1m)	JP	1	1	healthy unrelated parents	no	Ono 2009 [223]	page 779	M	alive (1y 3m)	500 (<40) µM	Gln 896 (478-656) µM			1						1			1
CPS1-28 -06-01~02	1262	c.3784C>T	p.Arg1262* _opal	p.Leu341Ser	neonatal (1d)	IT	1	2	brothers died at 8m (Pt4)	ND	Funghini 2012 [224]	Tables1&2 3 Tables1&2 4	M M	death (4y) death (8m)	204 µM 294 µM	(Pt4 no genetic examination)				1					2	2
CPS1-28 -07	1262	c.3784C>T	p.Arg1262* _opal	p.Leu1245His	neonatal (1d)	CN	1	1	inherited father + mother (see Table2 P8 Trio)	ND	Zhou 2020 [225]	Tables1&2 P8	M	death (5d)	1004 (9-30) µM	Gln 1104 (2-35) µM Cit 1.58 (5-40) µM						1			1	1
CPS1-29 -01	1315	c.3945G>A	p.Trp1315* _opal	p.Arg587His	late (11m12d)	CN	1	1	siblings and other family members all healthy	no	Fan 2019 [226]	Tables1&2 4	M	moderate developmental delay (4y8m)	133.9 (9-33) µM	Cit 4.094 (7-35) µM			1													1		1
CPS1-30 -01	1318	c.3953T>A	p.Leu1318* _amber	p.Gln810Arg	neonatal (<5d)	IT	1	1	ND	ND	Funghini 2012 [224]	Tables1&2 9	M	death (5d)	1615 µM "2750 µg/dL"								1		1	1
CPS1-30 -02	1318	c.3953T>A	p.Leu1318* _amber	p.Arg814Trp	neonatal (1d)	IT	1	1	ND	ND	Funghini 2012 [224]	Tables1&2 11	M	liver transplantatioin, normal neurological outcome (3y)	1996 µM "3400 µg/dL"	Gln 1600 (530-913) µM Cit <2 (16-40) µM							1		1				1
CPS1-31 -01	1410	c.4229G>A	p.Trp1410* _amber	Not found	Referred at age 22 >adult	CH	1	1	ND	ND	Kretz 2012 [220]	Table2 3 page377			ND								1									0												1			1
CPS1 sum							51	51																51	38							2						1						2
																	0	0	4	5	2	2	38			20	7	3	2	6			0	1	0	0	1		0	1	0	0	0		0	0	2	0	0
OTC-01 -01	9	c.26T>G	p.Leu9* _opal	-	neonatal (2d)	KR	1	1	ND	ND	Kim 2006 [301]	Table1 1	M		430 (10-35) µM	Cit 33.5 (10-45) µM urine OA 532 (0.3-6.0)							1		1					1
OTC-02 -01	23	c.67C>T	p.Arg23* _opal	-	neonatal, 'severe form with neonatal onset'	US	1	1	ND	ND	Grompe 1991 [302]	Table3 573	M		ND								1		1					1
OTC-02 -02	23	c.67C>T	p.Arg23* _opal	chrX:38352763	female	UK-F	1	1	ND	ND	Genet 2000 [303]	Table1 3rd	F		ND								1
OTC-02 -03	23	c.67C>T	p.Arg23* _opal	-	neonatal (2d)	NO	1	1			Lindemann 2008 [304]	English abstract	M	death (2d)	>700 µM								1		1	1
OTC-02 -04	23	c.67C>T	p.Arg23* _opal	-	prenatal treatment$ maternal uncle’s death <1w	US	1	1	yes maternal uncle died (2d), mother diagnosed carrier	ND	Wilnai 2018 [305]	page298 case2	M	liver transplantation at 5m; normal development (3y)	$ prenatal treatment 234 (<30) µM	$ prenatal treatment Gln 672 (376-709) µM urine OA 2.4 (<4.4)						1			1				1
OTC-02 -05	23	c.67C>T	p.Arg23* _opal	chrX:38352763	female (2.5y)	CN-F	1	1	no, but inherited (Table 3)	ND	Lu 2020 [306]	Tables1&3 38	F	(4.5y)	190 µM	Gln 13.5 (6-30) µM urine OA 202.00 (0-1.5)						1
OTC-02 -06	23	c.67C>T	p.Arg23* _opal	chrX:38352763	female (onset ND)	US-F-Caucasian	1	1	no	ND	Kumar 2021 [307]	Table1 4	F	(32y)	123 µM	Cit 2 (6<) µM							1
OTC-03 -01	32	c.94C>T	p.Gln32* _ochre	chrX:38367307	female (15m)	CH-F-Caucasian	1	1	de novo	no	Oppliger Leibundgut1997 [308]	Table1 ML	F	death by hyperammonemic coma (20m)	ND		1
OTC-04 -01	36	c.106C>T	p.Gln36* _amber	chrX:38367319	female	UK-F	1	1	ND	ND	Genet 2000 [303]	Table2 1st	F		ND								1
OTC-04 -02-01,02	36	c.106C>T	p.Gln36* _amber	chrX:38367319	female (episodic) neonatal	Fr-F Fr	1	2	ND	ND	Gobin-Limballe 2021 [309]	TableS2 2nd	F M F	female: 1 episodic	ND								1		1					1
OTC-05 -01	50	c.148G>T	p.Gly50* _opal	chrX:38367361	female (8m)	Fr-F	1	1	healthy parents second daughter	ND	Feldmann 1992 [310]	page471 case2	F	liver transplantation at 5y, doing well (8y)	persistent	urine OA increased				1
OTC-05 -02	50	c.148G>T	p.Gly50* _opal	chrX:38367361	female (neonatal)	Fr-F	1	1	ND	ND	Gobin-Limballe 2021 [309]	TableS2 3rd	F	female: 1 neonatal	ND								1
OTC-06 -01	52	c.154G>T	p.Glu52* _ochre	chrX:38367367	female	US-F	1	1	ND	ND	McCullough 2000 [311]	Table1 females 3rd	F		NA								1
OTC-07 -01	58	c.174G>A	pTrp58* _opal	-	neonatal	US	1	1	ND	ND	Yamaguchi 2006 [312]	TableS1 50	M		ND								1		1					1
OTC-07 -02	58	c.174G>A	pTrp58* _opal	chrX:38367387	female (2y)	CN-F	1	1	no, de novo	ND	Lu 2020 [306]	Tables1&3 40	F		ND	Gln 18.96 (6-30) µM urine OA 141.39 (0-1.5)	1
OTC-08 -01	69	c.205C>T	p.Gln69* _amber	chrX:38367418	female (some time 5m~5y)	ES-F	1	1	de novo mother not a carrier	ND	Climent 1999 [313]	page2 patient EC, ‘de novo’ mutation	F		ND		1
OTC-09 -01	71	c.211G>T	p.Gly71* _opal	chrX:38367424	female (9m)	ES-F	1	1	de novo mother not a carrier p220	ND	Arranz 2007 [314]	Table1 6	F		ND		1
OTC-10 -01	72	c.214G>T	p.Glu72* _amber	-	neonatal	CN	1	1	ND	ND	Zhang 2019 [315F]	TableS2 41	M	admitted to NICU	ND								1		1					1
OTC-11 -01	73	c.219T>G	p.Tyr73* _amber	-	neonatal	CZ	1	1	de novo	ND	Storkanova 2012 [316]	Table1 3 'de novo' mutation	M		477 (<90) µM	Gln+Glu 5959 (200-1200) µM urine OA 449 (<6.6)	1								1					1
OTC-12 -01	78	c.232C>T	p.Gln78* _ochre	-	neonatal	US	1	1	ND	ND	Yamaguchi 2006 [312]	TableS1 61	M		ND								1		1					1
OTC-13 -01	82	c.245T>A	p.Leu82* _ochre	-	neonatal	US	1	1	ND	ND	Caldovic 2015 [317]	TableS1 73	M		ND								1		1					1
OTC-14 -01	82	c.245T>G	p.Leu82* _opal	chrX:38369824	female	US-F	1	1	ND	ND	McCullough 2000 [311]	Table1 females 6th	F		NA								1
OTC-15 -01	92	c.274C>T	p.Arg92* _opal	-	neonatal, 'severe form with neonatal onset'	US	1	1	ND	ND	Grompe 1991 [302]	Table3 SM	M		ND								1		1					1
OTC-15 -02, 03	92	c.274C>T	p.Arg92* _opal	chrX:38369853	female (4y) female (infancy)	CH-F-Caucasian	2	2	de novo de novo	no no	Oppliger Leibundgut1997 [308]	Table1 CS Table1 PT	F F		ND			2
OTC-15 -04	92	c.274C>T	p.Arg92* _opal	-	neonatal	UK	1	1	'de novo' mutation p672	ND	Genet 2000 [303]	Table2 6th	M		ND	Three pArg92* in Genet 2000 counted as different family.		1							1					1
OTC-15 -05, 06	92	c.274C>T	p.Arg92* _opal	-	female	UK-F	2	2	two females are not related p672	ND	Genet 2000 [303]	Table2 6th	F		ND	Three pArg92* in Genet 2000 counted as different family.							2
OTC-15 -07	92	c.274C>T	p.Arg92* _opal	-	neonatal (6d)	KR	1	1	ND	ND	Kim 2006 [301]	Table1 5	M		879 (10-35) µM	Cit 11.0 (10-45) µM urine OA 3750 (0.3-6.0)							1		1					1
OTC-15 -08	92	c.274C>T	p.Arg92* _opal	-	neonatal	CZ	1	1	inherited	ND	Storkanova 2012 [316]	Table1 4	M		1200 (<90) µM	Gln+Glu 6316 (200-1200) µM urine OA 97 (<6.6)						1			1					1
OTC-15 -09	92	c.274C>T	p.Arg92* _opal	-	neonatal (3d)	IN	1	1	yes maternal cousin	no	Bijarnia-Mahay 2018 [318A]	Dataset1 90	M	neonatal death	yes					1					1	1
OTC-15 -10	92	c.274C>T	p.Arg92* _opal	-	neonatal	CN	1	1	ND	ND	Yang 2020 [319]	TablesS2&S5 28	M	death (2d)	ND								1		1	1
OTC-15 -11, 12	92	c.274C>T	p.Arg92* _opal	chrX:38369853	neonatal [1] & female [4]	Fr [2 families]	2	5	ND	ND	Gobin-Limballe 2021 [309]	TableS2 4th	4F 1M	females: 2 episodic, 2 non-symptomatic/mild									2		1					1
OTC-16 -01-01,02	109	c.327T>A	p.Cys109* _opal	chrX:38381370	neonatal [2] & female [2]	Fr	1	4	ND	ND	Gobin-Limballe 2021 [309]	TableS2 6th	2F 2M	females: 2 non-symptomatic/mild									1		2					2
OTC-17 -01	141	c.421C>T	p.Arg141* _opal	chrX:38401309	female (19m)	JP-F	1	1	no; de novo (see Fig2&3)	ND	Hata 1989 [320]	page123	F	hyperammonemic episodes several times/year (13y)	ND			1
OTC-17 -02	141	c.421C>T	p.Arg141* _opal	-	neonatal, 'severe form with neonatal onset'	US	1	1	ND	ND	Grompe 1991 [302]	Table3 ZH	M		ND								1		1					1
OTC-17 -03	141	c.421C>T	p.Arg141* _opal	-	neonatal (1d)	JP	1	1	inherited from healthy mother (see Fig 1)	ND	Matsuura1993 [321]	FIg1 proband in EN	M	death (10d)	1210 µM	urine OA 395 (<5) µg/mg creatinine						1			1	1
OTC-17 -04	141	c.421C>T	p.Arg141* _opal	-	neonatal (1d)	CH	1	1	no, up to the fifth generation, but mother positive for allopurinol	ND	Oppliger Leibundgut 1996 [322]	Table2 63(3rd)	M	died in coma (1m)	664 µM	urine OA high excretion						1			1	1
OTC-17 -05	141	c.421C>T	p.Arg141* _opal	chrX:38401309	female	UK-F	1	1	ND	ND	Genet 2000 [303]	Table2 8th	F		ND								1
OTC-17 -06	141	c.421C>T	p.Arg141* _opal	-	neonatal	IN	1	1	yes two neonatal deaths	yes	Bijarnia-Mahay 2018 [318A]	Dataset1 92	M	neonatal death	yes							1			1	1
OTC-17 -07	141	c.421C>T	p.Arg141* _opal	chrX:38401309	female (episodic)	Fr	1	1	ND	ND	Gobin-Limballe 2021 [309]	TableS2 8th	F	females: 1 episodic									1
OTC-18 -01	143	c.429T>A	p.Tyr143* _ochre	chrX:38401317	female (unrecognized)	EG-F	1	1	mother of two girls with two abortions	ND	Mukhtar 2013 [323]	donor	F	donor of liver transplantation	280 µM	urine OA 593 (4.4)						1
OTC-19 -01	144	c.430A>T	p.Lys144* _ochre	chrX:38401318	female	US-F	1	1	ND	ND	Tuchman 1995 [324]	Table1 13th	F		ND								1
OTC-20 -01	146	c.437C>A	p.Ser146* _ochre	-	neonatal	UK	1	1	ND	ND	Kingsmore 2022 [325]	TableS8 subject 93			ND								1		1					1
OTC-21 -01	146	c.437C>G	p.Ser146* _opal	-	neonatal	UK	1	1	ND	ND	Genet 2000 [303]	Table2 5th	M		ND								1		1					1
OTC-21 -02	146	c.437C>G	p.Ser146* _opal	-	ND	US	1	1	ND	ND	Shchelochkov 2009 [326]	Table1B 10			ND	(unlikely to overlap with Genet 2000)							1
OTC-22 -01	154	c.460G>T	p.Glu154* _ochre	-	neonatal	US	1	1	ND	ND	Grompe1989 [327]	Table1 SZ(3rd)	M		ND								1		1					1
OTC-23 -01-01,02	164	c.491C>A	p.Ser164* _ochre	-	neonatal female (4y)	CZ	1	2	inherited siblings affecetd	ND	Storkanova 2012 [316]	Table1 7 Table1 30 (sister)	M F		1500 (<90) µM 39 (<60) µM	urine OA 351 (<6.6) urine OA 7 (<3.5)					1				1					1
OTC-24 -01	164	c.491C>G	p.Ser164* _opal	-	neonatal (6d)	JP	1	1	ND	ND	Hoshide 1993 [328]	Table1 KM3	M		ND								1		1					1
OTC-25 -01	167	c.501C>A	p.Tyr167* _ochre	-	neonatal (2d)	ES	1	1	yes brother died (3d)	ND	García-Pérez1995 [329]	Fig.1 D.G., brother’s death at day3	M	death (4d)	ND					1					1	1
OTC-26 -01	167	c.501C>G	p.Tyr167* _amber	-	neonatal (2d)	JP	1	1	ND	ND	Shimadzu1998 [330]	Table1 IK2(5th)	M		ND								1		1					1
OTC-27 -01	180	c.538C>T	p.Gln180* _amber	-	neonatal	US	1	1	ND	ND	Caldovic 2015 [317]	TableS1 198	M		ND								1		1					1
OTC-28 -01	193	c.578G>A	p.Trp193* _amber	-	neonatal (7d)	JP	1	1	ND	ND	Shimadzu1998 [330]	Table1 P46(6th)	M		ND								1		1					1
OTC-29 -01	193	c.579G>A	p.Trp193* _opal	-	neonatal (20d)	CN	1	1	yes, inherited	ND	Lu 2020 [306]	Tables1&3 3	M	death (24d)	ND	ND					1				1	1
OTC-30 -01	210	c.628A>T	p.Lys210* _ochre	-	ND	CH	1	1	ND	ND	Makris 2021 [331D]	TableS2 OTC exon6			ND								1
OTC-31 -01	224	c.670G>T	p.Glu224* _amber	-	ND	US	1	1	ND	ND	Shchelochkov 2009 [326]	Table1A 5			ND								1
OTC-32 -01	234	c.700G>T	p.Glu234* _amber	-	neonatal	US	1	1	ND	ND	Yamaguchi 2006 [312]	TableS1 236	M		ND								1		1					1
OTC-33 -01	235	c.703C>T	p.Gln235* _amber	chrX:38408781	female (1.5y)	CN-F	1	1	yes, inherited	ND	Lu 2020 [306]	Tables1&3 52	F	alive (3.3y)	114 µM	Gln 16.37 (6-30) µM urine OA 312.35 (0-1.5)					1
OTC-34 -01	256	c.766G>T	p.Gly256* _opal	chrX:38408924	female (neonatal)	Fr-F	1	1	ND	ND	Gobin-Limballe 2021 [309]	TableS2 10th	F	female: 1 neonatal									1
OTC-35 -01	265	c.794G>A	p.Trp265* _amber	-	late ('4.3y'), death >childhood	CN	1	1	no, de novo	ND	Lu 2020 [306]	Tables1&3 20	M	death (4.3y)	350 µM	Cit 1.77 (7-35) µM ALT 1455 (9-52) U/L	1															0						1	1
OTC-36 -01	265	c.795G>A	p.Trp265* _opal	-	neonatal	US	1	1	ND	ND	Yamaguchi 2006 [312]	TableS1 266	M		ND								1		1					1
OTC-37 -01	270	c.808C>T	p.Gln270* _ochre	-	neonatal	US	1	1	ND	ND	McCullough 2000 [311]	Table1 neonatal 27th	M		NA								1		1					1
OTC-38 -01	275	c.823A>T	p.Lys275* _ochre	-	neonatal	JP	1	1	ND	ND	Kido 2021 [332B]	Table1 47	M	liver transplantation at 5m	278 µM								1		1				1
OTC-39 -01	279	c.835C>T	p.Gln279* _amber	-	neonatal	US	1	1	ND	ND	McCullough 2000 [311]	Table1 neonatal 28th	M		NA								1		1					1
OTC-39 -02	279	c.835C>T	p.Gln279* _amber	-	female (< 2y)	IN	1	1	no	no	Bijarnia-Mahay 2018 [318A]	Dataset1 100	F	developmental delay (2y)	yes								1
OTC-40 -01	285	c.853C>T	p.Gln285* _amber	chrX:38409011	female (2y)	CZ-F	1	1	inherited	ND	Storkanova 2012 [316]	Table1 35	F		489 µM	Gln elevated urine OA 1681 (<6.6)					1
OTC-41 -01	298	c.894G>A	p.Trp298* _opal	chrX:38411888	female (late)	JP-F	1	1	ND	ND	Kido 2021 [332B]	Table1 52 page 2034	F		511 µM								1
OTC-42 -01	306	c.916A>T	p.Arg306* _opal	-	ND	US	1	1	ND	ND	Shchelochkov 2009 [326]	Table1A 6			ND								1
OTC-43 -01	310	c.928G>T	p.Glu310* _ochre	-	neonatal (≤ 3days)	US	1	1	ND	ND	Reish1993 [333]	FIg2 Pt9	M	death (within 3 days)	ND								1		1	1
OTC-43 -02	310	c.928G>T	p.Glu310* _ochre	chrX:38411922	female (3y5m)	IT-F	1	1	ND	ND	Giorgi 2000 [334]	Table1 5	F		117 µM "200 µg/dL"	Cit 9 (16-42) µM urine OA 15.4 (0.5-3.3)							1
OTC-44 -01	320	c.958C>T	p.Arg320* _opal	chrX:38411952	female (3y10m)	US-F	1	1	ND	ND	Demmer 1996 [335]	patient KK	F		>240 µM	urine OA excess							1
OTC-44 -02	320	c.958C>T	p.Arg320* _opal	chrX:38411952	female (9m)	KR-F	1	1	yes, healthy parents elder brother and maternal three uncles died at 1w.	ND	Yoo1996 [336]	case 3	F	recurrent hyperammonemia	494 µM	Cit 6.8 µM urine OA 130						1
OTC-44 -03	320	c.958C>T	p.Arg320* _opal	-	neonatal (4d)	JP	1	1	ND	ND	Matsuda 1997 [337]	Table1 19th	M		ND								1		1					1
OTC-44 -04	320	c.958C>T	p.Arg320* _opal	chrX:38411952	female (2m)	JP	1	1	ND	ND	Matsuda 1997 [337]	Table1 Females 8th	F		ND								1
OTC-44 -05	320	c.958C>T	p.Arg320* _opal	-	neonatal	UK	1	1	ND	ND	Genet 2000 [303]	Table1 19th	M		ND								1		1					1
OTC-44 -06	320	c.958C>T	p.Arg320* _opal	-	neonatal	US	1	1	ND	ND	McCullough 2000 [311]	Table1 neonatal 32nd	M		NA								1		1					1
OTC-44 -07	320	c.958C>T	p.Arg320* _opal	chrX:38411952	female (6m)	KR	1	1	ND	ND	Kim 2006 [301]	Table1 24	F		494 (10-35) µM	Cit 6.8 (10-45) µM urine OA 140 (0.3-6.0)							1
OTC-44 -08	320	c.958C>T	p.Arg320* _opal	-	neonatal (3d)	KR	1	1	ND	ND	Kim 2006 [301]	Table1 25	M		782 (10-35) µM	Cit 5.3 (10-45) µM urine OA 3618 (0.3-6.0)							1		1					1
OTC-44 -09	320	c.958C>T	p.Arg320* _opal	chrX:38411952	female (13m)	US-F	1	1	no, healthy parents strong history of autoimmune disorders	ND	Rajabi 2017 [338]	page 18	F		213 µM	Gln 1248 (303-1459) µM Cit 15 (4-50) µM			1
OTC-44 -10	320	c.958C>T	p.Arg320* _opal	-	neonatal	IL	1	1	ND	ND	Staretz-Chacham 2020 [339C]	Table2 9	M		>1762 µM ">3000 µg/dL"	Cit 5.2 (10-50) µM							1		1					1
OTC-44 -11~14	320	c.958C>T	p.Arg*320 _opal	chrX:38411952	neonatal [4] & female [8]	Fr [4 families]	4	12	ND	ND	Gobin-Limballe 2021 [309]	TableS2 11th	8F 4M	females: 2 chronic, 6 non-symptomatic/mild									4		4					4
OTC-44 -15	320	c.958C>T	p.Arg320* _opal	-	neonatal	JP	1	1	maternally inherited	ND	Suzuki 2022 [340]	Table1 21	M		ND					1					1					1
OTC-45 -01	321	c.962C>A	p.Ser321* _ochre	-	neonatal	US	1	1	ND	ND	Tuchman 2002 [341]	Table1 213	M		ND								1		1					1
OTC-46 -01	328	c.982G>T	p.Glu328* _ochre	-	neonatal	US	1	1	ND	ND	Yamaguchi 2006 [312]	TableS1 314	M		ND								1		1					1
OTC-47 -01	331	c.991A>T	p.Lys331* _amber	chrX:38411985	female	US-F	1	1	ND	ND	Yamaguchi 2006 [312]	TableS1 317	F		ND								1
OTC-48 -01	332	c.995G>A	p.Trp332* _amber	-	neonatal	US	1	1	ND	ND	McCullough 2000 [311]	Table1 neonatal 35th	M		ND								1		1					1
OTC-48 -02	332	c.995G>A	p.Trp332* _amber	chrX:38411989	female (68y)	DE-F	1	1	ND	ND	Marquetand 2020 [342]	page 3	F	intake of nutritinal supplement, discharged in a healthy condition	697 (12-47) µM	Gln 1067 (340-740) µM, Cit normal urine OA 288 (0-1.5)							1
OTC-49 -01	332	c.996G>A	p.Trp332* _opal	-	neonatal (2d)	JP	1	1	ND	ND	Matsuura 1994 [343]	Table1 TK5	M		ND								1		1					1
OTC-49 -02	332	c.996G>A	p.Trp332* _opal	chrX:38411990	femal (29y)	Fr-F	1	1	daughter diagnosed at 9m	ND	Toquet 2021 [344E]	Table4 62	F	alive									1
OTC-50 -01	348	c.1042C>T	p.Gln348* _amber	chrX:38421059	perinatal (F)	CH-F-Caucasian	1	1	ND	no	Oppliger Leibundgut 1997 [308]	Table1 MJ	F	death by hyperammonemic coma (25y)	ND								1
OTC sum							94	110																94	53						0	0						1
																	6	4	1	4	4	8	67			9	0	0	2	42			0	0	0	0	0		1	0	0	0	0
ASS1-01 -01	27	c.79C>T	p.Gln27* _ochre	homozygote	neonatal	CH-Arabic	1	1	ND	ND	Diez-Fernandez 2017 [401]	Table2 2A			ND								1		1					1
ASS1-01 -02	27	c.79C>T	p.Gln27* _ochre	p.Glu283Lys	ND	CH-Argentina	1	1	ND	ND	Diez-Fernandez 2017 [401]	Table2 2B		alive (3m)	ND								1
ASS1-01 -03	27	c.79C>T	p.Gln27* _ochre	p.Gly324Ser	ND	CH-Argentina	1	1	ND	ND	Diez-Fernandez 2017 [401]	Table2 2C			ND								1
ASS1-02 -01	34	c.102T>G	p.Tyr34* _amber	p.Glu283Asp	ND	DE	1	1	ND	ND	Zielonka 2019 [402]	FigS3B c.102T>G, enzymatic ASS1ay			ND								1
ASS1-03 -01	97	c.291C>A	p.Cys97* _opal	homozygote	neonatal_NBS	CH-Switzerland	1	1	ND	ND	Diez-Fernandez 2017 [401]	Table2 5			>500 µM	Cit >4,000 µM							1		1					1
ASS1-04 -01	138	c.412C>T	p.Gln138* _amber	homozygote	neonatal	CH-Germany	1	1	ND	ND	Diez-Fernandez 2017 [401]	Table2 6			ND								1		1					1
ASS1-05 -01	163	c.489C>A	p.Tyr163* _ochre	p.Gly390Arg	neonatal	CH-France	1	1	ND	ND	Diez-Fernandez 2017 [401]	Table2 9			609 µM	Cit 1,730 µM							1		1					1
ASS1-05 -02	163	c.489C>A	p.Tyr163* _ochre	p.Gln342His	neonatal (NBS)	JP	1	1	ND	ND	Kido 2021 [403B]	Table3 8	F	no mental retardation	50 µM								1		1			1
ASS1-06 -01	190	c.570C>A	p.Tyr190* _ochre	p.Gly117Asp	neonatal (7d)	IN	1	1	yes one neonatal death	no	Bijarnia-Mahay 2018 [404A]	Dataset1 16	F	death	ND	Cit elevated				1					1	1
ASS1-07 -01	275	c.823G>T	p.Gly275* _opal	homozygote	prenatal_fetus	NL	1	1	ND	ND	Kleijer 2006 [405]	Table3 4th, p247: diagnosed by elevated plasma and urine metabolites levels			ND								1		1					1
ASS1-08 -01, 02	279	c.835C>T	p.Arg279* _opal	ND	ND	TW-USA	2	2	ND	ND	Li 2001 [406]	page 686, skin fibroblasts from Pt AC&CB were used.			ND								2
ASS1-08 -03	279	c.835C>T	p.Arg279* _opal	p.Arg265His	late (3y) > chikdhood	JP	1	1	heterozygote (Table 1 diagnosed parents not described, cannot assign de novo or inherited)	ND	Gao 2003 [407]	Table1 P378		onset or diagnosis was 3y	170 (10-60) µM	Cit 1672 (10-50) µM							1									0						1			1
ASS1-08 -04	279	c.835C>T	p.Arg279* _opal	p.Trp179Arg	NBS	US	1	1	ND	ND	Dimmock 2008 [408]	Table1 6, patient 6 p2888	M	protein-restricted, asymptomatic, normal development (10m)	no hyperammonemia	Cit 382 or 911 (-180) µM							1					1			1
ASS1-08 -05	279	c.835C>T	p.Arg279* _opal	c.1194-1G>C (splice acceptor)	neonatal	US	1	1	NA	ND	Miller 2014 [409]	Table1 39, at least one child diagnosed with the classical neonatal form			ND								1		1					1
ASS1-09 -01	282	c.846C>A	p.Tyr282* _ochre	p.Arg279Gln	counted as neonatal	US-Hispanic	1	1	ND	ND	Ruxmohan 2021 [410]	Page 109	F	After birth, … severe developmental delays (19y)	ND	Cit 3902 (15.6-46.9) µM							1		1		1
ASS1-10 -01	311	c.931C>T	p.Gln311* _ochre	ND	severe' ; counted as neonatal	DE- Italy	1	1	ND	ND	Engel 2009 [411]	Table1 8th			ND								1		1					1
ASS1-11 -01	344	c.1030C>T	p.Arg344* _opal	ND	ND	DE-Germany	1	1	ND	ND	Engel 2009 [411]	Table1 9th			ND								1
ASS1-12 -01	357	c.1069C>T	p.Gln357* _amber	p.Gly390Arg	neonatal	US	1	1	NA	ND	Miller 2014 [409]	Table1 28, at least one child diagnosed with the classical neonatal form			ND								1		1					1
ASS1-13 -01	380	c.1138C>T	p.Gln380* _amber	p.Arg363Gly	neonatal (4d)	GR	1	1	healthy unrelated parents	no	Augoustides-Savvopoulou 2000 [412]	JInherMetabDis 23 Suppl. 1. p57 (not in on-line) 1 syb. deaths	F	death (9d)	ND				1						1	1
ASS1 sum							20	20																20	12						1	0						1						0
																	0	0	1	1	0	0	18			2	1	2	0	8			0	0	0	0	0		0	0	1	0	0
ASL-01 -01	62	c.184C>T	p.Gln62* _amber	p.Arg193Gln	neonatal described as early onset	DE	1	1	ND	ND	Zielonka 2020 [501]	TableS1 18			ND								1		1					1
ASL-02 -01	98	c.292G>T	p.Glu98* _amber	p.Val117Glyfs*3	tested at 2y	CH-USA	1	1	ND	ND	Balmer 2014 [502]	TableS2 35			ND								1									1					1
ASL-03 -01	110	c.328G>T	p.Gly110* _opal	p.Arg12Gln	ND: Zielonka2020 no.29 is NBS	CH	1	1	ND	ND	Balmer 2014 [502]	TableS2 3			ND								1
ASL-04 -01~03	116	c.346C>T	p.Gln116* _amber	homozygote	ND	DE- Arabic	3	3	ND	ND	Linnebank 2002 [503]	Table2 859, 893, 894	F		ND								3
ASL-04 -04	116	c.346C>T	p.Gln116* _amber	homozygote	neonatal	DE- Arabic	1	1	ND	ND	Balmer 2014 [502]	TableS2 53		neonatal death	ND								1		1	1
ASL-05 -01	127	c.379C>T	p.Gln127* _amber	homozygote	neonatal	SA	1	1	unknown	unknown	Monies 2019 [504]	TableS1 UPN-1752	F		ND								1		1					1
ASL-06 -01	137	c.411G>A	p.Trp137* _opal	p.Tyr375Cys	NBS 1m	KR	1	1	ND	ND	Kim 2018 [505]	Tables2&3 3	M	no symptom except for space brittle hair is described. (3y)	104 µM	Cit 115 (10-45) µM ASA 25408 µM							1								1
ASL-07 -01, 02	182	c.544C>T	p.Arg182* _opal	p.Arg456Trp	neonatal (7d) neonatal	IT	2	2	ND	ND	Trevisson 2007 [506] Trevisson 2009 [507]	Tables1&2 10 Table1 13		alive (1y) clinical data not available	235 µM "400 µg/dL" ND	ASA >500 µM							2		2					2
ASL-07 -03	182	c.544C>T	p.Arg182* _opal	homozygote	ND Balmer 2014 no.121 is neonatal	SA	1	1	no aditional clinical details are available	ND	Imatiaz 2010 [508]	page3 One patient was homozygous…			ND								1
ASL-07 -04, 05	182	c.544C>T	p.Arg182* _opal	p.Arg217* _opal	neonatal	CH-USA	2	2	two independent patients	ND	Balmer 2014 [502]	TableS2 122; two independent patients			ND								2		2					2
ASL-07 -06	182	c.544C>T	p.Arg182* _opal	p.Val349Cysfs*72	NBS: Zielonka2020 no.12 is neonatal	CH-USA	1	1	ND	ND	Balmer 2014 [502]	TableS2 123			ND								1								1
ASL-07 -07	182	c.544C>T	p.Arg182* _opal	p.Arg456Trp	neonatal	CH-Belgian	1	1	ND	ND	Balmer 2014 [502]	TableS2 125			ND								1		1					1
ASL-07 -08	182	c.544C>T	p.Arg182* _opal	p.Glu258Lys	late (after 28d of birth)	UK	1	1	ND	ND	Baruteau 2017 [509]	Table2 8			ND								1									1					1
ASL-07 -09	182	c.544C>T	p.Arg182* _opal	p.Arg236Trp	neonatal	CN	1	1	ND	ND	Zhang 2019 [510F]	TableS2 43	F	admitted to NICU	ND								1		1					1
ASL-08 -01	213	c.637C>T	p.Arg213* _opal	p.Glu150_Ser175 del	neonatal (4d)	IT	1	1	ND	ND	Trevisson 2007 [506]	Tables1&2 3		mental retardation with epilepsy (9y)	1174 µM "2000 µg/dL"	ASA >700 µM							1		1		1
ASL-08 -02	213	c.637C>T	p.Arg213* _opal	homozygote	ND	CH-USA	1	1	ND	ND	Balmer 2014 [502]	TableS2 159		deceased	ND								1
ASL-08 -03	213	c.637C>T	p.Arg213* _opal	p.Glu241Lys	ND	CH-USA	1	1	ND	ND	Balmer 2014 [502]	TableS2 159		deceased	ND								1
ASL-08 -04	213	c.637C>T	p.Arg213* _opal	p.Val434Leu	neonatal	IN	1	1	no	no	Bijarnia-Mahay 2018 [511A]	Dataset1 65	M	developmental delay with liver disease	1600 µM								1		1		1
ASL-08- -05	213	c.637C>T	p.Arg213* _opal	p.Ser170Asn	neonatal	IN	1	1	no	no	Bijarnia-Mahay 2018 [511A]	Dataset1 66	F	neonatal death	1800 µM								1		1	1
ASL-08 -06	213	c.637C>T	p.Arg213* _opal	p.Val434Leu	late (2y)	IN	1	1	no	no	Bijarnia-Mahay 2018 [511A]	Dataset1 69	F	mild developmental delay with liver disease	115 µM								1									1		1
ASL-08 -07	213	c.637C>T	p.Arg213* _opal	p.Lys69Arg	late (16m); 4x tonic seizures over 10 days	CN-Han	1	1	normal parents	ND	Zhao 2019 [512]	page2	M	death after a serious infection (2y)	ND	Cit 220.94 (7-35) µM			1													1	1
ASL-08 -08	213	c.637C>T	p.Arg213* _opal	p.Gln116Arg	neonatal, mental retardation	JP	1	1	ND	ND	Kido 2021 [513B]	Table4 4	M	mental retardation, twisted hair	312 µM								1		1		1
ASL-09 -01	217	c.649C>T	p.Arg217* _opal	p.Arg12Gln	NBS	CH-USA	1	1	ND	ND	Balmer 2014 [502]	TableS2 8			ND								1								1
ASL-09 -02	217	c.649C>T	p.Arg217* _opal	p.Asp120Glu	tested at 1.5m	CH-USA	1	1	ND	ND	Balmer 2014 [502]	TableS2 54			ND								1									1					1
ASL-09 -03	217	c.649C>T	p.Arg217* _opal	p.Arg182* _opal	neonatal	CH-USA	1	0	ND	ND	Balmer 2014 [502]	TableS2 122			ND								1		0
ASL-09 -04	217	c.649C>T	p.Arg217* _opal	homozygote	neonatal (3d)	CH-USA	1	1	ND	ND	Balmer 2014 [502]	TableS2 163			ND								1		1					1
ASL-09 -05	217	c.649C>T	p.Arg217* _opal	p.Ala398Asp	neonatal	CH-Italian	1	1	ND	ND	Balmer 2014 [502]	TableS2 164			ND								1		1					1
ASL-09 -06	217	c.649C>T	p.Arg217* _opal	p.Ser447Asn	neonatal, tested at 20d	CH-USA	1	1	ND	ND	Balmer 2014 [502]	TableS2 165			ND								1		1					1
ASL-09 -07	217	c.649C>T	p.Arg217* _opal	homozygote	neonatal(4d)	IN	1	1	yes previous child	no	Bijarnia-Mahay 2018 [511A]	Dataset1 72	M	death	1866 µM					1					1	1
ASL-10 -01	245	c.735G>A	p.Trp245* _opal	p.Arg95His	NBS	CH-USA	1	1	ND	ND	Balmer 2014 [502]	TableS2 34			ND								1								1
ASL-11 -01	344	c.1030C>T	p.Gln344* _amber	p.Ala205Val	ND	CH-USA	1	1	ND	ND	Balmer 2014 [502]	TableS2 154			ND								1
ASL-12 -01-01	354	c.1060C>T	p.Gln354* _amber	homozygote	neonatal(3d)	SA	1	1	The mother and father are heterozygous (Figure 2)	first cousins	Al-Sayed 2005 [514]	page878 Patient 1	M	(5y)	352 µM	mild acidosis					1				1			1
ASL-12 -01-02	354	c.1060C>T	p.Gln354* _amber	homozygote	neonatal(3d)	SA	0	1	The mother and father are heterozygous (Figure 2)	first cousins	Al-Sayed 2005 [514]	page878 Patient 2, younger sister of patient 1	M	(5y)	ND						0				1			1
ASL-12 -02~15	354	c.1060C>T	p.Gln354* _amber	homozygote	NBS	SA	14	14	no further clinical details are available	ND	Al-Sayed 2005 [514]	page881 exclusively homoallelicin 14 out of 28…			ND								14							14	14
ASL-12 -16~30	354	c.1060C>T	p.Gln354* _amber	homozygote	ND	SA	15	15	no aditional clinical details are available	ND	Imatiaz 2010 [508]	page2 15 (54%) were homoallelic…			ND								15
ASL-13 -01	361	c.1081G>T	p.Gly361* _opal	homozygote	ND	SA	1	1	no aditional clinical details are available	ND	Imatiaz 2010 [508]	page3 Finally, one patient was homozygous…			ND								1
ASL-14 -01	428	c.1284G>A	p.Trp428* _opal	p.Arg456Trp	late (after 28d of birth)	UK	1	1	ND	ND	Baruteau 2017 [509]	Table2 19			ND								1									1					1
ASL-15 -01	430	c.1290C>A	p.Tyr430* _ochre	p.Arg113Trp	ND Zielonka2020 no.15 is late (after newborn period)	CH-Greek	1	1	ND	ND	Balmer 2014 [502]	TableS2 47			ND								1
ASL-16 -01	437	c.1331T>A	p.Tyr437* _ochre	p.Gly206Val	ND	CH-French	1	1	ND	ND	Balmer 2014 [502]	TableS2 155			ND								1
ASL-17 -01	437	c.1331T>G	p.Tyr437* _amber	homozygote	ND	CN	1	1	ND	ND	Lin 2017 [515]	English abstract			ND								1
ASL-18 -01	454	c.1360C>T	p.Gln454* _amber	ND	neonatal	US	1	1	ND	no p5288	Barbosa1991 [516]	Fig.3 LD: the arrow should have been directed to T, rather than A, to show CAG to TAG mutation			ND								1		1					1
ASL-19 -01	460	c.1378C>T	p.Gln460* _amber	p.His168Cys	NBS	CH-USA	1	1	ND	ND	Balmer 2014 [502]	TableS2 86			ND								1								1
ASL sum							72	72																72	20						19	6
																	0	0	1	1	1	0	69			3	3	2	0	26			1	1	0	0	4
ARG1-01 -01	12	c.34G>T	p.Gly12* _opal	p.Gly235Arg	1y6m > late	CN	1	1	parents were healthy	no	Wu 2013 [601]	Table1 4	F	seizures (4y)	107 µM	Arg 90.8 (5-25) µM			1													1		1
ARG1-01 -02	12	c.34G>T	p.Gly12* _opal	p.Glu42* _ochre	neonatal (30d)$	CN	1	1	normal family history	no	Zhang 2017 [602]	Table1 2, p71 no clinical symptoms	F	followe-up (12m) $ diagnosed in screening	121 µM	Arg 855.5 (1.44-61.1) µM			1						1			1
ARG1-02 -01	21	c.61C>T	p.Arg21* _opal	ND	22m > late	PT	1	1	four unrelated	no	Cardoso 1999 [603]	page2 1	F	neurological symptom (4y)	ND	Arg 410 µM							1									1		1
ARG1-02 -02	21	c.61C>T	p.Arg21* _opal	ND	1m > late	PT	1	1	four unrelated	no	Cardoso 1999 [603]	page2 2	F	liver chirrosis (4y)	ND	Arg 1750 µM							1									1		1
ARG1-02 -03	21	c.61C>T	p.Arg21* _opal	ND	23m > late	PT	1	1	four unrelated; 3 and 4 were born in adjacent locations; counted separately	no	Cardoso 1999 [603]	page2 3	M	mild developmental retardation (6y)	ND	Arg 556 µM				1												1		1
ARG1-02 -04	21	c.61C>T	p.Arg21* _opal	ND	11m > late	PT	1	1		no	Cardoso 1999 [603]	page2 4	F	developmental regression (8y)	ND	Arg 1475 µM				1												1		1
ARG1-02 -05	21	c.61C>T	p.Arg21* _opal	homozygote	6w > late	CA-Iraq	1	1	two healthy siblings	first cousins	Jain-Ghai 2011 [604]	page108 index case	M	neuropsychological delay (19m)	739 µM	Arg 841 (53-71) µM				1												1		1
ARG1-02 -06	21	c.61C>T	p.Arg21* _opal	p.Ala298Pro	ND	CA	1	1	ND	ND	Jain-Ghai 2011 [604]	Table1 5	F	severe delay (39y)	ND								1
ARG1-02 -07	21	c.61C>T	p.Arg21* _opal	p.Gly74Val	3y > childhood	BR	1	1		no	Carvalho 2012 [605]	Table1 8	M	severe mental retardation (21y)	ND	Arg 753 (74-129) µM							1															1		1
ARG1-02 -08	21	c.61C>T	p.Arg21* _opal	p.Trp122* _amber	24m > late	BR	1	1		no	Carvalho 2012 [605]	Table1 9	M	mild mental retardation (28y)	ND	Arg 567 (74-129) µM							1									1		1
ARG1-02 -09	21	c.61C>T	p.Arg21* _opal	p.Ile11Thr	4y > childhood	BR	1	1		no	Carvalho 2012 [605]	Table1 11	M	moderate mental retardation (17y)	ND	Arg 355 (74-129) µM							1															1		1
ARG1-02 -10	21	c.61C>T	p.Arg21* _opal	homozygote	3y > childhood	BR	1	1		no	Carvalho 2012 [605]	Table1 12	M	moderate mental retardation (7y)	ND	Arg 685 (74-129) µM							1															1		1
ARG1-02 -11	21	c.61C>T	p.Arg21* _opal	homozygote	17m >late	BR	1	1		second cousins	Carvalho 2012 [605]	Table1 13	F	severe mental retardation (13y)	ND	Arg 509 (74-129) µM							1									1		1
ARG1-02 -12~14	21	c.61C>T	p.Arg21* _opal	homozygote	neonatal_NBS	PT	3	3	ND	ND	Rodrigues 2014 [606]	J Inherit Metab Dis 37 Suppl1 S88 (not in on-line)			ND	Arg 105-1111 µM							3							3	3
ARG1-02 -15, 16	21	c.61C>T	p.Arg21* _opal	heterozygote	neonatal_NBS	PT	2	2	ND	ND	Rodrigues 2014 [606]	J Inherit Metab Dis 37 Suppl1 S88 (not in on-line)			ND	Arg 105-1111 µM							2							2	2
ARG1-02 -17, 18	21	c.61C>T	p.Arg21* _opal	homozygote	7y 13y	CH-Turkey	2	2			Diez-Fernandez 2018 [607]	Table2 2e 2f		no seizures but spastic paraplegia	739 (10-48) µM ND								2															2		2
ARG1-03 -01	42	c.124G>T	p.Glu42* _ochre	p.Gly12* _opal	neonatal (30d)$	CN	1	0	normal family history	no	Zhang 2017 [602]	Table1 2, p71 no clinical symptoms			121 µM	Arg 855.5 (1.44-61.1) µM			1						0
ARG1-04 -01	75	c.223A>T	p.Lys75* _ochre	p.Gly142Glu	neonatal_NBS	US-Hispanic	1	1	ND	ND	Edwards 2009 [608]		M	mild hepatomegaly etc. (6y)	Wnl but 121 µM at 4y	Arg 768 (12-133) µM at 2m							1					1			1
ARG1-05 -01	122	c.365G>A	p.Trp122* _amber	p.Gly235Arg /Father	<9m > late	JP	1	1	parents heterozygotic carriers, see Fig.4, Mother (lane4) G-TO-A-365	no	Uchino 1992 [609] Kido 2021b	Table1 1 case 2	M	mental retardation (7y) bedridden (37y)	217 µM "369 µg/dL"	Arg 644 µM					1											1		1
ARG1-05- -02	122	c.365G>A	p.Trp122* _amber	p.Arg21* _opal	24m > late	BR	1	0		no	Carvalho 2012 [605]	Table1 9	M	mild mental retardation (28y)	ND	Arg 567 (74-129) µM							1									0
ARG1-05- -03	122	c.365G>A	p.Trp122* _amber	p.Ile8Lys	3m > late	DE- Arabic	1	1	healthy parents	no	Amayreh 2014 [610]	page1021	M	seizure (9y6m)	ND				1													1		1
ARG1-05- -04	122	c.365G>A	p.Trp122* _amber	p.Asp274Asn /Father	30d > late	JP	1	1	parents heterozygotic carriers, see Fig.1, Mother c.365G>A	no	Yokoi 2021 [611] Kido 2021b	page 1 case 5	M	liver transplantation (1y 5m) normal (14y)	177 µM "301 µg/dL"	Arg 1402.2 (53.6-133.6) µM					1											1				1
ARG1-06- -01	291	c.871C>T	p.Arg291* _opal	p.Thr290Ser	neonatal$	UK-German-French	1	1	yes A third case in one family		Grody 1992 [612]	Table1 A.W.	F	$ followed from birth due to family history, Terheggen et al. (1975)	ND					1					1					1
ARG1-06- -02	291	c.871C>T	p.Arg291* _opal	c.647_648ins32	34d > late	AT	1	1	older sister and parents healthy	no	Scholl-Bürgi 2008 [613]	S324			>400 µM	Arg 971 µM			1													1					1
ARG1-06- -03	291	c.871C>T	p.Arg291* _opal	ND	3m > late	MY-Malay	1	1		can be first cousins	Mohseni 2014 [614]	Table1 2	M	lost ambulation (9y)	212 µM	Arg 400 (41-114) µM				1												1		1
ARG1-06- -04	291	c.871C>T	p.Arg291* _opal	homozygote	1y > late	CH-France	1	1			Diez-Fernandez 2018 [607]	Table2 6b		no seizures	ND	Arg 496 µM							1									1					1
ARG1 sum							30	28																30	2						6	14						5						0
																	0	0	5	5	2	0	18			0	0	2	0	6			0	11	0	1	2		0	5	0	0	0		0	0	0	0	0
SLC25A15-01 -01	8	c.22C>T	p.Gln8* _amber	p.Gly113Ser	neonatal (4d)	US	1	1	healthy parents Migraine headache during menstruation (Mother and maternal Grandmother)	no	Wild 2018 [701]	Table2 1	M	alive (70d)	1300 µM	Orn 1,538 µM				1					1			1
SLC25A15-02 -01	89	c.265C>T	p.Gln89* _amber	homozygote	1y > late	IT	1	1	ND	ND	Salvi 2001 [702]	Table H6	F	spastic paraparesis at 8y (44y)	ND								1									1		1
SLC25A15-03 -01	179	c.535C>T	p.Arg179* _opal	homozygote	mental retardation and spastic gait since infancy, cerebral palsy (11y)	JP	1	1	healthy parents	no	Tsujino 2000 [703]	patient 1(Fig2, 5)	M	first coma (32y), comatose episodes increased (41y)	98.1 µM	Orn 586.1 (47.1-72.5) µM			1													1		1
SLC25A15-03 -02	179	c.535C>T	p.Arg179* _opal	homozygote	adolescence: spastic gait, cerebellar signs (27y)	JP	1	1	ND	no information	Miyamoto 2001 [704]	patient 1	F	noted hyperammonemia at 36y (52y)	237 (<46) µM "404 µg/dL"	Orn 373 (36-110) µM							1															1		1
SLC25A15-03 -03	179	c.535C>T	p.Arg179* _opal	homozygote	developmental delay(infancy):3y spastic paraplegia > late	JP	1	1	healthy parents	first cousins	Miyamoto 2001 [704]	patient 2	M	lethargy and hyper-ammonemia (10y)	200 (<46) µM "340 µg/dL"	Orn "514 (50-80) µg/dL"				1												1		1
SLC25A15-03 -04	179	c.535C>T	p.Arg179* _opal	homozygote	12y > childhood	IT	1	1	ND	ND	Salvi 2001 [702]	Table H1	M	spastic paraparesis at 26y (28y)	ND								1															1		1
SLC25A15-03 -05-01	179	c.535C>T	p.Arg179* _opal	ND	neonatal	IT-Senegal	1	1	Family D	ND	Tessa 2009 [705]	Table1 5	F	lethargy and coma, mental retardation (6y)	700 µM	Orn 509 µM							1		1		1
SLC25A15-03 -05-02	179	c.535C>T	p.Arg179* _opal	ND	neonatal	IT-Senegal		1	Family D	ND	Tessa 2009 [705]	Table1 6	F	lethargy and coma, mild mental retardation (6y)	100 µM	Orn 290 µM							0		1		1
SLC25A15-03 -06-01	179	c.535C>T	p.Arg179* _opal	homozygote	'infancy' > late	IT-Morocco	1	1	Family M	ND	Tessa 2009 [705]	Table1 14, page 746 homozygous	M	lethargy and coma (2y)	96 µM	Orn 493 µM							1									1		1
SLC25A15-03 -06-02	179	c.535C>T	p.Arg179* _opal	homozygote	'infancy' > late	IT-Morocco		1	Family M	ND	Tessa 2009 [705]	Table1 15, page 746 homozygous	M	NA (6y)	ND								0									1					1
SLC25A15-03 -07, 08	179	c.535C>T	p.Arg179* _opal	homozygote	'3m to 7y' > late	CN	2	2	ND	ND	Guan 2017 [706]	English abstract patients 2 and 3		case 2 moderate mental retardation	276 µM	Orn 99.44 (15-100) µM							2									2		1	1
SLC25A15-04 -01	238	c.712C>T	p.Gln238* _ochre	p.Gly113Ser	1-8y seizures > late	SE-Caucasian	1	1	mother, daughter, sister heterozygotic carriers	ND	Silfverberg 2018 [707]		M	seizures (1-8y), loss of consciousness (48y)	213 µM	Orn 420 (30-110) µM				1												1		1
SLC25A15-05 -01	245	c.733A>T	p.Lys245* _ochre	ND	'infancy' > late	IT-Algeria	1	1	Family C	ND	Tessa 2009 [705]	Table1 3	M	mental retardation (5y)	370 µM	Orn 822 µM							1									1		1
SLC25A15-05 -02	245	c.733A>T	p.Lys245* _ochre	ND	infancy (prospective diagnosis at 2m) > late	IT-Algeria		1	Family C	ND	Tessa 2009 [705]	Table1 4	M	mental retardation (3y)	125 µM	Orn 887 µM							0									1		1
SLC25A15-06 -01-01	275	c.823C>T	p.Arg275* _opal	homozygote	5m deafness > late	JP	1	1	healthy parents originating from the same district	no	Torisu 2006 [708]	proband	F	deafness (5m), complex partial seizures (2y-), mild mental retardation (6y-) fatty liver (30 y)	140 µg/dL	Orn 373.8 (66.8-104.6) µM				1												1		1
SLC25A15-06 -01-02	275	c.823C>T	p.Arg275* _opal	ND, most likely homozygote	3y complex partial seizures > childhood	JP	0	1	healthy parents originating from the same district	no	Torisu 2006 [708]	brother of the proband	M	gait disturbance (12y-), death by acute encephalopathy (34y)	ND	ND				0																		1	1
SLC25A15 sum							13	17																13	3							11						3						0
																	0	0	1	4	0	0	8			0	2	1	0	0			0	9	1	0	1		1	2	0	0	0		0	0	0	0	0
SLC25A13-01 -01	16	c.46G>T	p.Glu16* _amber	ND	CTLN2	JP	1	1	ND	ND	Kobayashi 2003 [801]	Table1 footnote b			ND (p357 high blood ammonia …)								1
SLC25A13-01 -02	16	c.46G>T	p.Glu16* _amber	"p.Ser225* _amber/?"	NICCD	JP	1	1	Another allele, described as [IV]/[?], was not counted	ND	Tabata 2008 [802]	page541 P758			ND								1
SLC25A13-01 -03	16	c.46G>T	p.Glu16* _amber	p.Met285Profs*2 c.852_855delTATG	NICCD (0m)	JP	1	1	ND	ND	Kido 2022 [803]	DataS6 B-80	M	alive (16y)	NA								1
SLC25A13-02 -01	24	c.72T>A	p.Tyr24* _amber	p.Gln259* _amber/ Father	NICCD	CN-Chinese	1	1	inherited (Table 1) Mother	ND	Song 2013 [804]	Table1 C0060	M		ND						1
SLC25A13-03 -01	43	c.127C>T	p.Arg43* _opal	p.Arg355* _opal	NICCD (6w)	US-French-Canadian	1	1	Parents from the same region with case 2	no	Dimmock 2009 [805]	Table1 1	F	(2y)	ND	Cit 235 (<41) µM				1
SLC25A13-03 -02-01	43	c.127C>T	p.Arg43* _opal	p.Arg355* _opal	NICCD (6w)	US-French-Canadian	1	1	Yes son of case 3	no	Dimmock 2009 [805]	Table1 2	M	(2y)	ND	Cit 492 (<41) µM						1
SLC25A13-03 -02-02	43	c.127C>T	p.Arg43* _opal	p.Arg355* _opal	unrecognized (mother of case 2 24y)	US-French-Canadian	0	1	Yes mother of case 2	ND	Dimmock 2009 [805]	Table1 3, mother of 2	F	(24y)	wnl							0
SLC25A13-03 -03	43	c.127C>T	p.Arg43* _opal	homozygote	NICCD (6w)	US-French-Canadian	1	1	ND	ND	Dimmock 2009 [805]	Table1 4	F	(6m)	ND	Cit 948 (<41) µM							1
SLC25A13-04 -01	97	c.289C>T	p.Gln97* _amber	p.Ala206fs212* c.615+5G>A/ Father	LiverDisease_Choestasis	CN	1	1	inherited (see Dataset)	no	Fang 2021 [806]	Dataset 16/ Mother	F	(2.5y)	ND						1
SLC25A13-05 -01	150	c.448G>T	p.Glu150* _ochre	c.1177+1G>A [IVS11+1G>A]	CTLN2, adult-onset	CN-Japanese	1	1	ND	ND	Song 2013 [804]	Table1 P111	M		ND								1
SLC25A13-06 -01	159	c.475C>T	p.Gln159* _ochre	p.Arg467* _opal	NICCD	CN	1	1	ND	ND	Lin 2016 [807]	Table4 51			ND								1
SLC25A13-06 -02	159	c.475C>T	p.Gln159* _ochre	p.Arg467* _opal	NICCD	CN	1	1	ND	ND	Lin 2020 [808]	Table1 22	F	(2.3y)	ND								1
SLC25A13-07 -01	165	c.493C>T	p.Gln165* _ochre	c.aberrant RNA [IVS16ins3kb]	NICCD	CN	1	1	ND	ND	Lin 2016 [807]	Table1 152/C0401	F		ND								1
SLC25A13-08 -01	184	c.550C>T	p.Arg184* _opal	ND	NICCD	JP	1	1	ND	ND	Kobayashi 2003 [801]	Table1 footnote b			ND								1
SLC25A13-08 -02	184	c.550C>T	p.Arg184* _opal	c.aberrant RNA [IVS16ins3kb]	NICCD	CN	1	1	ND	ND	Lin 2016 [807]	Table1 03/C0173	F		ND								1
SLC25A13-08 -03	184	c.550C>T	p.Arg184* _opal	p.Ala554Glyfs*17 c.1638_1660dup	NICCD	CN	1	1	ND	ND	Lin 2016 [807]	Table1 80/C0291	F		ND								1
SLC25A13-08 -04	184	c.550C>T	p.Arg184* _opal	p.Met285Profs*2 c.852_855delTATG	NICCD	CN	1	1	ND	ND	Lin 2016 [807]	Table1 130/C0369	M		ND								1
SLC25A13-09 -01	214	c.640C>T	p.Gln214* _ochre	p.Leu570Thrfs*3 c.1706dupT/ Mother	NICCD (3m17d)	CN-CNinese	1	1	no, but inherited (Figure 1)/ Father	no	Wang 2015 [809]	abstract and p472 Table 1	F	condition improved by treatment (27-day-treatment)	118 (18-72) µM	Cit 346.1 (14-44) µM					1
SLC25A13-10 -01,02	225	c.674C>A	p.Ser225* _amber	p.Met285Profs*2 c.852_855delTATG	CTLN2 adult	JP	2	2	ND	yes first cousins	Kobayashi 1999 [810]	Fig.2 AP-18 AP-48	M M	(33y) (27y)	ND	Cit 582 (36±7) µM Cit 497 (36±7) µM					2
SLC25A13-10 -03	225	c.674C>A	p.Ser225* _amber	p.Met285Profs*2 c.852_855delTATG	CTLN2 (anorexia in infancy)	JP	1	1		ND	Tanaka 2002 [811]	Table3 case2	M	mental retardation (9y), symptom(18y), death (34y)	ND								1
SLC25A13-10 -04	225	c.674C>A	p.Ser225* _amber	c.16-1G>A [Ex1-1 G>A]	CTLN2 (24y)	JP	1	1		ND	Takahashi 2006 [812]	abstract and page CS14	M	unusual behavior and coma, treated (34y)	'2210 µg/dL'	Cit 384.3 (17-43) µM							1
SLC25A13-10 -05	225	c.674C>A	p.Ser225* _amber	p.Gln549* _amber/ Mother	CTLN2, adult	CN-Japanese	1	1	inherited (Table 1)/ Father	ND	Song 2013 [804]	Table1 P1508	M		ND						1
SLC25A13-10 -06	225	c.674C>A	p.Ser225* _amber	p.Met285Profs*2 c.852_855delTATG	NICCD	JP	1	1	Parental (Table III)	ND	Togawa 2016 [813]	Table III NCU15	M		ND						1
SLC25A13-10 -07,08	225	c.674C>A	p.Ser225* _amber	p.Met285Profs*2 c.852_855delTATG	NICCD	JP	2	2	ND	ND	Hirayama 2018 [814]	see page 2490		two of 20 children (5 to 13y)	ND								2
SLC25A13-10 -09,10	225	c.674C>A	p.Ser225* _amber	c.1177+1G>A [IVS11+1G>A]	NICCD	JP	2	2	ND	ND	Hirayama 2018 [814]	see page 2490		two of 20 children (5 to 13y)	ND								2
SLC25A13-10 -11,12	225	c.674C>A	p.Ser225* _amber	c.aberrant RNA [IVS16ins3kb]	NICCD	JP	2	2	ND	ND	Hirayama 2018 [814]	see page 2490		two of 20 children (5 to 13y)	ND								2
SLC25A13-10 13	225	c.674C>A	p.Ser225* _amber	c.1018+1 G>A	CTLN2 (74y)	JP	1	1	ND	ND	Suzuki 2019 [815]	see page 1893	F	a rare case without hepatocyte steatosis (74y)	'151 µg/dL'								1
SLC25A13-10 -14	225	c.674C>A	p.Ser225* _amber	p.Met285Profs*2 c.852_855delTATG	NICCD (1m)	JP	1	1	ND	ND	Kido 2022 [803]	DataS6 B-197	M	(8y)	NA (refer Table2 & DataS9)								1
SLC25A13-10 -15	225	c.674C>A	p.Ser225* _amber	p.Met285Profs*2 c.852_855delTATG	NICCD (2m)	JP	1	1	ND	ND	Kido 2022 [803]	DataS6 B-192	F	(4y)	NA (refer Table2 & DataS9)								1
SLC25A13-10 -16	225	c.674C>A	p.Ser225* _amber	p.Met285Profs*2 c.852_855delTATG	NICCD (7m)	JP	1	1	ND	ND	Kido 2022 [803]	DataS6 B-115	M	(7y)	NA (refer Table2 & DataS9)								1
SLC25A13-10 -17	225	c.674C>A	p.Ser225* _amber	p.Met285Profs*2 c.852_855delTATG	NICCD (3m)	JP	1	1	ND	ND	Kido 2022 [803]	DataS6 B-25	F	(10y)	NA (refer Table2 & DataS9)								1
SLC25A13-10 -18	225	c.674C>A	p.Ser225* _amber	c.1177+1G>A [IVS11+1G>A]	NICCD (0m)	JP	1	1	ND	ND	Kido 2022 [803]	DataS6 B-167	M	(6y)	NA (refer Table2 & DataS9)								1
SLC25A13-10 -19	225	c.674C>A	p.Ser225* _amber	c.1177+1G>A [IVS11+1G>A]	NICCD (2m)	JP	1	1	ND	ND	Kido 2022 [803]	DataS6 B-161	M	(16y)	NA (refer Table2 & DataS9)								1
SLC25A13-10 -20	225	c.674C>A	p.Ser225* _amber	c.1177+1G>A [IVS11+1G>A]	NICCD (1m)	JP	1	1	ND	ND	Kido 2022 [803]	DataS6 B-71	F	(14y)	NA (refer Table2 & DataS9)								1
SLC25A13-10 -21	225	c.674C>A	p.Ser225* _amber	c.1177+1G>A [IVS11+1G>A]	NICCD (2m)	JP	1	1	ND	ND	Kido 2022 [803]	DataS6 B-63	M	(13y)	NA (refer Table2 & DataS9)								1
SLC25A13-10 -22	225	c.674C>A	p.Ser225* _amber	c.1177+1G>A [IVS11+1G>A]	NICCD (1m)	JP	1	1	ND	ND	Kido 2022 [803]	DataS6 B-99	F	(12y)	NA (refer Table2 & DataS9)								1
SLC25A13-10 -23	225	c.674C>A	p.Ser225* _amber	c.1177+1G>A [IVS11+1G>A]	NICCD (1m)	JP	1	1	ND	ND	Kido 2022 [803]	DataS6 B-109	F	(12y)	NA (refer Table2 & DataS9)								1
SLC25A13-10 -24-01, 02	225	c.674C>A	p.Ser225* _amber	c.1177+1G>A [IVS11+1G>A]	NICCD (1m)	JP	1	2	same family	ND	Kido 2022 [803]	DataS6 B-50 B-51	F F	(5y) (5y)	NA (refer Table2 & DataS9)								1
SLC25A13-10 -25	225	c.674C>A	p.Ser225* _amber	p.Ala554Glyfs*17 c.1638_1660dup	NICCD (1m)	JP	1	1	ND	ND	Kido 2022 [803]	DataS6 B-124	M	(3y)	NA (refer Table2 & DataS9)								1
SLC25A13-10 -26	225	c.674C>A	p.Ser225* _amber	p.Tyr600*_ochre c.1799dupA	NICCD (1m)	JP	1	1	ND	ND	Kido 2022 [803]	DataS6 B-143	M		NA (refer Table2 & DataS9)								1
SLC25A13-10 -27-01, 02	225	c.674C>A	p.Ser225* _amber	p.Tyr600*_ochre c.1799dupA	NICCD (4m 1m)	JP	1	2	same family	ND	Kido 2022 [803]	DataS6 B-200 201	F M	(21y 20y)	NA (refer Table2 & DataS9)								1
SLC25A13-10 -28	225	c.674C>A	p.Ser225* _amber	c.aberrant RNA [IVS16ins3kb]	NICCD (4m)	JP	1	1	ND	ND	Kido 2022 [803]	DataS6 B-143	M	(14y)	NA (refer Table2 & DataS9)								1
SLC25A13-10 -29-01~03	225	c.674C>A	p.Ser225* _amber	ND	NICCD (10m 0m 0m)	JP	1	3	same family	ND	Kido 2022 [803]	DataS6 B-101-103	M F F	(10m 0m 0m)	NA (refer Table2 & DataS9)								1
SLC25A13-10 -30	225	c.674C>A	p.Ser225* _amber	p.Asp493Gly	CTLN2 (62y)	JP	1	1	ND	ND	Kido 2022 [803]	DataS6 A-10	M	(71y)	NA (refer Table2 & DataS9)								1
SLC25A13-11 -01	259	c.775C>T	p.Gln259* _amber	p.Tyr24* _amber/ Mother	NICCD	CH-Chinese	1	0	inherited (Table 1)/ Father	ND	Song 2013 [804]	Table1,4 C0060			ND						1
SLC25A13-11 -02	259	c.775C>T	p.Gln259* _amber	p.Met285Profs*2 c.852_855delTATG	NICCD	CH	1	1	ND	ND	Lin 2016 [807]	Table1 24/C0208	M		ND								1
SLC25A13-12 -01	283	c.847G>T	p.Gly283* _opal	p.Met285Profs*2 c.852_855delTATG	NICCD	CH-Chinese	1	1	ND	ND	Song 2011 [816]	Table 1 C0018	F	normal	ND								1
SLC25A13-12 -02	283	c.847G>T	p.Gly283* _opal	p.Met285Profs*2 c.852_855delTATG	NICCD (1m)	JP	1	1	ND	ND	Kido 2022 [803]	DataS6 B-41	F	(11y)	NA (refer Table2 & DataS9)								1
SLC25A13-13 -01	297	c.889G>T	p.Glu297* _ochre	p.Met285Profs*2 c.852_855delTATG	NICCD		1	1	ND	ND	Lin 2020 [808]	Table1 9			ND								1
SLC25A13-14 -01	319	c.955C>T	p.Arg319* _opal	ND	NICCD	JP-Chinese, Hebei	1	1	ND	ND	Song 2008 [817]	English abstract P1443			ND								1
SLC25A13-14 -02	319	c.955C>T	p.Arg319* _opal	p.Met285Profs*2 c.852_855delTATG	NICCD	CN	1	1	ND	ND	Lin 2016 [807]	Table1 103/C0336	M		ND								1
SLC25A13-14 -03	319	c.955C>T	p.Arg319* _opal	c.1177+1G>A [IVS11+1G>A]	NICCD (0m)	JP	1	1	ND	ND	Kido 2022 [803]	DataS6 B-177	M	(14y)	NA (refer Table2 & DataS9)								1
SLC25A13-15 -01~03	355	c.1063C>T	p.Arg355* _opal	p.Arg43* _opal	NICCD (6w~)	US-French-Canadian	2	0	See SLC25A13-03	Yes or ND	Dimmock 2009 [805]	Table1 1 1~4; SLC25A13-03-01~04			ND					1		1
SLC25A13-16 -01	360	c.1078C>T	p.Arg360* _opal	c.1177+1G>A [IVS11+1G>A] / Mother	NICCD	JP	1	1	inherited, paternal allele (p541)/ Father	ND	Tabata 2008 [802]	page541 P730			ND							1
SLC25A13-16 -02	360	c.1078C>T	p.Arg360* _opal	p.Ala25Glu	NICCD	BG	1	1		ND	Avdjieva-Tzavella2014 [818]	Abstract			ND								1
SLC25A13-16 -03~05	360	c.1078C>T	p.Arg360* _opal	p.Met285Profs*2 c.852_855delTATG	NICCD	CN	3	3	ND; 1 inherited (see Dataset/ Father)	ND; no	Lin 2016 [807] Fang 2021 [806]	Table1 36/C0226 42/C0237; Dataset 9	M	(Fang 2021 1.8y)	ND							1	2
SLC25A13-16 -06	360	c.1078C>T	p.Arg360* _opal	p.Met285Profs*2 c.852_855delTATG	NICCD	JP	1	1	ND	ND	Togawa 2016 [813]	Table III NCU16	M		ND								1
SLC25A13-16 -07	360	c.1078C>T	p.Arg360* _opal	p.Glu252Lys /Father	NICCD	CN	1	1	inherited (see Dataset)	no	Fang 2021 [806]	Dataset 17/ Mother	F	(2.5y)	ND							1
SLC25A13-16 -08, 09	360	c.1078C>T	p.Arg360* _opal	p.Met285Profs*2 c.852_855delTATG	NICCD (5m 0m)	JP	2	2	ND	ND	Kido 2022 [803]	DataS6 B-108 B-113	M F	(7y) (17y)	NA (refer Table2 & DataS9)								2
SLC25A13-17 -01	397	c.1189C>T	p.Gln397* _amber	p.Met285Profs*2 c.852_855delTATG	NICCD (1m)	JP-Taiwanese	1	1	inherited/ Father	ND	Sheng 2006 [819]	abstract of P-18-24 on p.163 in Suppl. 1	M		ND	Cit 323 µM					1
SLC25A13-18 -01	461	c.1381G>T	p.Glu461* _ochre	p.Ala554Glyfs*17 c.1638_1660dup	NICCD	CN	1	1	ND	ND	Lin 2016 [807]	Table1 54/C0249	F		ND								1
SLC25A13-19 -01	467	c.1399C>T	p.Arg467* _opal	IVS6+5G>A (splicing)	NICCD	CN	1	1	ND	ND	Lin 2016 [807]	Table1 119/C0356	F		ND								1
SLC25A13-19 -02~04	467	c.1399C>T	p.Arg467* _opal	p.Met285Profs*2 c.852_855delTATG	NICCD	CN	3	3	ND	ND	Lin 2016 [807]	Table1 63/C0264 66/C0268 131/C0371	F M F		ND								3
SLC25A13-19 -05	467	c.1399C>T	p.Arg467* _opal	p.Gln159* _ochre	NICCD	CN	1	0	ND	ND	Lin 2016 [807]	Table4 51; SLC25A13-06-01			ND								1
SLC25A13-19 -06	467	c.1399C>T	p.Arg467* _opal	p.Gln159* _ochre	NICCD	CN	1	0	ND	ND	Lin 2020 [808]	Table1 22; SLC25A13-06-02	F	(2.3y)	ND								1
SLC25A13-20 -01	549	c.1645C>T	p.Gln549* _amber	p.Ser225* _amber/ Father	CTLN2, adult	CN-Japanese	1	0	inherited (Table 1)/ Mother	ND	Song 2013 [804]	Table1 P1508; SLC25A13-10-03/ Mother	M		ND						1
SLC25A13-21 -01	579	c.1736G>A	p.Trp579* _amber	c.aberrant RNA [IVS16ins3kb]	NICCD	CN-Japanese	1	1	ND	ND	Song 2013 [804]	Table1 P530	M		ND								1
SLC25A13-22 -01	579	c.1737G>A	p.Trp579* _opal	c.aberrant RNA [IVS16ins3kb]	NICCD	CN	1	1	inherited (English abstract, main text Chinese)	NA (main text Chinese)	Zhou 2020 [820]	English abstract, also suffered from SMA			ND						1
SLC25A13-23 -01	588	c.1762C>T	p.Arg588* _opal	p.Arg355Gly c.1063C>G	NICCD	CN	1	1	ND	ND	Lin 2020 [808]	Table1 25			ND								1
SLC25A13-24 -01	601	c.1801G>T	p.Glu601* _ochre	c.1177+1G>A [IVS11+1G>A]	NICCD (2m)	JP	1	1	unrelated and healthy parents and a healthy older brother	no	Hayasaka 2012 [821]	patient 4	M	(5m)	ND	Cit 346 µM			1
SLC25A13-24 -02	601	c.1801G>T	p.Glu601* _ochre	c.1177+1G>A [IVS11+1G>A]	NICCD	JP	1	1	ND	ND	Hirayama 2018 [814]	see page 2490		one of 20 children (5 to 13y)	ND								1
SLC25A13-24 -03	601	c.1801G>T	p.Glu601* _ochre	c.1177+1G>A [IVS11+1G>A]	CTLN2 (48y)	JP	1	1	ND	ND	Hayasaka 2018 [822]	case 2	F	unconsciousness (44y), responded to Macton oil	'135 μg/dL'	Cit 509 mM							1
SLC25A13-24 -04	601	c.1801G>T	p.Glu601* _ochre	p.Met285Profs*2 c.852_855delTATG	NICCD (1m)	JP	1	1	ND	ND	Kido 2022 [803]	DataS6 B-163	M	(9y)	NA (refer Table2 & DataS9)								1
SLC25A13-24 -05, 06	601	c.1801G>T	p.Glu601* _ochre	c.1177+1G>A [IVS11+1G>A]	NICCD (2m 1m)	JP	2	2	ND	ND	Kido 2022 [803]	DataS6 B-152 B-185	M F	(10y) (15y)	NA (refer Table2 & DataS9)								2
SLC25A13-24 -07	601	c.1801G>T	p.Glu601* _ochre	c.1311+1G>A [IVS13+1G>A]	NICCD (1m)	JP	1	1	ND	ND	Kido 2022 [803]	DataS6 B-141	F	(13y)	NA (refer Table2 & DataS9)								1
SLC25A13-24 -08	601	c.1801G>T	p.Glu601* _ochre	p.Met285Profs*2 c.852_855delTATG	FTTDCD (2y)	JP	1	1	ND	ND	Kido 2022 [803]	DataS6 B-105	F	(9y)	NA (refer Table2 & DataS9)								1
SLC25A13-24 -09	601	c.1801G>T	p.Glu601* _ochre	c.1311+1G>A [IVS13+1G>A]	CTLN2 (48y)	JP	1	1	ND	ND	Kido 2022 [803]	DataS6 A-9	F	(55y)	NA (refer Table2 & DataS9)								1
SLC25A13-25 -01	605	c.1813C>T	p.Arg605* _opal	c.1177+1G>A [IVS11+1G>A]	CTLN2 (adult)	JP	1	1	ND	ND	Yasuda 2000 [823]	Table1 [II]/[VII]	F		ND								1
SLC25A13-25 -02	605	c.1813C>T	p.Arg605* _opal	p.Ala340_Arg392del c.1019_1177del	hypoketotic hypoglycemia(1y)	JP	1	1	ND	ND	Wada 2020 [824]		M										1
SLC25A13-25 -03	605	c.1813C>T	p.Arg605* _opal	p.Met285Profs*2 c.852_855delTATG /Mother	NICCD	CN	1	1	inherited (see Dataset/ Father)	no	Fang 2021 [806]	Dataset 15	M	(2.5y)	ND							1
SLC25A13-25 -04	605	c.1813C>T	p.Arg605* _opal	c.1177+1G>A [IVS11+1G>A]	NICCD (1m)	JP	1	1	ND	ND	Kido 2022 [803]	DataS6 B-142	M	(3y)	NA (refer Table2 & DataS9)								1
SLC25A13-25 -05	605	c.1813C>T	p.Arg605* _opal	c.1177+1G>A [IVS11+1G>A]	FTTDCD (1m)	JP	1	1	ND	ND	Kido 2022 [803]	DataS6 B-171	M	(2y)	NA (refer Table2 & DataS9)								1
SLC25A13-25 -06	605	c.1813C>T	p.Arg605* _opal	p.Met285Profs*2 c.852_855delTATG	CTLN2 (50y)	JP	1	1	ND	ND	Kido 2022 [803]	DataS6 A-12	M		NA (refer Table2 & DataS9)								1
SLC25A13-26 -01	606	c.1817G>A	p.Trp606* _amber	ND, but heterozygous	NBS (infancy 35d)	KR	1	1	second liveborn child of unrelated parents with no family history	no	Kang 2015 [825]	abstract asymptomatic, page 156 'did demonstrate failure to thrive'	M	normal development (5m)	67 (<47) µM	Cit 503.4 (3-35) µM			1
SLC25A15 sum							94	93																94
																	0	0	2	2	11	6	73
[truncated: 9 more columns]
