# Supplementary material for: Human nonsense mutations in primary hyperammonemia – Analysis of publicized patient mutations and variations in general populations in eight disease-causing genes
Source: Research Square preprint supplement (doi:10.21203/rs.3.rs-3090477/v1), 2023-06-23
Supplement: Supplementary file 3 [file 379f0870b6e8b49d1aaa24b6.xlsx]

## Sheet: Table S5
Table S5 Post-neonatal cases a)
	Mutation and Location				Patient data										Laboratory data		Onset and outcome assignment g)																																Ethnicity Match
code	codon	cDNA	protein	another allele b)	onset c)	country-ethnicity	incident d)	case	family history/ inheritance	consanguinity	reference	description e)	sex	clinical course	Max NH3 f)	other data f)	neonatal						NBS	late						child	adult	ND	F- OTC	neonateal	late					child	adult	E/Ch	NS	ND					jMorp
																		De	Sy	Al	Cu	ND			De	Sy	Al	Cu	ND							De	Sy	Cu	ND										38KJPN
CPS1-09 -01	478	c.1432C>T	p.Gln478* _ochre	p.Ile1452Thr	late	US	1	1		no	Eeds 2006 [204]	Table1 8			ND									1					1
CPS1-22 -01	1033	c.3097C>A	p.Glu1033* _ochre	p.Gly401Arg p.Ile937Asn	adult (42y)	Fr	1	1	ND	ND	Toquet 2021 [218E]	Tables1&2 26	M	Triggered by surgery	800 µM												1				1																		0.000168
CPS1-28 -01	1262	c.3784C>T	p.Arg1262* _opal	p.Val1141Gly	late (13y)	JP	1	1	ND	no	Wakutani 2004 [222]	PT3 see Kurokawa 2007 Table1 21 Kido2021Table 2 17	F	hyperammonaemic encephalopathy (13y)	1552 (Kido2021)									0		1				1																			0.000168
CPS1-29 -01	1315	c.3945G>A	p.Trp1315* _opal	p.Arg587His	infancy (11m12d)	CN	1	1	siblings and other family members all healthy	no	Fan 2019 [226]	Tables1&2 4	M	moderate developmental delay (4y8m)	133.9 (9-33) µM	Cit 4.094 (7-35) µM								1		1
CPS1-31 -01	1410	c.4229G>A	p.Trp1410* _amber	Not found	Referred at age 22	CH	1	1	ND	ND	Kretz 2012 [220]	Table2 3 page377			ND									0			1				1
OTC-35 -01	265	c.794G>A	p.Trp265* _amber	-	late (4.3y), death	CN	1	1	no, de novo	ND	Lu 2020 [306]	Tables1&3 20	M	death (4.3y)	350 µM	Cit 1.77 (7-35) µM ALT 1455 (9-52) U/L								0	1					1
CPS1 + OTC							1	1									0						0	2						2	2	0	0	0	0					0	0	0	0	0
																		0	0	0	0	0			1	2	2	0	1							0	0	0	0
ASS1-08 -03	279	c.835C>T	p.Arg279* _opal	p.Arg265His	late (3y)	JP	1	1	heterozygote (Table 1)	ND	Gao 2003 [407]	Table1 P378			170 (10-60) µM	Cit 1672 (10-50) µM								0			1			1
ASL-02 -01	98	c.292G>T	p.Glu98* _amber	p.Val117Glyfs*3	tested at 2y	CH-USA	1	1	ND	ND	Balmer 2014 [502]	TableS2 35			ND									1					1
ASL-07 -08	182	c.544C>T	p.Arg182* _opal	p.Glu258Lys	late (after 28d of birth)	UK	1	1	ND	ND	Baruteau 2017 [509]	Table2 8			ND									1					1																				5.2e-05
ASL-08 -06	213	c.637C>T	p.Arg213* _opal	p.Val434Leu	late (2y)	IN	1	1	no	no	Bijarnia-Mahay 2018 [511A]	Dataset1 69	F	mild developmental delay with liver disease	115 µM									1		1
ASL-08 -07	213	c.637C>T	p.Arg213* _opal	p.Lys69Arg	late (16m); 4x tonic seizures over 10 days	CN-Han	1	1	normal parents	ND	Zhao 2019 [512]	page2	M	death after a serious infection (2y)	ND	Cit 220.94 (7-35) µM								1	1
ASL-09 -02	217	c.649C>T	p.Arg217* _opal	p.Asp120Glu	tested at 1.5m	CH-USA	1	1	ND	ND	Balmer 2014 [502]	TableS2 54			ND									1					1																				1.3e-05
ASL-14 -01	428	c.1284G>A	p.Trp428* _opal	p.Arg456Trp	late (after 28d of birth)	UK	1	1	ND	ND	Baruteau 2017 [509]	Table2 19			ND									1					1
ASS1 + ASL							6	6									0						0	6								0
																		0	0	0	0	0			1	1	1	0	4
ARG1-01 -01	12	c.34G>T	p.Gly12* _opal	p.Gly235Arg	infancy (1y6m)	CN	1	1	parents were healthy	no	Wu 2013 [601]	Table1 4	F	seizures (4y)	107 µM	Arg 90.8 (5-25) µM								1		1
ARG1-02 -01	21	c.61C>T	p.Arg21* _opal	ND	infancy (22m)	PT	1	1	four unrelated	no	Cardoso 1999 [603]	page2 1	F	neurological symptom (4y)	ND	Arg 410 µM								1		1																							3.9e-05
ARG1-02 -02	21	c.61C>T	p.Arg21* _opal	ND	infancy (1m)	PT	1	1	four unrelated	no	Cardoso 1999 [603]	page2 2	F	liver chirrosis (4y)	ND	Arg 1750 µM								1		1																							3.9e-05
ARG1-02 -03	21	c.61C>T	p.Arg21* _opal	ND	infancy (23m)	PT	1	1	four unrelated; 3 and 4 were born in adjacent locations; counted separately	no	Cardoso 1999 [603]	page2 3	M	mild developmental retardation (6y)	ND	Arg 556 µM								1		1																							3.9e-05
ARG1-02 -04	21	c.61C>T	p.Arg21* _opal	ND	infancy (11m)	PT	1	1		no	Cardoso 1999 [603]	page2 4	F	developmental regression (8y)	ND	Arg 1475 µM								1		1																							3.9e-05
ARG1-02 -05	21	c.61C>T	p.Arg21* _opal	homozygote	infancy (6m)	CA-Iraq	1	1	two healthy siblings	first cousins	Jain-Ghai 2011 [604]	page108 index case	M	neuropsychological delay (19m)	739 µM	Arg 841 (53-71) µM								1		1																							3.9e-05
ARG1-02 -07	21	c.61C>T	p.Arg21* _opal	p.Gly74Val	infancy (3y)	BR	1	1		no	Carvalho 2012 [605]	Table1 8	M	severe mental retardation (21y)	ND	Arg 753 (74-129) µM								0		1				1																			3.9e-05
ARG1-02 -08	21	c.61C>T	p.Arg21* _opal	p.Trp122* _amber	infancy (24m)	BR	1	1		no	Carvalho 2012 [605]	Table1 9	M	mild mental retardation (28y)	ND	Arg 567 (74-129) µM								1		1																							3.9e-05
ARG1-02 -09	21	c.61C>T	p.Arg21* _opal	p.Ile11Thr	infancy (4y)	BR	1	1		no	Carvalho 2012 [605]	Table1 11	M	moderate mental retardation (17y)	ND	Arg 355 (74-129) µM								0		1				1																			3.9e-05
ARG1-02 -10	21	c.61C>T	p.Arg21* _opal	homozygote	infancy (3y)	BR	1	1		no	Carvalho 2012 [605]	Table1 12	M	moderate mental retardation (7y)	ND	Arg 685 (74-129) µM								0		1				1																			3.9e-05
ARG1-02 -11	21	c.61C>T	p.Arg21* _opal	homozygote	infancy (17m)	BR	1	1		second cousins	Carvalho 2012 [605]	Table1 13	F	severe mental retardation (13y)	ND	Arg 509 (74-129) µM								1		1																							3.9e-05
ARG1-05 -01	122	c.365G>A	p.Trp122* _amber	p.Gly235Arg	infancy (<9m)	JP	1	1	parents heterozygotic carriers, see Fig.4	no	Uchino 1992 [609] Kido 2021b	Table1 1 case 2	M	mental retardation (7y) bedridden (37y)	217 µM "369 µg/dL"	Arg 644 µM								1		1																							3.9e-05
ARG1-05- -02	122	c.365G>A	p.Trp122* _amber	p.Arg21* _opal	infancy (24m)	BR	1	0		no	Carvalho 2012 [605]	Table1 9	M	mild mental retardation (28y)	ND	Arg 567 (74-129) µM								0																									3.9e-05
ARG1-05- -03	122	c.365G>A	p.Trp122* _amber	p.Ile8Lys	infancy (3m)	DE- Arabic	1	1	healthy parents	no	Amayreh 2014 [610]	page1021	M	seizure (9y6m)	ND									1		1																							3.9e-05
ARG1-05- -04	122	c.365G>A	p.Trp122* _amber	p.Asp274Asn	infancy (30d)	JP	1	1	parents heterozygotic carriers, see Fig.1	no	Yokoi 2021 [611] Kido 2021b	page 1 case 5	M	liver transplantation (1y 5m) normal (14y)	177 µM "301 µg/dL"	Arg 1402.2 (53.6-133.6) µM								1				1																					3.9e-05
ARG1-06- -02	291	c.871C>T	p.Arg291* _opal	c.647_648ins32	infancy (34d)	AT	1	1	older sister and parents healthy	no	Scholl-Bürgi 2008 [613]	S324			>400 µM	Arg 971 µM								1					1
ARG1-06- -03	291	c.871C>T	p.Arg291* _opal	ND	infancy	MY-Malay	1	1		can be first cousins	Mohseni 2014 [614]	Table1 2	M	lost ambulation (9y)	212 µM	Arg 400 (41-114) µM								1		1
ARG1-06- -04	291	c.871C>T	p.Arg291* _opal	homozygote	infancy (1y)	CH-France	1	1			Diez-Fernandez 2018 [607]	Table2 6b		no seizures	ND	Arg 496 µM								1					1
ARG1 sum							18	17									0						0	14						3		0
																		0	0	0	0	0			0	14	0	1	2
SLC25A15-02 -01	89	c.265C>T	p.Gln89* _amber	homozygote	infancy (1y)	IT	1	1	ND	ND	Salvi 2001 [702]	Table H6	F	spastic paraparesis at 8y (44y)	ND									1		1
SLC25A15-03 -01	179	c.535C>T	p.Arg179* _opal	homozygote	mental retardation and spastic gait since infancy, cerebral palsy (11y)	JP	1	1	healthy parents	no	Tsujino 2000 [703]	patient 1(Fig2, 5)	M	first coma (32y), comatose episodes increased (41y)	98.1 µM	Orn 586.1 (47.1-72.5) µM								1		1																							0.000245
SLC25A15-03 -03	179	c.535C>T	p.Arg179* _opal	homozygote	infancy: spastic paraplegia (3y)	JP	1	1	healthy parents	first cousins	Miyamoto 2001 [704]	patient 2	M	lethargy and hyper-ammonemia (10y)	200 (<46) µM "340 µg/dL"	Orn "514 (50-80) µg/dL"								1		1																							0.000245
SLC25A15-03 -06-01	179	c.535C>T	p.Arg179* _opal	homozygote	infancy	IT-Morocco	1	1	Family M	ND	Tessa 2009 [705]	Table1 14, page 746 homozygous	M	lethargy and coma (2y)	96 µM	Orn 493 µM								1		1																							0.000245
SLC25A15-03 -06-02	179	c.535C>T	p.Arg179* _opal	homozygote	infancy	IT-Morocco		1	Family M	ND	Tessa 2009 [705]	Table1 15, page 746 homozygous	M	NA (6y)	ND									1					1																				0.000245
SLC25A15-03 -07, 08	179	c.535C>T	p.Arg179* _opal	homozygous	infancy- (3m to 7y)	CN	2	2	ND	ND	Guan 2017 [706]	English abstract patients 2 and 3		case 2 moderate mental retardation	276 µM	Orn 99.44 (15-100) µM								2		1	1																						0.000245
SLC25A15-04 -01	238	c.712C>T	p.Gln238* _ochre	p.Gly113Ser	infancy (1y)	SE-Caucasian	1	1	mother, daughter, sister heterozygotic carriers	ND	Silfverberg 2018 [707]		M	seizures (1-8y), loss of consciousness (48y)	213 µM	Orn 420 (30-110) µM								1		1
SLC25A15-05 -01	245	c.733A>T	p.Lys245* _ochre	ND	infancy	IT-Algeria	1	1	Family C	ND	Tessa 2009 [705]	Table1 3	M	mental retardation (5y)	370 µM	Orn 822 µM								1		1
SLC25A15-05 -02	245	c.733A>T	p.Lys245* _ochre	ND	infancy (prospective diagnosis at 2m)	IT-Algeria		1	Family C	ND	Tessa 2009 [705]	Table1 4	M	mental retardation (3y)	125 µM	Orn 887 µM								1		1
SLC25A15-06 -01-01	275	c.823C>T	p.Arg275* _opal	homozygote	infancy: deafness (5m), mild developmental delay, partial seizures (2y)	JP	1	1	healthy parents originating from the same district	no	Torisu 2006 [708]	proband	F	deafness (5m), complex partial seizures (2y-), mild mental retardation (6y-) fatty liver (30 y)	140 µg/dL	Orn 373.8 (66.8-104.6) µM								1		1																							1.3e-05
SLC25A15-06 -01-02	275	c.823C>T	p.Arg275* _opal	ND, most likely homozygote	infancy: epilepsy with complex partial seizures (3y)	JP	0	1	healthy parents originating from the same district	no	Torisu 2006 [708]	brother of the proband	M	death by acute encephalopathy (34y)	ND	ND								1	1																								1.3e-05
SLC25A15 sum							9	12									0							12						0	0	0
																		0	0	0	0	0			1	9	1	0	1
[truncated: 5 more columns]
