# Supplementary material for: Human nonsense mutations in primary hyperammonemia – Analysis of publicized patient mutations and variations in general populations in eight disease-causing genes
Source: Research Square preprint supplement (doi:10.21203/rs.3.rs-3090477/v1), 2023-06-23
Supplement: Supplementary file 4 [file b6e6ab8ffc76ed9e83aa465c.xlsx]

## Sheet: Table S7
Table S7 Nonsense variants in populations a)
	Gene	Site	Population b)	Variant name	matched incidence	matched ethnicity c)	excluded c)	recurrence d)	ethnicity-match d)	recurrence e)	ethnicity-match e)	CpG	AF f)
								[groups in Fig. 4A]		[groups in Fig. 4B]	[groups in Fig. S4A]		[y values in Fig. 4 and S4]
recurrent sites	CPS1	Arg787	JPN	CPS1-Arg787_JPN	5	JP[5]		≥3	Yes	≥3	Yes	CpG	3.9e-05
	CPS1	Arg787	NFE	CPS1-Arg787_NFE	1	DE		≤2	Yes	≤2	Yes	CpG	2.9e-05
	CPS1	Arg1262	JPN	CPS1-Arg1262_JPN	3	JP[3]		≥3	Yes	≥3	Yes	CpG	0.000168
	CPS1	Arg1262	NFE	CPS1-Arg1262_NFE	3	US[2] IT		≥3	Yes	≥3	Yes	CpG	1.5e-05
	ASS1	Arg279	NFE	ASS1-Arg279_ NFE	4	US[4]		≥3	Yes	≥3	Yes	CpG	1.5e-05
	ASL	Arg182	NFE	ASL-Arg182_NFE	7	IT[2] US[3]BE UK		≥3	Yes	≥3	Yes	CpG	0.000103
	ASL	Arg217	NFE	ASL-Arg217_NFE	6	US[5] IT		≥3	Yes	≥3	Yes	CpG	7.4e-05
	ASL	Arg217	JPN	ASL-Arg217_JPN	0			0	No	0	No	CpG	1.3e-05
	ARG1	Arg21	NFE	ARG1-Arg21_NFE	10	PT[9] CA	BR[5]	≥3	Yes	≥3	Yes	CpG	1.5e-05
	ARG1	Arg21	JPN	ARG1-Arg21_JPN	0			0	No	0	No	CpG	3.9e-05
	ARG1	Arg291	NFE	ARG1-Arg291_NFE	3	UK AT FR		≥3	Yes	≥3	Yes	CpG	2.9e-05
	SLC25A15	Arg179	JPN	SLC25A15-Arg179_JPN	3	JP[3]		≥3	Yes	≥3	Yes	CpG	0.000245
	SLC25A15	Arg179	EAS	SLC25A15-Arg179_EAS	2	CN[2]		≤2	Yes			CpG	0.000384
	SLC25A15	Arg179	AFR	SLC25A15-Arg179_AFR	1	SN		≤2	Yes			CpG	2.4e-05
	SLC25A15	Arg179	NFE	SLC25A15-Arg179_NFE	1	IT		≤2	Yes	≤2	Yes	CpG	1.5e-05
	SLC25A13	Arg43	NFE	SLC25A13-Arg43_NFE	3	US[3]		≥3	Yes	≥3	Yes	CpG	4.4e-05
	SLC25A13	Arg43	EAS	SLC25A13-Arg43_EAS	0			0	No			CpG	0.000193
	SLC25A13	Arg360	JPN	SLC25A13-Arg360_JPN	4	JP[4]		≥3	Yes	≥3	Yes	CpG	5.2e-05
	SLC25A13	Arg360	NFE	SLC25A13-Arg360_NFE	1	BG		≤2	Yes	≤2	Yes	CpG	2.9e-05
	SLC25A13	Arg605	JPN	SLC25A13-Arg605_JPN	5	JP[5]		≥3	Yes	≥3	Yes	CpG	6.5e-05
	ARG1	Trp122	JPN	ARG1-Trp1212_JPN	2	JP[2]		≤2	Yes	≤2	Yes	nonCpG	3.9e-05
	ARG1	Trp122	AFR	ARG1-Trp1212_AFR	0		BR	0	No			nonCpG	4.8e-05
	SLC25A13	Ser225	JPN	SLC25A13-Ser224_JPN	30	JP[30]		≥3	Yes	≥3	Yes	nonCpG	0.000426
	SLC25A13	Glu601	JPN	SLC25A13-Glu601_JPN	9	JP[9]		≥3	Yes	≥3	Yes	nonCpG	6.5e-05
	Gene	Site	Population	Variant_Name	total incidence	matched ethnicity	excluded	recurrence d)	ethnicity-match d)	recurrence e)	ethnicity-match e)	CpG	AF f)
sporadic sites	CPS1	Tyr140	NFE	CPS1-Tyr140_NFE	1	US		≤2	Yes	≤2	Yes	nonCpG	2.9e-05
	CPS1	Ser953	JPN	CPS1-Ser953_JPN	1	JP		≤2	Yes	≤2	Yes	nonCpG	1.3e-05
	CPS1	Gln1046	NFE	CPS1-Gln1046_NFE	1	IT		≤2	Yes	≤2	Yes	nonCpG	1.5e-05
	CPS1	Tyr1031	JPN	CPS1-Tyr1031_JPN	2	JP		≤2	Yes	≤2	Yes	nonCpG	1.3e-05
	ASS1	Arg344	NFE	ASS1-Arg344_NFE	1	DE		≤2	Yes	≤2	Yes	CpG	1.5e-05
	SLC25A15	Arg275	JPN	SLC25A15-Arg275_JPN	1	JP		≤2	Yes	≤2	Yes	CpG	1.3e-05
	SLC25A15	Arg275	AMR	SLC25A15-Arg275_AMR	0			0	No			CpG	5.9e-05
	SLC25A13	Arg355	NFE	SLC25A13-Arg355_NFE	2	US[2]		≤2	Yes	≤2	Yes	CpG	1.5e-05
	CPS1	Gln188	JPN	CPS1-Gln188_JPN	1		KR	0	JPN_KRCN	0	No	nonCpG	1.3e-05
	CPS1	Arg1174	JPN	CPS1-Arg1174_JPN	1		CN	0	JPN_KRCN	0	No	nonCpG	2.6e-05
	SLC25A13	Trp606	JPN	SLC25A13-Trp606_JPN	1		KR	0	JPN_KRCN	0	No	nonCpG	9e-05
	ASS1	Tyr282	AFR	ASS1-Tyr282_AFR	1		US-Hispanic	0	No			nonCpG	0.000121
	ASS1	Gln357	AFR	ASS1-Gln357_AFR	1	US		≤2	Yes			nonCpG	9.7e-05
	SLC25A13	Arg588	NFE	SLC25A13-Arg588_NFE	1		CN	0	No	0	No	CpG	1.5e-05
	SLC25A13	Arg184	NFE	SLC25A13-Arg184_NFE	4		JP CN[3]	0	No	0	No	CpG	1.5e-05
	SLC25A13	Arg319	NFE	SLC25A13-Arg319_NFE	3		JP CN[2]	0	No	0	No	CpG	1.5e-05
	SLC25A13	Arg467	NFE	SLC25A13-Arg467_NFE	6		CN[6]	0	No	0	No	CpG	1.5e-05
non-overlapping	NAGS	Ser100	AFR	NAGS-Ser100_AFR	0			0	No			nonCpG	4.8e-05
	NAGS	Trp123	AFR	NAGS-Trp123_AFR	0			0	No			nonCpG	2.4e-05
	NAGS	Gln126	JPN	NAGS-Gln126_JPN	0			0	No	0	No	nonCpG	1.3e-05
	NAGS	Ser240	AFR	NAGS-Ser240_AFR	0			0	No			nonCpG	2.4e-05
	NAGS	Tyr424	NFE	NAGS-Tyr424_NFE	0			0	No	0	No	nonCpG	1.5e-05
	NAGS	Tyr473	NFE	NAGS-Tyr473_NFE	0			0	No	0	No	nonCpG	1.5e-05
	NAGS	Lys496	NFE	NAGS-Lys496_NFE	0			0	No	0	No	nonCpG	1.5e-05
	CPS1	Gln188	JPN	CPS1-Gln188_JPN	0			0	No	0	No	nonCpG	1.3e-05
	CPS1	Gln318	JPN	CPS1-Gln318_JPN	0			0	No	0	No	nonCpG	1.3e-05
	CPS1	Gly429	JPN	CPS1-Gly429_JPN	0			0	No	0	No	nonCpG	1.3e-05
	CPS1	Glu440	JPN	CPS1-Glu440_JPN	0			0	No	0	No	nonCpG	1.3e-05
	CPS1	Cys644	NFE	CPS1-Cys644_NFE	0			0	No	0	No	nonCpG	1.5e-05
	CPS1	Tyr872	JPN	CPS1-Tyr872_JPN	0			0	No	0	No	nonCpG	1.3e-05
	CPS1	Glu930	AFR	CPS1-Glu930_AFR	0			0	No			nonCpG	2.4e-05
	CPS1	Gln1368	AFR	CPS1-Gln1368_AFR	0			0	No			nonCpG	2.4e-05
	CPS1	Trp1397	AFR	CPS1-Trp1397_AFR	0			0	No			nonCpG	2.4e-05
	CPS1	Gln1413	EAS	CPS1-Gln1413_EAS	0			0	No			nonCpG	0.000193
	ASS1	Glu373	NFE	ASS1-Glu373_NFE	0			0	No	0	No	nonCpG	1.5e-05
	ASL	Lys69	NFE	ASL-Lys69_NFE	0			0	No	0	No	nonCpG	1.5e-05
	ASL	Trp124	JPN	ASL-Trp124_JPN	0			0	No	0	No	nonCpG	1.3e-05
	ASL	Gln411	JPN	ASL-Gln411_JPN	0			0	No	0	No	nonCpG	1.3e-05
	ASL	Trp450	JPN	ASL-Trp450_JPN	0			0	No	0	No	nonCpG	1.3e-05
	ARG1	Ser199	AMR	ARG1-Ser199_AMR	0			0	No			nonCpG	0.000131
	SLC25A15	Ser174	AFR	SLC25A15-Ser174_AFR	0			0	No			nonCpG	2.4e-05
	SLC25A15	Trp224	NFE	SLC25A15-Trp224_NFE	0			0	No	0	No	nonCpG	1.5e-05
	SLC25A13	Tyr391	NFE	SLC25A13-Tyr391_NFE	0			0	No	0	No	nonCpG	1.5e-05
	SLC25A13	Gln442	JPN	SLC25A13-Gln442_JPN	0			0	No	0	No	nonCpG	1.3e-05
	SLC25A13	Ser619	NFE	SLC25A13-Ser619_NFE	0			0	No	0	No	nonCpG	1.5e-05
	Gene	Site	Population	Variant name	matched incidence	Matched ethnicity	Excluded ethnicity	recurrence of incidence	ethnicity-match	recurrence of incidence	ethnicity-match	CpG	AF f)
													[y values in Fig. S4B]
non-overlapping	NAGS	Gln247	ASJ	NAGS-Gln247_ASJ	0			0	No			nonCpG	0.000867
	ARG1	Glu186	OTH	ARG1-Glu186_OTH	0			0	No			nonCpG	0.000479
	SLC25A15	Arg179	AMI	SLC25A15-Arg179_AMI	0			0	No			CpG	0.0033
	SLC25A13	Gln359	SAS	SLC25A13-Gln359_SAS	0			0	No			nonCpG	0.000207
recurrent	SLC25A13	Arg605	SAS	SLC25A13-Arg605_SAS	0			0	No			CpG	0.00083
sporadic	CPS1	Ser430	POL	CPS1-Ser430_POL	2	PL		≤2	Yes			nonCPG	0.0014

## Sheet: Table S7 (A4)
Table S7 Nonsense variants in populations a)
	Gene	Site	Population b)	Variant name	matched incidence	matched ethnicity c)	excluded c)	recurrence d)	ethnicity-match d)	recurrence e)	ethnicity-match e)	CpG	AF f)
								[groups in Fig. 4A]		[groups in Fig. 4B]	[groups in Fig. S4A]		[y values in Fig. 4 and S4]
recurrent sites	CPS1	Arg787	JPN	CPS1-Arg787_JPN	5	JP[5]		≥3	Yes	≥3	Yes	CpG	3.9e-05
	CPS1	Arg787	NFE	CPS1-Arg787_NFE	1	DE		≤2	Yes	≤2	Yes	CpG	2.9e-05
	CPS1	Arg1262	JPN	CPS1-Arg1262_JPN	3	JP[3]		≥3	Yes	≥3	Yes	CpG	0.000168
	CPS1	Arg1262	NFE	CPS1-Arg1262_NFE	3	US[2] IT		≥3	Yes	≥3	Yes	CpG	1.5e-05
	ASS1	Arg279	NFE	ASS1-Arg279_ NFE	4	US[4]		≥3	Yes	≥3	Yes	CpG	1.5e-05
	ASL	Arg182	NFE	ASL-Arg182_NFE	7	IT[2] US[3]BE UK		≥3	Yes	≥3	Yes	CpG	0.000103
	ASL	Arg217	NFE	ASL-Arg217_NFE	6	US[5] IT		≥3	Yes	≥3	Yes	CpG	7.4e-05
	ASL	Arg217	JPN	ASL-Arg217_JPN	0			0	No	0	No	CpG	1.3e-05
	ARG1	Arg21	NFE	ARG1-Arg21_NFE	10	PT[9] CA	BR[5]	≥3	Yes	≥3	Yes	CpG	1.5e-05
	ARG1	Arg21	JPN	ARG1-Arg21_JPN	0			0	No	0	No	CpG	3.9e-05
	ARG1	Arg291	NFE	ARG1-Arg291_NFE	3	UK AT FR		≥3	Yes	≥3	Yes	CpG	2.9e-05
	SLC25A15	Arg179	JPN	SLC25A15-Arg179_JPN	3	JP[3]		≥3	Yes	≥3	Yes	CpG	0.000245
	SLC25A15	Arg179	EAS	SLC25A15-Arg179_EAS	2	CN[2]		≤2	Yes			CpG	0.000384
	SLC25A15	Arg179	AFR	SLC25A15-Arg179_AFR	1	SN		≤2	Yes			CpG	2.4e-05
	SLC25A15	Arg179	NFE	SLC25A15-Arg179_NFE	1	IT		≤2	Yes	≤2	Yes	CpG	1.5e-05
	SLC25A13	Arg43	NFE	SLC25A13-Arg43_NFE	3	US[3]		≥3	Yes	≥3	Yes	CpG	4.4e-05
	SLC25A13	Arg43	EAS	SLC25A13-Arg43_EAS	0			0	No			CpG	0.000193
	SLC25A13	Arg360	JPN	SLC25A13-Arg360_JPN	4	JP[4]		≥3	Yes	≥3	Yes	CpG	5.2e-05
	SLC25A13	Arg360	NFE	SLC25A13-Arg360_NFE	1	BG		≤2	Yes	≤2	Yes	CpG	2.9e-05
	SLC25A13	Arg605	JPN	SLC25A13-Arg605_JPN	5	JP[5]		≥3	Yes	≥3	Yes	CpG	6.5e-05
	ARG1	Trp122	JPN	ARG1-Trp1212_JPN	2	JP[2]		≤2	Yes	≤2	Yes	nonCpG	3.9e-05
	ARG1	Trp122	AFR	ARG1-Trp1212_AFR	0		BR	0	No			nonCpG	4.8e-05
	SLC25A13	Ser225	JPN	SLC25A13-Ser224_JPN	30	JP[30]		≥3	Yes	≥3	Yes	nonCpG	0.000426
	SLC25A13	Glu601	JPN	SLC25A13-Glu601_JPN	9	JP[9]		≥3	Yes	≥3	Yes	nonCpG	6.5e-05
	Gene	Site	Population	Variant_Name	total incidence	matched ethnicity	excluded	recurrence d)	ethnicity-match d)	recurrence e)	ethnicity-match e)	CpG	AF f)
sporadic sites	CPS1	Tyr140	NFE	CPS1-Tyr140_NFE	1	US		≤2	Yes	≤2	Yes	nonCpG	2.9e-05
	CPS1	Ser953	JPN	CPS1-Ser953_JPN	1	JP		≤2	Yes	≤2	Yes	nonCpG	1.3e-05
	CPS1	Gln1046	NFE	CPS1-Gln1046_NFE	1	IT		≤2	Yes	≤2	Yes	nonCpG	1.5e-05
	CPS1	Tyr1031	JPN	CPS1-Tyr1031_JPN	2	JP		≤2	Yes	≤2	Yes	nonCpG	1.3e-05
	ASS1	Arg344	NFE	ASS1-Arg344_NFE	1	DE		≤2	Yes	≤2	Yes	CpG	1.5e-05
	SLC25A15	Arg275	JPN	SLC25A15-Arg275_JPN	1	JP		≤2	Yes	≤2	Yes	CpG	1.3e-05
	SLC25A15	Arg275	AMR	SLC25A15-Arg275_AMR	0			0	No			CpG	5.9e-05
	SLC25A13	Arg355	NFE	SLC25A13-Arg355_NFE	2	US[2]		≤2	Yes	≤2	Yes	CpG	1.5e-05
	CPS1	Gln188	JPN	CPS1-Gln188_JPN	1		KR	0	JPN_KRCN	0	No	nonCpG	1.3e-05
	CPS1	Arg1174	JPN	CPS1-Arg1174_JPN	1		CN	0	JPN_KRCN	0	No	nonCpG	2.6e-05
	SLC25A13	Trp606	JPN	SLC25A13-Trp606_JPN	1		KR	0	JPN_KRCN	0	No	nonCpG	9e-05
	ASS1	Tyr282	AFR	ASS1-Tyr282_AFR	1		US-Hispanic	0	No			nonCpG	0.000121
	ASS1	Gln357	AFR	ASS1-Gln357_AFR	1	US		≤2	Yes			nonCpG	9.7e-05
	SLC25A13	Arg588	NFE	SLC25A13-Arg588_NFE	1		CN	0	No	0	No	CpG	1.5e-05
	SLC25A13	Arg184	NFE	SLC25A13-Arg184_NFE	4		JP CN[3]	0	No	0	No	CpG	1.5e-05
	SLC25A13	Arg319	NFE	SLC25A13-Arg319_NFE	3		JP CN[2]	0	No	0	No	CpG	1.5e-05
	SLC25A13	Arg467	NFE	SLC25A13-Arg467_NFE	6		CN[6]	0	No	0	No	CpG	1.5e-05
non-overlapping	NAGS	Ser100	AFR	NAGS-Ser100_AFR	0			0	No			nonCpG	4.8e-05
	NAGS	Trp123	AFR	NAGS-Trp123_AFR	0			0	No			nonCpG	2.4e-05
	NAGS	Gln126	JPN	NAGS-Gln126_JPN	0			0	No	0	No	nonCpG	1.3e-05
	NAGS	Ser240	AFR	NAGS-Ser240_AFR	0			0	No			nonCpG	2.4e-05
	NAGS	Tyr424	NFE	NAGS-Tyr424_NFE	0			0	No	0	No	nonCpG	1.5e-05
	NAGS	Tyr473	NFE	NAGS-Tyr473_NFE	0			0	No	0	No	nonCpG	1.5e-05
	NAGS	Lys496	NFE	NAGS-Lys496_NFE	0			0	No	0	No	nonCpG	1.5e-05
	CPS1	Gln188	JPN	CPS1-Gln188_JPN	0			0	No	0	No	nonCpG	1.3e-05
	CPS1	Gln318	JPN	CPS1-Gln318_JPN	0			0	No	0	No	nonCpG	1.3e-05
	CPS1	Gly429	JPN	CPS1-Gly429_JPN	0			0	No	0	No	nonCpG	1.3e-05
	CPS1	Glu440	JPN	CPS1-Glu440_JPN	0			0	No	0	No	nonCpG	1.3e-05
	CPS1	Cys644	NFE	CPS1-Cys644_NFE	0			0	No	0	No	nonCpG	1.5e-05
	CPS1	Tyr872	JPN	CPS1-Tyr872_JPN	0			0	No	0	No	nonCpG	1.3e-05
	CPS1	Glu930	AFR	CPS1-Glu930_AFR	0			0	No			nonCpG	2.4e-05
	CPS1	Gln1368	AFR	CPS1-Gln1368_AFR	0			0	No			nonCpG	2.4e-05
	CPS1	Trp1397	AFR	CPS1-Trp1397_AFR	0			0	No			nonCpG	2.4e-05
	CPS1	Gln1413	EAS	CPS1-Gln1413_EAS	0			0	No			nonCpG	0.000193
	ASS1	Glu373	NFE	ASS1-Glu373_NFE	0			0	No	0	No	nonCpG	1.5e-05
	ASL	Lys69	NFE	ASL-Lys69_NFE	0			0	No	0	No	nonCpG	1.5e-05
	ASL	Trp124	JPN	ASL-Trp124_JPN	0			0	No	0	No	nonCpG	1.3e-05
	ASL	Gln411	JPN	ASL-Gln411_JPN	0			0	No	0	No	nonCpG	1.3e-05
	ASL	Trp450	JPN	ASL-Trp450_JPN	0			0	No	0	No	nonCpG	1.3e-05
	ARG1	Ser199	AMR	ARG1-Ser199_AMR	0			0	No			nonCpG	0.000131
	SLC25A15	Ser174	AFR	SLC25A15-Ser174_AFR	0			0	No			nonCpG	2.4e-05
	SLC25A15	Trp224	NFE	SLC25A15-Trp224_NFE	0			0	No	0	No	nonCpG	1.5e-05
	SLC25A13	Tyr391	NFE	SLC25A13-Tyr391_NFE	0			0	No	0	No	nonCpG	1.5e-05
	SLC25A13	Gln442	JPN	SLC25A13-Gln442_JPN	0			0	No	0	No	nonCpG	1.3e-05
	SLC25A13	Ser619	NFE	SLC25A13-Ser619_NFE	0			0	No	0	No	nonCpG	1.5e-05
	Gene	Site	Population	Variant name	matched incidence	Matched ethnicity	Excluded ethnicity	recurrence of incidence	ethnicity-match	recurrence of incidence	ethnicity-match	CpG	AF f)
													[y values in Fig. S4B]
non-overlapping	NAGS	Gln247	ASJ	NAGS-Gln247_ASJ	0			0	No			nonCpG	0.000867
	ARG1	Glu186	OTH	ARG1-Glu186_OTH	0			0	No			nonCpG	0.000479
	SLC25A15	Arg179	AMI	SLC25A15-Arg179_AMI	0			0	No			CpG	0.0033
	SLC25A13	Gln359	SAS	SLC25A13-Gln359_SAS	0			0	No			nonCpG	0.000207
recurrent	SLC25A13	Arg605	SAS	SLC25A13-Arg605_SAS	0			0	No			CpG	0.00083
sporadic	CPS1	Ser430	POL	CPS1-Ser430_POL	2	PL		≤2	Yes			nonCPG	0.0014
