# Supplementary material for: Human nonsense mutations in primary hyperammonemia – Analysis of publicized patient mutations and variations in general populations in eight disease-causing genes
Source: Research Square preprint supplement (doi:10.21203/rs.3.rs-3090477/v1), 2023-06-23
Supplement: Supplementary file 5 [file d406b708b8f465ac039007f6.xlsx]

## Sheet: Dataset 3
Datset 3 Nonsense variants in large-scaled population studies a)
	Mutation and Location					jMorp	gnomAD						Number of alleles c)								Clinical data					Database				J-morp JPN	J-morp JPN
code	codon	cDNA	protein	GRCh38	MANE select transcript b)	JPN	AFR	AMR	EAS	NFE	OTH	OTH-ethnicity	JPN 38722	AFR 20744	AMR 7647	EAS 2604	NFE 34029	OTH	OTH-ethnicity	TOTAL 114878	onset	country	family	case	references	population study	HGMD	ClinVar	dbSNP	8.3K	14K
NAGS	100	c.299C>A	p.Ser100* _amber	chr17:44004962	MANE		4.8e-05							2						2						gnomAd v3.1.2 AFR
NAGS	123	c.369G>A	p.Trp123* _opal	chr17:44005032	MANE		2.4e-05							1						1						gnomAd v3.1.2 AFR			rs1457207409 A=0.00000 (AFR 0.00002)
NAGS	126	c.376C>T	pGln126* _amber	chr17:44005039	MANE	1.3e-05							1							1						jMorp 38KJPN
NAGS	240	c.719C>A	p.Ser240* _amber	chr17:44006041	MANE		2.4e-05							1						1						gnomAd v3.1.2 AFR
NAGS	247	c.739C>T	p.Gln247* _amber	chr17:44006061	MANE						0.000867	ASJ						3	ASJ	3						gnomAd v3.1 ASJ			rs748875458 T=0.00007
NAGS	424	c.1272C>G	p.Tyr424* _amber	chr17:44007594	MANE					1.5e-05							1			1						gnomAd v3.1 NFE			rs1214956593 A=0.00000, G=0.00003
NAGS	473	c1419G>A	p.Trp473* _opal	chr17:44007741	MANE					1.5e-05							1			1						gnomAd v3.1 NFE			rs1039703404 A=0.00000
NAGS	496	c1486A>T	p.Lys496* _amber	chr17:44008482	MANE					1.5e-05							1			1						gnomAd v3.1 NFE			rs1171508087 T=0.0002
CPS1-03	140	c.420C>A	p.Tyr140* _ochre	chr2:210577459	MANE					2.9e-05							2			2	neonatal	US	1	1	Eeds 2006	gnomAd v3.1.2 NFE	CM063934	1361235; pathogenic	rs772576138 A=0.00000, *T=0.00000
CPS1-04	188	c.562C>T	p.Gln188* _amber	chr2:210582650	MANE	1.3e-05							1							1	neonatal (4d)	KR	1	1	Choi 2017	jMorp 14-38KJPN	CM170029				4e-05
CPS1	318	c.952C>T	p.Gln318* _amber	chr2:210591835	MANE	1.3e-05							1							1						jMorp 8.3-38KJPN				0.0001	4e-05
CPS1	429	c.1285G>T	p.Gly429* _opal	chr2:210595508	MANE	1.3e-05							1							1						[jMorp 38KJPN]
CPS1	440	c.1318G>T	p.Glu440* _ochre	chr2:210591835	MANE	1.3e-05							1							1						jMorp 8.3-38KJPN				0.0001	4e-05
CPS1	644	c.1932T>A	p.Cys644* _opal	chr2:210605197	MANE					1.5e-05							1			1						gnomAd v3.1 NFE	CM219601	984186; likely pathogenic	rs1251623714 *A=0.00000
CPS1-16	787	c.2359C>T	p.Arg787* _opal	chr2:210608527	MANE	3.9e-05				2.9e-05			3				2			5	neonatal (3d, 2d)	DE JP [2] JP JP [2]	6	6	Rapp 2001 Kurokawa 2007 Sugiyama 2020 Kido 2021	jMorp 14-38KJPN gnomAd v3.1.2 NFE	CM071660	2426; pathogenic	rs121912596 T=0.00000	0.0001	7e-05
CPS1	872	c.2616C>G	p.Tyr872* _amber	chr2:210616470	MANE	1.3e-05							1							1						[jMorp 38KJPN]
CPS1	930	c.2788G>T	p.Glu930* _amber	chr2:210637802	MANE		2.4e-05							1						1						gnomAd v3.1.2 AFR			rs1424820114 T=0.00007 (African 0.0003)
CPS1-18	953	c.2858C>A	p.Ser953* _ochre	chr2:210639178	MANE	1.3e-05							1							1	neonatal	JP	1	1	Kido 2021 Pt7	jMorp 14-38KJPN	CM2112797				4e-05
CPS1-21	1031	c.3093C>A	p.Tyr1031* _ochre	chr2:210642617	MANE	1.3e-05							1							1	neonatal (2d) neonatal	JP JP	2	2	Kurokawa 2007 Kido 2021	jMorp38K	CM071669				4e-05
CPS1-23	1046	c.3136C>T	p.Gln1046* _amber	chr2:210642660	MANE					1.5e-05							1			1	neonatal (2d)	AT-Italian	1	1	Rokicki 2017	gnomAd v3.1.2 NFE	CM1719732
CPS1-26	1174	c.3520C>T	p.Arg1174* _opal	chr2:210654064	MANE	2.6e-05							2							2	ND neonatal (3d, 4d) neonatal (2d)	CH CH [2] CN	4	4	Häberle 2011 Kretz 2012 Liu 2021	jMorp 8.3-38KJPN	CM114398	1076647; pathogenic	rs756337473 A=0.00000, T=0.00005 (European T=0.00006)	0.0001	4e-05
CPS1-28	1262	c.3784C>T	p.Arg1262* _opal	chr2:210660512	MANE	0.000168				1.5e-05			13				1			14	late (13y) neonatal neonatal (2d) perineonatal (1m) neonatal (1d) neonatal (1d)	JP US [2] JP JP IT CN	7	8	Wakutani 2004 Eeds 2006 Kurokawa 2007 Ono 2009 Funghini 2012 Zhou 2020	jMorp 8.3-38KJPN gnomAd v3.1.2 NFE	CM042962	552571; pathogenic	rs1414143303 T=0.00000	0.0001	0.00011
CPS1	1368	c.4102C>T	p.Gln1368* _ochre	chr2:210674902	MANE		2.4e-05							1						1						gnomAd v3.1.2 AFR			rs1180519617 T=0.00000 (African 0.00002)
CPS1	1397	c.4191G>A	p.Trp1397* _opal	chr2:210675757	MANE		2.4e-05							1						1						gnomAd v3.1.2 AFR
CPS1	1413	c.4237C>T	p.Gln1413* _ochre	chr2:210675803	MANE				0.000193							1				1						gnomAd v3.1.2 EAS
ASS1-08	279	c.835C>T	p.Arg279* _opal	chr9:130480446	MANE		2.4e-05			1.5e-05				1			1			2	ND[2] late (3y) NBS neonatal	TW-USA[2] JP US US	5	5	Li 2001 Gao 2003 Dimmock 2006 Miller 2014	gnomAd v3.1.2 AFR NFE Capalbo2019	CM012587	6333; pathogenic/ likely pathogenic	rs121908645 T=0.000052 (European 0.000055)
ASS1-09	282	c.846C>A	p.Tyr282* _ochre	chr9:130489340	MANE		0.000121							5						5	severe developmental delays	US-hispanic	1	1	Ruxmohan 2021	gnomAd v3.1.2 AFR
ASS1-11	344	c.1030C>T	p.Arg344* _opal	chr9:130494926	MANE					1.5e-05							1			1	ND	DE-Germany	1	1	Engel2009	gnomAd v3.1.2 NFE	CM091427
ASS1-12	357	c.1069C>T	p.Gln357* _amber	chr9:130494965	MANE		9.7e-05							4						4	neonatal	US	1	1	Miller2014	gnomAd v3.1.2 AFR	CM146380	528373; pathogenic/ likely pathogenic	rs756859126 T=0.00007 (African 0.0003, African American 0.0004)
ASS1	373	c.1117G>T	p.Glu373* _amber	chr9:130495013	MANE					1.5e-05							1			1					Hou2020	gnomAd v3.1.2 NFE Hou2020 Dataset sheet3 1308			rs1453708640 T=0.00000
ASL	69	c.205A>T	p.Lys69* _amber	chr7:66081995	MANE					1.5e-05							1			1						gnomAD v3.1.2 NFE
ASL	124	c.371G>A	p.Trp124* _amber	chr7:66083099	MANE	1.3e-05							1							1						jMorp 38KJPN		984301; likely pathogenic	rs1786558070
ASL-07	182	c.544C>T	p.Arg182* _opal	chr7:66086763	MANE	5.2e-05				0.000103			4				7			11	neonatal neonatal neonatal late neonatal	IT [2] SA CH-US[3]+Belgian UK CN	9	9	Trevisson 2007, 2009 Imatiaz 2010 Balmer 2014 Baruteau 2017 Zhang 2019	jMorp 14-38KJPN gnomAD v3.1.2 NFE	CM072864	92362; pathogenic	rs398123126 T=0.00008 (European T=0.00011)		4e-05
ASL-09	217	c.649C>T	p.Arg217* _opal	chr7:66087380	MANE	1.3e-05		6.6e-05		7.4e-05			1		1		5			7	neonatal NBS[3 3] neonatal(4d)	CH-US[5]+Italian IN	7	7	Balmer 2014 Bijarnia-Mahay 2018	jMorp 14-38KJPN gnomAD v3.1.2 AFR NFE OTH	CM141233	203615; pathogenic	rs369879957 T=0.00007 (European 0.00009)		4e-05
ASL	411	c.1231C>T	p.Gln411* _amber	chr7:66092644	MANE	1.3e-05							1							1						jMorp 8.3-38KJPN				0.0001	4e-05
ASL	450	c.1350G>A	p.Trp450* _opal	chr7:66092867	MANE	1.3e-05							1							1						jMorp 14-38KJPN					4e-05
ASL(!)	465	c.1395G>A	p.*_amber465* _ochre	chr7:66092912	MANE , termination codon	0.000142							11							11						jMorp 8.3-38KJPN				0.0002	0.00028
CumSum (MANE CDS)													34	17	1	1	26	3		82
ARG1+	-/20+	c.58C>T ENST00000672233.1	p.Arg20* _opal	chr6:131547180	+					5.9e-05							4			4						gnomAD v3.1 NFE
ARG1-02	21	c.61C>T	p.Arg21* _opal	chr6:131576666	MANE	3.9e-05				1.5e-05			3				1			4	infancy (1~23m) infancy (6m) etc. infancy (17m~4y) NBS childhood (7 13y)	PT [4] CA [2]-Iraqi ND BR [5] PT [5] CH-Turkey [2]	18	18	Cardoso 1999 Jain-Ghai 2011 Carvalho 2012 Rodrigues 2014 Diez-Fernandez 2018	jMorp 14K38K gnomAD v3.1.2 NFE	CM993111	2397; pathogenic	rs104893944; T=0.00006 (European 0.00008)		4e-05
ARG1-05	122	c.365G>A	p.Trp122* _amber	chr6:131581278	MANE	3.9e-05	4.8e-05						3	2						5	infancy (<9m) infancy (24m) infancy (3m) infancy (30d)	JP BR DE- Arabic JP	4	4	Uchino 1992 Carvalho 2012 Amayreh 2014 Yokoi 2021	jMorp 8.3-38KJPN gnomAD v3.1.2 AFR	CM920104	2390; pathogenic	rs104893947; T=0.000010 (African 0.0002, African American 0.0002)	0.0001	4e-05
ARG1	186	c.556G>T	p.Glu186* _ochre	chr6:131582711	MANE						0.000479	Other						1	Other	1						gnomAD v3.1 Other
ARG1	199	c.596C>A	p.Ser199* _ochre	chr6:131583095	MANE			0.000131							2					2						gnomAD v3.1 AMR
ARG1-06	291	c.871C>T	p.Arg291* _opal	chr6:131583810	MANE		4.8e-05			2.9e-05				2			2			4	neonatal infancy (34d) infancy infancy (1y)	UK-German-French AT MY CH-France	4	4	Grody 1992 Scholl-Bürgi 2008 Mohseni 2014 Diez-Fernandez 2018	gnomAD v3.1.2 AFR NFE	CM920106	2388; pathogenic/ likely pathogenic	rs104893940; T=0.000060 (European 0.000060)
SLC25A15	174	c.521C>A	p.Ser174* _ochre	chr13:40807362	MANE		2.4e-05							1						1						gnomAD v3.1.2 AFR
SLC25A15-03	179	c.535C>T	p.Arg179* _opal	chr13:40807376	MANE	0.000245	2.4e-05		0.000384	1.5e-05	0.003297	AMI	19	1		2	1	3	AMI	26	infancy infancy (3y) etc. childhood neonatal etc. infancy~ (3m 7y)	JP JP [2] IT IT-Senegal, Morocco CN [2]	8	10	Tsujino 2000 Miyamoto 2001 Salvi 2001 Tessa 2009 Guan 2017	jMorp 8.3-38KJPN gnomAD v3.1.2 AFR EAS NFE AMI	CM001338	5994; pathogenic	rs104894429; T=0.000038 (European 0.00001, Asian 0.0009)	0.0002	0.00028
SLC25A15	224	c.671G>A	p.Trp224* _amber	chr13:40808486	MANE					1.5e-05							1			1						gnomAD v3.1.2 NFE			rs1339837152 A=0.00000 (European 0.00001)
SLC25A15-06	275	c.823C>T	p.Arg275* _opal	chr13:40809584	MANE	1.3e-05		0.00059					1		9					10	infancy~ (5m 3y)	JP	1	2	Torisu 2006	jMorp 38KJPN gnomAD v3.1.2 AMR Capalbo2019 carrier	CM065465	38403; Likely pathogenic	rs202247807; T=0.000015		! 0.00004
total (MANE CDS)													60	23	12	3	31	7		136
SLC25A13+	-/10+	c.29+ G>A XM_017011663	p.Trp10+ * _opal	chr7:96284794	+					1.5e-05							1			1						gnomAD v3.1.2 NFE
SLC25A13+	-/26+	c.76+ G>T XM_017011663	p.Glu26+ * _amber	chr7:96284747	+	1.3e-05							1							1						jMorp 38KJPN
SLC25A13-03	43	c.127C>T	p.Arg43* _opal	chr7:96277281	MANE				0.000193	4.4e-05						1	3			4	NICCD (6w) etc.	US-French-Canadian	3	4	Dimmock 2009	gnomAD v3.1.2 EAS NFE	CM090576		rs780525233 *A=0.00000 (gnoMAD European 0.000029, East Asian 0.0003)
SLC25A13-08	184	c.550C>T	p.Arg184* _opal	chr7:96193102	MANE					1.5e-05							1			1	NICCD NICCD	JP CN [3]	4	4	Kobayashi 2003 Lin 2016	gnomAD v3.1.2 NFE	CM034750	21515; pathogenic	rs80338716 A=0.000061 Euro. 0.000062
SLC25A13-10	225	c.674C>A	p.Ser225* _amber	chr7:96191189	MANE	0.000426							33							33	CTLN2 (adult) CTLN2 CTLN2 (24y) CTLN2 (adult) NICCD NICCD CTLN2 (74y) NICCD (1~10m) CTLN2 (62y)	JP [2] JP JP CN-Japanese JP JP [6] JP JP [20]	30	34	Kobayashi 1999 Tanaka 2002 Takahashi 2006 Song 2013 Togawa 2016 Hirayama 2018 Suzuki 2019 Kido 2022	jMorp 8.3-38KJPN	CM991267	6004; pathogenic	rs80338719 A=0.00011 Euro. 0.00011 African 0.00012	0.0004	0.00025
SLC25A13+	312+	c.934C>T	p.Gln312* _amber	chr7:96185014	+		4.8e-05			0.000191				2			13			15						gnomAD v3.1.2 AFR NFE
SLC25A13-14	319	c.958C>T	p.Arg319* _opal	chr7:96184990	MANE					1.5e-05							1			1	NICCD NICCD NICCD (0m)	JP-Chinese, Hebei CN JP	3	3	Song 2008 Lin 2016 Kido 2022	gnomAD v3.1.2 NFE	CM087351	372748; pathogenic	rs763191789 A=0.00000
SLC25A13-15	355	c.958C>T	p.Arg355* _opal	chr7:96184391	MANE					1.5e-05							1			1	NICCD (6w) etc.	US-French-Canadian	2	3	Dimmock 2009	gnomAD v3.1.2 NFE Capalbo2019 carrier	CM090577	449394; Pathogenic(2); Uncertain significance(1)	rs758827458 A=0.00007 Euro. 0.0001 *C=0.00000
SLC25A13	359	c.1075C>T	p.Gln359* _ochre	chr7:96184379	MANE						0.000207	SAS						1	SAS	1						gnomAD v3.1 South Asia			rs1794541339 A=0.00000
SLC25A13-16	360	c.958C>T	p.Arg360* _opal	chr7:96184376	MANE	5.2e-05				2.9e-05			4				2			6	NICCD NICCD NICCD NICCD NICCD NICCD (0~5m)	JP BG CN [3] JP CN JP [2]	9	9	Tabata 2008 Avdjieva-Tzavella 2014 Lin 2016 Togawa 2016 Fang 2021 Kido 2022	jMorp 38KJPN gnomAD v3.1.2 NFE	CM081806	21508; pathogenic/ likely pathogenic	rs80338721 A=0.000049 Euro. 0.000054
SLC25A13	391	c.1173T>G	p.Tyr391* _amber	chr7:96184281	MANE					1.5e-05							1			1						gnomAD v3.1 NFE			rs762925301 C=0.00000
SLC25A13	442	c.1324C>T	p.Gln442* _amber	chr7:96146684	MANE	1.3e-05							1							1						jMorp 38KJPN
SLC25A13-19	467	c.1402C>T	p.Arg467* _opal	chr7:96146609	MANE					1.5e-05							1			1	NICCD NICCD	CN [5] CN	6	6	Lin 2016 Lin 2020	gnomAD v3.1.2 NFE	CM103907	939098; pathogenic	rs540149539 A=0.00000
SLC25A13-20	549	c.1648C>T	p.Gln549* _amber	chr7:96121944	MANE	0.000142							11							11	CTLN2 (adult)	CN-Japanese	1	1	Song 2013	jMorp 8.3-38KJPN	CM139594		rs1364726997 8.3K A=0.00006	0.0001	0.00011
SLC25A13-23	588	c.1765C>T	p.Arg588* _opal	chr7:96121734	MANE					1.5e-05							1			1	NICCD	CN	1	1	Lin 2020	gnomAD v3.1.2 NFE	CM207699	664925; pathogenic	rs1261058897 A=0.00000
SLC25A13-24	601	c.1804G>T	p.Glu601* _ochre	chr7:96121695	MANE	6.5e-05							5							5	NICCD (2m) NICCD CTLN2 (48y) NICCD (1~2m) FTTDCD (2y) CTLN2 (48y)	JP JP JP JP [4] JP JP	9	9	Hayasaka2012 Hirayama2018 Hayasaka2018 Kido 2022	jMorp 8.3-38KJPN	CM020187	21513; pathogenic	rs80338727 *T=0.00000 8.3K A=0.00012	0.0001	0.00011
SLC25A13-25	605	c.1816C>T	p.Arg605* _opal	chr7:96121683	MANE	6.5e-05					0.00083	SAS	5					4	SAS	9	CTLN2 (adult) hypoketotic hypoglycemia(1y) NICCD NICCD (1m) etc.	JP JP CN JP [3]	6	6	Yasuda 2000 Wada 2020 Fang 2021 Kido 2022	jMorp 8.3-38KJPN gnomAD v3.1.2 SAS	CM003063,	21514; pathogenic	rs80338729 A=0.00000	0.0001	0.00011
SLC25A13-26	606	c.1820G>A	p.Trp606* _amber	chr7:96121679	MANE	9e-05							7							7	NBS (infancy 35d)	KR	1	1	Kang 2015	jMorp 14-38KJPN	CM1517418				4e-05
SLC25A13-*	619	c.1859C>G	p.Ser619* _opal	chr7:96121363	MANE					1.5e-05							1			1	Prostate adenoca.				{Huang2018 prostate adenoca.}	gnomAD v3.1.2 NFE	CM1827664	ND	rs1220401209
total (SLC25A13)													66	0	0	1	12	5		84
total (all)													126	23	12	4	43	12		220
