# Supplementary material for: Human nonsense mutations in primary hyperammonemia – Analysis of publicized patient mutations and variations in general populations in eight disease-causing genes
Source: Research Square preprint supplement (doi:10.21203/rs.3.rs-3090477/v1), 2023-06-23
Supplement: Supplementary file 6 [file e40bdcdf4fa73f809918d9a7.docx]

**Supplementary References for Dataset**

List of 140 publications cited in Datasets 1 and 2 in order of appearance in the datasets.

Cross-disease citation (presented by suffixes -A to -F; 6 refs)

A Bijarnia-Mahay S, Häberle J, Jalan AB, Puri RD, Kohli S, Kudalkar K, et al. Urea cycle disorders in India: clinical course, biochemical and genetic investigations, and prenatal testing. Orphanet J Rare Dis 2018;13:174. PMID: 30285816.

B Kido J, Matsumoto S, Sugawara K, Sawada T, Nakamura K. Variants associated with urea cycle disorders in Japanese patients: Nationwide study and literature review. Am J Med Genet A 2021;185:2026–36. PMID: 33851512.

C Staretz-Chacham O, Daas S, Ulanovsky I, Blau A, Rostami N, Saraf-Levy T, et al. The role of orotic acid measurement in routine newborn screening for urea cycle disorders. J Inherit Metab Dis 2021;44:606–17. PMID: 33190319.

D Makris G, Lauber M, Rüfenacht V, Gemperle C, Diez-Fernandez C, Caldovic L, et al. Clinical and structural insights into potential dominant negative triggers of proximal urea cycle disorders. Biochimie 2021;183:89–99. PMID: 33309754.

E Toquet S, Spodenkiewicz M, Douillard C, Maillot F, Arnoux J-B, Damaj L, et al. Adult-onset diagnosis of urea cycle disorders: Results of a French cohort of 71 patients. J Inherit Metab Dis 2021;44:1199–214. PMID: 34014557.

F Zhang W, Yang Y, Peng W, Chang J, Mei Y, Yan L, et al. A 7-Year Report of Spectrum of Inborn Errors of Metabolism on Full-Term and Premature Infants in a Chinese Neonatal Intensive Care Unit. Front Genet 2019;10:1302. PMID: 31998365.

1. NAGS deficiency (5 refs)

101A Bijarnia-Mahay S, Häberle J, Jalan AB, Puri RD, Kohli S, Kudalkar K, et al. Urea cycle disorders in India: clinical course, biochemical and genetic investigations, and prenatal testing. Orphanet J Rare Dis 2018;13:174. PMID: 30285816.

102 Caldovic L, Morizono H, Panglao MG, Cheng SF, Packman S, Tuchman M. Null mutations in the N-acetylglutamate synthase gene associated with acute neonatal disease and hyperammonemia. Hum Genet 2003;112:364–8. PMID: 12594532.

103 Gessler P, Buchal P, Schwenk HU, Wermuth B. Favourable long-term outcome after immediate treatment of neonatal hyperammonemia due to N-acetylglutamate synthase deficiency. Eur J Pediatr 2010;169:197–9. PMID: 19533169.

104 Reigstad H, Woldseth B, Häberle J. Normal Neurological Development During Infancy Despite Massive Hyperammonemia in Early Treated NAGS Deficiency. JIMD Rep 2017;37:45–7. PMID: 28275973.

105 Sancho-Vaello E, Marco-Marín C, Gougeard N, Fernández-Murga L, Rüfenacht V, Mustedanagic M, et al. Understanding N-Acetyl-L-Glutamate Synthase Deficiency: Mutational Spectrum, Impact of Clinical Mutations on Enzyme Functionality, and Structural Considerations. Hum Mutat 2016;37:679–94. PMID: 27037498.

2. CPS1 deficiency (26 refs+1)

201 Ihara K, Nakayama H, Hikino S, Hara T. Human Gene Mutations Gene Symbol: CPS1; Disease: Carbamoylphosphate synthase 1 deficiency. Hum Genet 1999;105:375. Not available in PubMed.

202 Kurokawa K, Yorifuji T, Kawai M, Momoi T, Nagasaka H, Takayanagi M, et al. Molecular and clinical analyses of Japanese patients with carbamoylphosphate synthetase 1 (CPS1) deficiency. J Hum Genet 2007;52:349–54. PMID: 17310273.

203 Häberle J, Shchelochkov OA, Wang J, Katsonis P, Hall L, Reiss S, et al. Molecular defects in human carbamoy phosphate synthetase I: mutational spectrum, diagnostic and protein structure considerations. Hum Mutat 2011;32:579–89. PMID: 21120950.

204 Eeds AM, Hall LD, Yadav M, Willis A, Summar S, Putnam A, et al. The frequent observation of evidence for nonsense-mediated decay in RNA from patients with carbamyl phosphate synthetase I deficiency. Mol Genet Metab 2006;89:80–6. PMID: 16737834.

205 Choi R, Park HD, Yang M, Ki CS, Lee SY, Kim JW, et al. Novel Pathogenic Variant (c.580C>T) in the CPS1 Gene in a Newborn With Carbamoyl Phosphate Synthetase 1 Deficiency Identified by Whole Exome Sequencing. Ann Lab Med 2017;37:58–62. PMID: 27834067.

206 Häberle J, Schmidt E, Pauli S, Rapp B, Christensen E, Wermuth B, et al. Gene structure of human carbamylphosphate synthetase 1 and novel mutations in patients with neonatal onset. Hum Mutat 2003;21:444. PMID: 12655559.

207B Kido J, Matsumoto S, Sugawara K, Sawada T, Nakamura K. Variants associated with urea cycle disorders in Japanese patients: Nationwide study and literature review. Am J Med Genet A 2021;185:2026–36. PMID: 33851512.

208 Aoshima T, Kajita M, Sekido Y, Mimura S, Itakura A, Yasuda I, et al. Carbamoyl phosphate synthetase I deficiency: molecular genetic findings and prenatal diagnosis. Prenat Diagn 2001;21:634–7. PMID: 11536261.

209 Pronicka E, Piekutowska-Abramczuk D, Ciara E, Trubicka J, Rokicki D, Karkucińska-Więckowska A, et al. New perspective in diagnostics of mitochondrial disorders: two years’ experience with whole-exome sequencing at a national paediatric centre. J Transl Med 2016;14:174. PMID: 27290639.

210 Rokicki D, Pajdowska M, Trubicka J, Thong M-K, Ciara E, Piekutowska-Abramczuk D, et al. 3-Methylglutaconic aciduria, a frequent but underrecognized finding in carbamoyl phosphate synthetase I deficiency. Clin Chim Acta 2017;471:95–100. PMID: 28526534.

211 Ali EZ, Khalid MKNM, Yunus ZM, Yakob Y, Chin CB, Abd Latif K, et al. Carbamoylphosphate synthetase 1 (CPS1) deficiency: clinical, biochemical, and molecular characterization in Malaysian patients. Eur J Pediatr 2016;175:339–46. PMID: 26440671.

212C Staretz-Chacham O, Daas S, Ulanovsky I, Blau A, Rostami N, Saraf-Levy T, et al. The role of orotic acid measurement in routine newborn screening for urea cycle disorders. J Inherit Metab Dis 2021;44:606–17. PMID: 33190319.

213 Dai D, Mei M, Hu L, Cao Y, Wang X, Wang L, et al. Prevalence of monogenic disease in paediatric patients with a predominant respiratory phenotype. Arch Dis Child 2022;107:141–7. PMID: 34134972.

214 Rapp B, Häberle J, Linnebank M, Wermuth B, Marquardt T, Harms E, et al. Genetic analysis of carbamoylphosphate synthetase I and ornithine transcarbamylase deficiency using fibroblasts. Eur J Pediatr 2001;160:283–7. PMID: 11388595.

215 Sugiyama Y, Shimura M, Ogawa-Tominaga M, Ebihara T, Kinouchi Y, Isozaki K, et al. Therapeutic effect of N-carbamylglutamate in CPS1 deficiency. Mol Genet Metab Rep 2020;24. PMID: 32670798.

216D Makris G, Lauber M, Rüfenacht V, Gemperle C, Diez-Fernandez C, Caldovic L, et al. Clinical and structural insights into potential dominant negative triggers of proximal urea cycle disorders. Biochimie 2021;183:89–99. PMID: 33309754.

217 Yan B, Wang C, Zhang K, Zhang H, Gao M, Lv Y, et al. Novel Neonatal Variants of the Carbamoyl Phosphate Synthetase 1 Deficiency: Two Case Reports and Review of Literature. Front Genet 2019;10:718. PMID: 31507628.

218E Toquet S, Spodenkiewicz M, Douillard C, Maillot F, Arnoux J-B, Damaj L, et al. Adult-onset diagnosis of urea cycle disorders: Results of a French cohort of 71 patients. J Inherit Metab Dis 2021;44:1199–214. PMID: 34014557.

219 Isler J, Rüfenacht V, Gemperle C, Allegri G, Häberle J. Improvement of diagnostic yield in carbamoylphosphate synthetase 1 (CPS1) molecular genetic investigation by RNA sequencing. JIMD Rep 2020;52:28–34. PMID: 32154057.

220 Kretz R, Hu L, Wettstein V, Leiteritz D, Häberle J. Phytohemagglutinin stimulation of lymphocytes improves mutation analysis of carbamoylphosphate synthetase 1. Mol Genet Metab 2012;106:375–8. PMID: 22575620.

221 Liu F, Bao L-S, Liang R-J, Zhao X-Y, Li Z, Du Z-F, et al. Identification of rare variants causing urea cycle disorders: A clinical, genetic, and biophysical study. J Cell Mol Med 2021;25:4099–109. PMID: 33611823.

222 Wakutani Y, Nakayasu H, Takeshima T, Adachi M, Kawataki M, Kihira K, et al. Mutational analysis of carbamoylphosphate synthetase I deficiency in three Japanese patients. J Inherit Metab Dis 2004;27:787–8. PMID: 15617192.

223 Ono H, Suto T, Kinoshita Y, Sakano T, Furue T, Ohta T. A case of carbamoyl phosphate synthetase 1 deficiency presenting symptoms at one month of age. Brain Dev 2009;31:779–81. PMID: 19167850.

224 Funghini S, Thusberg J, Spada M, Gasperini S, Parini R, Ventura L, et al. Carbamoyl phosphate synthetase 1 deficiency in Italy: clinical and genetic findings in a heterogeneous cohort. Gene 2012;493:228–34. PMID: 22173106.

225 Zhou Q, Huang H, Ma L, Zhu T. The Application of Next-Generation Sequencing (NGS) in Neonatal-Onset Urea Cycle Disorders (UCDs): Clinical Course, Metabolomic Profiling, and Genetic Findings in Nine Chinese Hyperammonemia Patients. Biomed Res Int 2020;2020:5690915. PMID: 32934962.

226 Fan L, Zhao J, Jiang L, Xie L, Ma J, Li X, et al. Molecular, biochemical, and clinical analyses of five patients with carbamoyl phosphate synthetase 1 deficiency. J Clin Lab Anal 2020;34:e23124. PMID: 31749211.

Note

CPS1-16-01 [214]: Case information at the time of initial diagnosis is available in the following reference.

214s Zimmer KP, Naim HY, Koch HG, Colombo JP, Rossi R, Schmid KW, et al. Survival after early treatment for carbamyl phosphate synthetase (CPS) I deficiency associated with increase of intramitochondrial CPS I. Lancet 1995;346:1530–1. PMID: 7491050.

3. OTC deficiency (44 refs)

301 Kim G-H, Choi J-H, Lee H-H, Park S, Kim S-S, Yoo H-W. Identification of novel mutations in the human ornithine transcarbamylase (OTC) gene of Korean patients with OTC deficiency and transient expression of the mutant proteins in vitro. Hum Mutat 2006;27:1159. PMID: 17041896.

302 Grompe M, Caskey CT, Fenwick RG. Improved molecular diagnostics for ornithine transcarbamylase deficiency. Am J Hum Genet 1991;48:212–22. PMID: 1671317.

303 Genet S, Cranston T, Middleton-Price HR. Mutation detection in 65 families with a possible diagnosis of ornithine carbamoyltransferase deficiency including 14 novel mutations. J Inherit Metab Dis 2000;23:669–76. PMID: 11117428.

304 Lindemann R, Myhre MC, Bakken M, Fugelseth D, Rustad CF, Woldseth B. [A newborn infant with hyperventilation]. Tidsskr Nor Laegeforen 2008;128:1535–6. PMID: 18604903.

305 Wilnai Y, Blumenfeld YJ, Cusmano K, Hintz SR, Alcorn D, Benitz WE, et al. Prenatal treatment of ornithine transcarbamylase deficiency. Mol Genet Metab 2018;123:297–300. PMID: 29396029.

306 Lu D, Han F, Qiu W, Zhang H, Ye J, Liang L, et al. Clinical and molecular characteristics of 69 Chinese patients with ornithine transcarbamylase deficiency. Orphanet J Rare Dis 2020;15:340. PMID: 33272297.

307 Kumar RD, Burrage LC, Bartos J, Ali S, Schmitt E, Nagamani SCS, et al. A deep intronic variant is a common cause of OTC deficiency in individuals with previously negative genetic testing. Mol Genet Metab Rep 2021;26:100706. PMID: 33489762.

308 Oppliger Leibundgut E, Liechti-Gallati S, Colombo JP, Wermuth B. Ornithine transcarbamylase deficiency: ten new mutations and high proportion of de novo mutations in heterozygous females. Hum Mutat 1997;9:409–11. PMID: 9143919.

309 Gobin-Limballe S, Ottolenghi C, Reyal F, Arnoux J-B, Magen M, Simon M, et al. OTC deficiency in females: Phenotype-genotype correlation based on a 130-family cohort. J Inherit Metab Dis 2021;44:1235–47. PMID: 34014569.

310 Feldmann D, Rozet JM, Pelet A, Hentzen D, Briand P, Hubert P, et al. Site specific screening for point mutations in ornithine transcarbamylase deficiency. J Med Genet 1992;29:471–5. PMID: 1353535.

311 McCullough BA, Yudkoff M, Batshaw ML, Wilson JM, Raper SE, Tuchman M. Genotype spectrum of ornithine transcarbamylase deficiency: correlation with the clinical and biochemical phenotype. Am J Med Genet 2000;93:313–9. PMID: 10946359.

312 Yamaguchi S, Brailey LL, Morizono H, Bale AE, Tuchman M. Mutations and polymorphisms in the human ornithine transcarbamylase (OTC) gene. Hum Mutat 2006;27:626–32. PMID: 16786505.

313 Climent C, García-Pérez MA, Sanjurjo P, Ruiz-Sanz JI, Vilaseca MA, Pineda M, et al. Identification of a cytogenetic deletion and of four novel mutations (Q69X, I172F, G188V, G197R) affecting the gene for ornithine transcarbamylase (OTC) in Spanish patients with OTC deficiency. Hum Mutat 1999;14:352–3. PMID: 10502831.

314 Arranz JA, Riudor E, Marco-Marín C, Rubio V. Estimation of the total number of disease-causing mutations in ornithine transcarbamylase (OTC) deficiency. Value of the OTC structure in predicting a mutation pathogenic potential. J Inherit Metab Dis 2007;30:217–26. PMID: 17334707.

315F Zhang W, Yang Y, Peng W, Chang J, Mei Y, Yan L, et al. A 7-Year Report of Spectrum of Inborn Errors of Metabolism on Full-Term and Premature Infants in a Chinese Neonatal Intensive Care Unit. Front Genet 2019;10:1302. PMID: 31998365.

316 Storkanova G, Vlaskova H, Chuzhanova N, Zeman J, Stranecky V, Majer F, et al. Ornithine carbamoyltransferase deficiency: molecular characterization of 29 families. Clin Genet 2013;84:552–9. PMID: 23278509.

317 Caldovic L, Abdikarim I, Narain S, Tuchman M, Morizono H. Genotype-Phenotype Correlations in Ornithine Transcarbamylase Deficiency: A Mutation Update. J Genet Genomics 2015;42:181–94. PMID: 26059767.

318A Bijarnia-Mahay S, Häberle J, Jalan AB, Puri RD, Kohli S, Kudalkar K, et al. Urea cycle disorders in India: clinical course, biochemical and genetic investigations, and prenatal testing. Orphanet J Rare Dis 2018;13:174. PMID: 30285816.

319 Yang L, Chen X, Liu X, Dong X, Ye C, Deng D, et al. Clinical features and underlying genetic causes in neonatal encephalopathy: A large cohort study. Clin Genet 2020;98:365–73. PMID: 32712949.

320 Hata A, Setoyama C, Shimada K, Takeda E, Kuroda Y, Akaboshi I, et al. Ornithine transcarbamylase deficiency resulting from a C-to-T substitution in exon 5 of the ornithine transcarbamylase gene. Am J Hum Genet 1989;45:123–7. PMID: 2741942.

321 Matsuura T, Hoshide R, Fukushima M, Sakiyama T, Owada M, Matsuda I. Prenatal monitoring of ornithine transcarbamoylase deficiency in two families by DNA analysis. J Inherit Metab Dis 1993;16:31–8. PMID: 8487501.

322 Oppliger Leibundgut EO, Wermuth B, Colombo JP, Liechti-Gallati S. Ornithine transcarbamylase deficiency: characterization of gene mutations and polymorphisms. Hum Mutat 1996;8:333–9. PMID: 8956038.

323 Mukhtar A, Dabbous H, el Sayed R, Aboulfetouh F, Bahaa M, Abdelaal A, et al. A novel mutation of the ornithine transcarbamylase gene leading to fatal hyperammonemia in a liver transplant recipient. Am J Transplant 2013;13:1084–7. PMID: 23551631.

324 Tuchman M, Plante RJ. Mutations and polymorphisms in the human ornithine transcarbamylase gene: mutation update addendum. Hum Mutat 1995;5:293–5. PMID: 7627182.

325 Kingsmore SF, Smith LD, Kunard CM, Bainbridge M, Batalov S, Benson W, Blincow E, Caylor S, Chambers C, Del Angel G, Dimmock DP, Ding Y, Ellsworth K, Feigenbaum A, Frise E, Green RC, Guidugli L, Hall KP, Hansen C, Hobbs CA, Kahn SD, Kiel M, Van Der Kraan L, Krilow C, Kwon YH, Madhavrao L, Le J, Lefebvre S, Mardach R, Mowrey WR, Oh D, Owen MJ, Powley G, Scharer G, Shelnutt S, Tokita M, Mehtalia SS, Oriol A, Papadopoulos S, Perry J, Rosales E, Sanford E, Schwartz S, Tran D, Reese MG, Wright M, Veeraraghavan N, Wigby K, Willis MJ, Wolen AR, Defay T. A genome sequencing system for universal newborn screening, diagnosis, and precision medicine for severe genetic diseases. Am J Hum Genet. 2022;109:1605-1619. PMID: 36007526.

326 Shchelochkov OA, Li F-Y, Geraghty MT, Gallagher RC, van Hove JL, Lichter-Konecki U, et al. High-frequency detection of deletions and variable rearrangements at the ornithine transcarbamylase (OTC) locus by oligonucleotide array CGH. Mol Genet Metab 2009;96:97–105. PMID: 19138872.

327 Grompe M, Muzny DM, Caskey CT. Scanning detection of mutations in human ornithine transcarbamoylase by chemical mismatch cleavage. Proc Natl Acad Sci U S A 1989;86:5888–92. PMID: 2474822.

328 Hoshide R, Matsuura T, Komaki S, Koike E, Ueno I, Matsuda I. Specificity of PCR-SSCP for detection of the mutant ornithine transcarbamylase (OTC) gene in patients with OTC deficiency. J Inherit Metab Dis 1993;16:857–62. PMID: 8295401.

329 García-Pérez MA, Paz Briones PS, García-Munñoz MJ, Rubio V. A splicing mutation, a nonsense mutation (Y167X) and two missense mutations (I159T and A209V) in Spanish patients with ornithine transcarbamylase deficiency. Hum Genet 1995;96:549–51. PMID: 8530002.

330 Shimadzu M, Matsumoto H, Matsuura T, Kobayashi K, Komaki S, Kiwaki K, et al. Ten novel mutations of the ornithine transcarbamylase (OTC) gene in OTC deficiency. Hum Mutat 1998;Suppl 1:S5-7. PMID: 9452024.

331D Makris G, Lauber M, Rüfenacht V, Gemperle C, Diez-Fernandez C, Caldovic L, et al. Clinical and structural insights into potential dominant negative triggers of proximal urea cycle disorders. Biochimie 2021;183:89–99. PMID: 33309754.

332B Kido J, Matsumoto S, Sugawara K, Sawada T, Nakamura K. Variants associated with urea cycle disorders in Japanese patients: Nationwide study and literature review. Am J Med Genet A 2021;185:2026–36. PMID: 33851512.

333 Reish O, Plante RJ, Tuchman M. Four new mutations in the ornithine transcarbamylase gene. Biochem Med Metab Biol 1993;50:169–75. PMID: 8260194.

334 Giorgi M, Morrone A, Donati MA, Ciani F, Bardelli T, Biasucci G, et al. Lymphocyte mRNA analysis of the ornithine transcarbamylase gene in Italian OTCD male patients and manifesting carriers: identification of novel mutations. Hum Mutat 2000;15:380–1. PMID: 10737985.

335 Demmer LA, Kim JM, de Martinville B, Dowton SB. A novel missense mutation in the exon containing the putative ornithine-binding domain of the OTC enzyme in a female. Hum Mutat 1996;7:279. PMID: 8829665.

336 Yoo HW, Kim GH, Lee DH. Identification of new mutations in the ornithine transcarbamylase (OTC) gene in Korean families. J Inherit Metab Dis 1996;19:31–42. PMID: 8830175.

337 Matsuda I, Tanase S. The ornithine transcarbamylase (OTC) gene: mutations in 50 Japanese families with OTC deficiency. Am J Med Genet 1997;71:378–83. PMID: 9286441.

338 Rajabi F, Rodan LH, Jonas MM, Soul JS, Ullrich NJ, Wessel A, et al. Liver Failure as the Presentation of Ornithine Transcarbamylase Deficiency in a 13-Month-Old Female. JIMD Rep 2018;40:17–22. PMID: 28887792.

339C Staretz-Chacham O, Daas S, Ulanovsky I, Blau A, Rostami N, Saraf-Levy T, et al. The role of orotic acid measurement in routine newborn screening for urea cycle disorders. J Inherit Metab Dis 2021;44:606–17. PMID: 33190319.

340 Suzuki H, Nozaki M, Yoshihashi H, Imagawa K, Kajikawa D, Yamada M, et al. Genome Analysis in Sick Neonates and Infants: High-yield Phenotypes and Contribution of Small Copy Number Variations. J Pediatr 2022;244:38-48.e1. PMID: 35131284.

341 Tuchman M, Jaleel N, Morizono H, Sheehy L, Lynch MG. Mutations and polymorphisms in the human ornithine transcarbamylase gene. Hum Mutat 2002;19:93–107. PMID: 11793468.

342 Marquetand J, Freisinger P, Lindig T, Euler S, Gasser M, Overkamp D. Ammonia and coma - a case report of late onset hemizygous ornithine carbamyltransferase deficiency in 68-year-old female. BMC Neurol 2020;20:118. PMID: 32252669.

343 Matsuura T, Hoshide R, Kiwaki K, Komaki S, Koike E, Endo F, et al. Four newly identified ornithine transcarbamylase (OTC) mutations (D126G, R129H, I172M and W332X) in Japanese male patients with early-onset OTC deficiency. Hum Mutat 1994;3:402–6. PMID: 8081398.

344E Toquet S, Spodenkiewicz M, Douillard C, Maillot F, Arnoux J-B, Damaj L, et al. Adult-onset diagnosis of urea cycle disorders: Results of a French cohort of 71 patients. J Inherit Metab Dis 2021;44:1199–214. PMID: 34014557.

4. ASS1 deficiency (12 refs)

401 Diez-Fernandez C, Rüfenacht V, Häberle J. Mutations in the Human Argininosuccinate Synthetase (ASS1) Gene, Impact on Patients, Common Changes, and Structural Considerations. Hum Mutat 2017;38:471–84. PMID: 28111830.

402 Zielonka M, Kölker S, Gleich F, Stützenberger N, Nagamani SCS, Gropman AL, et al. Early prediction of phenotypic severity in Citrullinemia Type 1. Ann Clin Transl Neurol 2019;6:1858–71. PMID: 31469252.

403B Kido J, Matsumoto S, Sugawara K, Sawada T, Nakamura K. Variants associated with urea cycle disorders in Japanese patients: Nationwide study and literature review. Am J Med Genet A 2021;185:2026–36. PMID: 33851512.

404A Bijarnia-Mahay S, Häberle J, Jalan AB, Puri RD, Kohli S, Kudalkar K, et al. Urea cycle disorders in India: clinical course, biochemical and genetic investigations, and prenatal testing. Orphanet J Rare Dis 2018;13:174. PMID: 30285816.

405 Kleijer WJ, Garritsen VH, van der Sterre MLT, Berning C, Häberle J, Huijmans JGM. Prenatal diagnosis of citrullinemia and argininosuccinic aciduria: evidence for a transmission ratio distortion in citrullinemia. Prenat Diagn 2006;26:242–7. PMID: 16475226.

406 Li CM, Chao HK, Liu YF, Su TS. A nonsense mutation is responsible for the RNA-negative phenotype in human citrullinaemia. Eur J Hum Genet 2001;9:685–9. PMID: 11571557.

407 Gao H-Z, Kobayashi K, Tabata A, Tsuge H, Iijima M, Yasuda T, et al. Identification of 16 novel mutations in the argininosuccinate synthetase gene and genotype-phenotype correlation in 38 classical citrullinemia patients. Hum Mutat 2003;22:24–34. PMID: 12815590.

408 Dimmock DP, Trapane P, Feigenbaum A, Keegan CE, Cederbaum S, Gibson J, et al. The role of molecular testing and enzyme analysis in the management of hypomorphic citrullinemia. Am J Med Genet A 2008;146A:2885–90. PMID: 18925679.

409 Miller MJ, Soler-Alfonso CR, Grund JE, Fang P, Sun Q, Elsea SH, et al. Improved standards for prenatal diagnosis of citrullinemia. Mol Genet Metab 2014;112:205–9. PMID: 24889030.

410 Ruxmohan S, Quinonez J, Choudhari J, Poudel S, Pandav K. Hyperammonemic Encephalopathy in an Adolescent Patient of Citrullinemia Type 1 With an Atypical Presentation. Cureus 2021;13:e15109. PMID: 34159013.

411 Engel K, Höhne W, Häberle J. Mutations and polymorphisms in the human argininosuccinate synthetase (ASS1) gene. Hum Mutat 2009;30:300–7. PMID: 19006241.

412 Augoustides-Savvopoulou P, Andreou A, Kobayashi K, Kleijer K, Tabata A, Papouli M, et al. Two novel mutations in a neonate with lethal “‘classical’” citrullinemia (CTLN1). J Inhert Metab Dis 2000;23:57. Not available in PubMed.

Notes

ASS1-07-01 [404]: A new mutation obtained from a fetus is included. Other prenatal diagnoses like R279X homozygotes from two families, three different compound heterozygotes with R279X, and one compound heterozygote Q380X/R363G are omitted due to a lack of clinical information.

ASS1-08-05, ASS1-12-01 [408]: Prenatal diagnosis was counted as neonatal due to the presence of family history of at least one prior child diagnosed with the classical neonatal form of citrullinemia.

ASS1-10-01, ASS1-11-01 [410]: Clinical course was classified as severe, mild, and so on. Severe clinical course is interpreted as neonatal onset.

ASS1-13-01 [411]: Course of diseased sister is presented. Prenatal genetic diagnosis of second pregnancy is not counted.

5. ASL deficiency (15 refs)

501 Zielonka M, Garbade SF, Gleich F, Okun JG, Nagamani SCS, Gropman AL, et al. From genotype to phenotype: Early prediction of disease severity in argininosuccinic aciduria. Hum Mutat 2020;41:946–60. PMID: 31943503.

502 Balmer C, Pandey AV, Rüfenacht V, Nuoffer J-M, Fang P, Wong L-J, et al. Mutations and polymorphisms in the human argininosuccinate lyase (ASL) gene. Hum Mutat 2014;35:27–35. PMID: 24166829.

503 Linnebank M, Tschiedel E, Häberle J, Linnebank A, Willenbring H, Kleijer WJ, et al. Argininosuccinate lyase (ASL) deficiency: mutation analysis in 27 patients and a completed structure of the human ASL gene. Hum Genet 2002;111:350–9. PMID: 12384776.

504 Monies D, Abouelhoda M, Assoum M, Moghrabi N, Rafiullah R, Almontashiri N, et al. Lessons Learned from Large-Scale, First-Tier Clinical Exome Sequencing in a Highly Consanguineous Population. Am J Hum Genet 2019;104:1182–201. PMID: 31130284.

505 Kim D, Ko JM, Kim Y-M, Seo GH, Kim G-H, Lee BH, et al. Low prevalence of argininosuccinate lyase deficiency among inherited urea cycle disorders in Korea. J Hum Genet 2018;63:911–7. PMID: 29773863.

506 Trevisson E, Salviati L, Baldoin MC, Toldo I, Casarin A, Sacconi S, et al. Argininosuccinate lyase deficiency: mutational spectrum in Italian patients and identification of a novel ASL pseudogene. Hum Mutat 2007;28:694–702. PMID: 17326097.

507 Trevisson E, Burlina A, Doimo M, Pertegato V, Casarin A, Cesaro L, et al. Functional complementation in yeast allows molecular characterization of missense argininosuccinate lyase mutations. J Biol Chem 2009;284:28926–34. PMID: 19703900.

508 Imtiaz F, Al-Sayed M, Trabzuni D, Al-Mubarak BR, Alsmadi O, Rashed MS, et al. Novel mutations underlying argininosuccinic aciduria in Saudi Arabia. BMC Res Notes 2010;3:79. PMID: 20298553.

509 Baruteau J, Jameson E, Morris AA, Chakrapani A, Santra S, Vijay S, et al. Expanding the phenotype in argininosuccinic aciduria: need for new therapies. J Inherit Metab Dis 2017;40:357–68. PMID: 28251416.

510F Zhang W, Yang Y, Peng W, Chang J, Mei Y, Yan L, et al. A 7-Year Report of Spectrum of Inborn Errors of Metabolism on Full-Term and Premature Infants in a Chinese Neonatal Intensive Care Unit. Front Genet 2019;10:1302. PMID: 31998365.

511A Bijarnia-Mahay S, Häberle J, Jalan AB, Puri RD, Kohli S, Kudalkar K, et al. Urea cycle disorders in India: clinical course, biochemical and genetic investigations, and prenatal testing. Orphanet J Rare Dis 2018;13:174. PMID: 30285816.

512 Zhao M, Hou L, Teng H, Li J, Wang J, Zhang K, et al. Whole-Exome Sequencing Identified a Novel Compound Heterozygous Genotype in ASL in a Chinese Han Patient with Argininosuccinate Lyase Deficiency. Biomed Res Int 2019;2019:3530198. PMID: 31183366.

513B Kido J, Matsumoto S, Sugawara K, Sawada T, Nakamura K. Variants associated with urea cycle disorders in Japanese patients: Nationwide study and literature review. Am J Med Genet A 2021;185:2026–36. PMID: 33851512.

514 Al-Sayed M, Alahmed S, Alsmadi O, Khalil H, Rashed MS, Imtiaz F, et al. Identification of a common novel mutation in Saudi patients with argininosuccinic aciduria. J Inherit Metab Dis 2005;28:877–83. PMID: 16435180.

515 Lin Y, Yu K, Li L, Zheng Z, Lin W, Fu Q. [Mutational analysis of ASS1, ASL and SLC25A13 genes in six Chinese patients with citrullinemia]. Zhonghua Yi Xue Yi Chuan Xue Za Zhi 2017;34:676–9. PMID: 28981931.

516 Barbosa P, Cialkowski M, O’Brien WE. Analysis of naturally occurring and site-directed mutations in the argininosuccinate lyase gene. J Biol Chem 1991;266:5286–90. PMID: 1705937.

Note

ASL-01-01[501]: A new mutation described in this research paper [501] is included. Already described mutations in the same paper at ASL-03 and ASL-15 are not incorporated but are commented on Dataset 2.

6.ARG1 deficiency (14 refs +1)

601 Wu T-F, Liu Y-P, Li X-Y, Wang Q, Ding Y, Ma Y-Y, et al. Five novel mutations in ARG1 gene in Chinese patients of argininemia. Pediatr Neurol 2013;49:119–23. PMID: 23859858.

602 Zhang T, Yang J, Yin X, Yu P, Mooney R, Huang X, et al. Three novel mutations of ARG1 identified in Chinese patients with argininemia detected by newborn screening. Clin Chim Acta 2017;466:68–71. PMID: 28089752.

603 Cardoso ML, Martins E, Vasconcelos R, Vilarinho L, Rocha J. Identification of a novel R21X mutation in the liver-type arginase gene (ARG1) in four Portuguese patients with argininemia. Hum Mutat 1999;14:355–6. PMID: 10502833.

604 Jain-Ghai S, Nagamani SCS, Blaser S, Siriwardena K, Feigenbaum A. Arginase I deficiency: severe infantile presentation with hyperammonemia: more common than reported? Mol Genet Metab 2011;104:107–11. PMID: 21802329.

605 Carvalho DR, Brand GD, Brum JM, Takata RI, Speck-Martins CE, Pratesi R. Analysis of novel ARG1 mutations causing hyperargininemia and correlation with arginase I activity in erythrocytes. Gene 2012;509:124–30. PMID: 22959135.

606 Rodrigues E, Martins E, Ferreira E, Vilarinho L, Leao Teles E. Argininemia patients diagnosed by newborn screening in Portugal. J Inherit Metab DIs 2014;37:S88. Not available in PubMed

607 Diez-Fernandez C, Rüfenacht V, Gemperle C, Fingerhut R, Häberle J. Mutations and common variants in the human arginase 1 (ARG1) gene: Impact on patients, diagnostics, and protein structure considerations. Hum Mutat 2018;39:1029–50. PMID: 29726057.

608 Edwards RL, Moseley K, Watanabe Y, Wong LJ, Ottina J, Yano S. Long-term neurodevelopmental effects of early detection and treatment in a 6-year-old patient with argininaemia diagnosed by newborn screening. J Inherit Metab Dis 2009;32 Suppl 1:S197-200. PMID: 19562505.

609 Uchino T, Haraguchi Y, Aparicio JM, Mizutani N, Higashikawa M, Naitoh H, et al. Three novel mutations in the liver-type arginase gene in three unrelated Japanese patients with argininemia. Am J Hum Genet 1992;51:1406–12. PMID: 1463019.

610 Amayreh W, Meyer U, Das AM. Treatment of arginase deficiency revisited: guanidinoacetate as a therapeutic target and biomarker for therapeutic monitoring. Dev Med Child Neurol 2014;56:1021–4. PMID: 24814679.

611 Yokoi K, Nakajima Y, Yasui T, Yoshino M, Yoshikawa T, Kurahashi H, et al. Novel ARG1 variants identified in a patient with arginase 1 deficiency. Hum Genome Var 2021;8:8. PMID: 33542202.

612 Grody WW, Klein D, Dodson AE, Kern RM, Wissmann PB, Goodman BK, et al. Molecular genetic study of human arginase deficiency. Am J Hum Genet 1992;50:1281–90. PMID: 1598908.

613 Scholl-Bürgi S, Sigl SB, Häberle J, Haberlandt E, Rostásy K, Ertl C, et al. Amino acids in CSF and plasma in hyperammonaemic coma due to arginase1 deficiency. J Inherit Metab Dis 2008;31 Suppl 2:S323-8. PMID: 19052914.

614 Mohseni J, Boon Hock C, Abdul Razak C, Othman SNI, Hayati F, Peitee WO, et al. Novel complex re-arrangement of ARG1 commonly shared by unrelated patients with hyperargininemia. Gene 2014;533:240–5. PMID: 24103480.

Notes

ARG1-02: Family information of cases ARG1-02-12,13,and 14 [606] and ARG1-02-15 and 16 [607] was not described in detail. These cases were regarded as being derived from different families.

ARG1-04, 05, and 06: In the following reference, ARG1-06 was used as a patient model in site-directed mutagenesis. Origins of ARG1-04, 05, and 06 mutations were not clear and, hence, not included.

612s Vockley JG, Goodman BK, Tabor DE, Kern RM, Jenkinson CP, Grody WW, et al. Loss of function mutations in conserved regions of the human arginase I gene. Biochem Mol Med 1996;59:44–51. PMID: 8902193.

7. SLC25A15/ORNT1 deficiency (8 refs)

701 Wild KT, Ganetzky RD, Yudkoff M, Ierardi-Curto L. Hyperornithinemia, Hyperammonemia, and Homocitrullinuria Syndrome Causing Severe Neonatal Hyperammonemia. JIMD Rep 2019;44:103–7. PMID: 30187369.

702 Salvi S, Santorelli FM, Bertini E, Boldrini R, Meli C, Donati A, et al. Clinical and molecular findings in hyperornithinemia-hyperammonemia-homocitrullinuria syndrome. Neurology 2001;57:911–4. PMID: 11552031.

703 Tsujino S, Kanazawa N, Ohashi T, Eto Y, Saito T, Kira J, et al. Three novel mutations (G27E, insAAC, R179X) in the ORNT1 gene of Japanese patients with hyperornithinemia, hyperammonemia, and homocitrullinuria syndrome. Ann Neurol 2000;47:625–31. PMID: 10805333.

704 Miyamoto T, Kanazawa N, Kato S, Kawakami M, Inoue Y, Kuhara T, et al. Diagnosis of Japanese patients with HHH syndrome by molecular genetic analysis: a common mutation, R179X. J Hum Genet 2001;46:260–2. PMID: 11355015.

705 Tessa A, Fiermonte G, Dionisi-Vici C, Paradies E, Baumgartner MR, Chien Y-H, et al. Identification of novel mutations in the SLC25A15 gene in hyperornithinemia-hyperammonemia-homocitrullinuria (HHH) syndrome: a clinical, molecular, and functional study. Hum Mutat 2009;30:741–8. PMID: 19242930.

706 Guan HZ, Ding Y, Li DX, Dong H, Song JQ, Jin Y, et al. [Clinical diagnosis and treatment of three cases with hyperornithinemia-hyperammonemia-homocitrullinuria syndrome]. Zhonghua Er Ke Za Zhi 2017;55:428–33. PMID: 28592010.

707 Silfverberg T, Sahlander F, Enlund M, Oscarson M, Hårdstedt M. Late onset hyperornithinemia-hyperammonemia-homocitrullinuria syndrome - how web searching by the family solved unexplained unconsciousness: a case report. J Med Case Rep 2018;12:274. PMID: 30243302.

708 Torisu H, Kira R, Kanazawa N, Takemoto M, Sanefuji M, Sakai Y, et al. A novel R275X mutation of the SLC25A15 gene in a Japanese patient with the HHH syndrome. Brain Dev 2006;28:332–5. PMID: 16376511.

8. SLC25A13/CITRIN/Citrin deficiency (25 refs +1)

801 Kobayashi K, Bang Lu Y, Xian Li M, Nishi I, Hsiao K-J, Choeh K, et al. Screening of nine SLC25A13 mutations: their frequency in patients with citrin deficiency and high carrier rates in Asian populations. Mol Genet Metab 2003;80:356–9. PMID: 14680984.

802 Tabata A, Sheng J-S, Ushikai M, Song Y-Z, Gao H-Z, Lu Y-B, et al. Identification of 13 novel mutations including a retrotransposal insertion in SLC25A13 gene and frequency of 30 mutations found in patients with citrin deficiency. J Hum Genet 2008;53:534–45. PMID: 18392553.

803 Kido J, Häberle J, Sugawara K, Tanaka T, Nagao M, Sawada T, et al. Clinical manifestation and long-term outcome of citrin deficiency: Report from a nationwide study in Japan. J Inherit Metab Dis 2022;45:431–44. PMID: 35142380.

804 Song Y-Z, Zhang Z-H, Lin W-X, Zhao X-J, Deng M, Ma Y-L, et al. SLC25A13 gene analysis in citrin deficiency: sixteen novel mutations in East Asian patients, and the mutation distribution in a large pediatric cohort in China. PLoS One 2013;8:e74544. PMID: 24069319.

805 Dimmock D, Maranda B, Dionisi-Vici C, Wang J, Kleppe S, Fiermonte G, et al. Citrin deficiency, a perplexing global disorder. Mol Genet Metab 2009;96:44–9. PMID: 19036621.

806 Fang Y, Yu J, Lou J, Peng K, Zhao H, Chen J. Clinical and Genetic Spectra of Inherited Liver Disease in Children in China. Front Pediatr 2021;9:631620. PMID: 33763395.

807 Lin W-X, Zeng H-S, Zhang Z-H, Mao M, Zheng Q-Q, Zhao S-T, et al. Molecular diagnosis of pediatric patients with citrin deficiency in China: SLC25A13 mutation spectrum and the geographic distribution. Sci Rep 2016;6:29732. PMID: 27405544.

808 Lin Y, Liu Y, Zhu L, Le K, Shen Y, Yang C, et al. Combining newborn metabolic and genetic screening for neonatal intrahepatic cholestasis caused by citrin deficiency. J Inherit Metab Dis 2020;43:467–77. PMID: 31845334.

809 Wang H, Shu S, Chen C, Huang Z, Wang D. Novel mutations in the SLC25A13 gene in a patient with NICCD and severe manifestations. J Pediatr Endocrinol Metab 2015;28:471–5. PMID: 25381944.

810 Kobayashi K, Shaheen N, Kumashiro R, Tanikawa K, O’Brien WE, Beaudet AL, et al. A search for the primary abnormality in adult-onset type II citrullinemia. Am J Hum Genet 1993;53:1024–30. PMID: 8105687.

811 Tanaka T, Nagao M, Tsutsumi H. Application of mutation analysis for the previously uncertain cases of adult-onset type II citrullinemia (CTLN2) and their clinical profiles. Tohoku J Exp Med 2002;198:89–97. PMID: 12512993.

812 Takahashi H, Kagawa T, Kobayashi K, Hirabayashi H, Yui M, Begum L, et al. A case of adult-onset type II citrullinemia--deterioration of clinical course after infusion of hyperosmotic and high sugar solutions. Med Sci Monit 2006;12:CS13-5. PMID: 16449956.

813 Togawa T, Sugiura T, Ito K, Endo T, Aoyama K, Ohashi K, et al. Molecular Genetic Dissection and Neonatal/Infantile Intrahepatic Cholestasis Using Targeted Next-Generation Sequencing. J Pediatr 2016;171:171-7.e1-4. PMID: 26858187.

814 Hirayama S, Nagasaka H, Honda A, Komatsu H, Kodama T, Inui A, et al. Cholesterol Metabolism Is Enhanced in the Liver and Brain of Children With Citrin Deficiency. J Clin Endocrinol Metab 2018;103:2488–97. PMID: 29659898.

815 Suzuki H, Kawamura Y, Kinowaki K, Akuta N, Kasuya K, Fujiyama S, et al. The Lack of Hepatocyte Steatosis in Adult-onset Type II Citrullinemia Patients as Assessed by 7-year Interval Paired Biopsies. Intern Med 2019;58:1891–5. PMID: 30799367.

816 Song Y-Z, Deng M, Chen F-P, Wen F, Guo L, Cao S-L, et al. Genotypic and phenotypic features of citrin deficiency: five-year experience in a Chinese pediatric center. Int J Mol Med 2011;28:33–40. PMID: 21424115.

817 Song Y, Sheng J, Ushikai M, Hwu W, Zhang C, Kobayashi K. [Identification and diagnosis of three novel mutations in SLC25A13 gene of neonatal intrahepatic cholestasis caused by citrin deficiency]. Zhonghua Er Ke Za Zhi 2008;46:411–5. PMID: 19099775.

818 Avdjieva-Tzavella DM, Ivanova MB, Todorov TP, Todorova AP, Panteleeva EI, Tincheva SS, et al. First Bulgarian case of citrin deficiency caused by one novel and one recurrent mutation in the SLC25A13 gene. Genet Couns 2014;25:271–6. PMID: 25365849.

819 Sheng JS, Ushikai M, Iijima M, Packman S, Weisiger K, Martin M, et al. Identification of a novel mutation in a Taiwanese patient with citrin deficiency. J Inherit Metab Dis 2006;29:163.

820 Zhou B, Zhang Q, Liu F, Zhang C, Zheng L, Wang X, et al. [Analysis of genetic variant in a child with concomitant spinal muscular atrophy and Citrin protein deficiency]. Zhonghua Yi Xue Yi Chuan Xue Za Zhi 2020;37:828–32. PMID: 32761588.

821 Hayasaka K, Numakura C, Toyota K, Kimura T. Treatment with lactose (galactose)-restricted and medium-chain triglyceride-supplemented formula for neonatal intrahepatic cholestasis caused by citrin deficiency. JIMD Rep 2012;2:37–44. PMID: 23430852.

822 Hayasaka K, Numakura C, Yamakawa M, Mitsui T, Watanabe H, Haga H, et al. Medium-chain triglycerides supplement therapy with a low-carbohydrate formula can supply energy and enhance ammonia detoxification in the hepatocytes of patients with adult-onset type II citrullinemia. J Inherit Metab Dis 2018;41:777–84. PMID: 29651749.

823 Yasuda T, Yamaguchi N, Kobayashi K, Nishi I, Horinouchi H, Jalil MA, et al. Identification of two novel mutations in the SLC25A13 gene and detection of seven mutations in 102 patients with adult-onset type II citrullinemia. Hum Genet 2000;107:537–45. PMID: 11153906.

824 Wada Y, Arai-Ichinoi N, Kikuchi A, Sakamoto O, Kure S. Hypoketotic hypoglycemia in citrin deficiency: a case report. BMC Pediatr 2020;20:444. PMID: 32962675.

825 Kang SM, Chi YH, Lee JH. An Infant Case of Citrin Deficiency with Corresponding Biochemical Features and a Heterozygous SLC25A13 Mutation. Journal of The Korean Society of Inherited Metabolic Disease 2015;15:155–9. Not available in PubMed.

Notes

Patient categorization into neonatal intrahepatic cholestasis caused by citrin deficiency (NICCD).

SLC25A13-03 [805]: From the symptoms described, namely, jaundice and progressive cholestasis, and laboratory data, three patients are categorized as having developed NICCD.

Chinese patients described as having developed liver disease accompanied with cholestasis by Lin and colleagues [808] are regarded as having NICCD.

Patient and allele counting/description.

SLC25A13-01: Alleles firmly described from patients were counted [801, 802]. The opposite allele of Pt SLC25A13-01-02, described as "[IV]/[?]" [802], can be p.Ser225*_amber, but is not counted due to the ambiguity of the description with a question mark.

In a very recent Japanese study [803], although hyperammonemia (>100 µM) was present in a total of 21 NICCD patients including those with missense and other mutations, laboratory data of specific patients are not available.

SLC25A13-02-01 [804]: c.72T>A in Table 1 is revised to c.72C>G.

SLC25A13-24: Data simply describing alleles in the following reference are not counted.

803s Yamaguchi N, Kobayashi K, Yasuda T, Nishi I, Iijima M, Nakagawa M, et al. Screening of SLC25A13 mutations in early and late onset patients with citrin deficiency and in the Japanese population: Identification of two novel mutations and establishment of multiple DNA diagnosis methods for nine mutations. Hum Mutat 2002;19:122–30. PMID: 11793471.

p.Leu399*_amber: Although the presence is listed in HGMD, this site cannot be included because mutation is not described in English.

826 Liu H, Li C, Li X, Yu C, He X, Miao J. Clinical characteristics and genetic analysis of neonatal intrahepatic cholestasis caused by citrin deficiency in comparison with idiopathic neonatal cholestasis. Zhejiang Da Xue Xue Bao Yi Xue Ban 2021;50:506–13. PMID: 34704407.
