# Supplementary material for: Human nonsense mutations in primary hyperammonemia – Analysis of publicized patient mutations and variations in general populations in eight disease-causing genes
Source: Research Square preprint supplement (doi:10.21203/rs.3.rs-3090477/v1), 2023-06-23
Supplement: Supplementary file 7 [file f31357a0cea701017bb8396b.xlsx]

## Sheet: Table
		Table S2-1. Codon frequency of the eight genes a)
amino acid	codon	8 genes			NAGS			CPS1			OTC			ASS1			ASL			ARG1			SLC25A15/ ORNT1			SLC25A13/ citrin			8 genes
		number	fraction	frequency b)	number	fraction	frequency	number	fraction	frequency	number	fraction	frequency	number	fraction	frequency	number	fraction	frequency	number	fraction	frequency	number	fraction	frequency	number	fraction	frequency	number	fraction	frequency
A_Ala	GCA	87	0.228346	19.033	1	0.0178571	1.86916	30	0.26087	19.9867	11	0.423077	30.9859	4	0.142857	9.68523	9	0.204545	19.3548	5	0.3125	15.4799	11	0.37931	36.4238	16	0.238806	23.6337	87	0.228346	19.033
A	GCC	139	0.364829	30.4091	30	0.535714	56.0748	32	0.278261	21.3191	3	0.115385	8.4507	18	0.642857	43.5835	25	0.568182	53.7634	3	0.1875	9.28793	10	0.344828	33.1126	18	0.268657	26.5879	139	0.364829	30.4091
A	GCG	29	0.0761155	6.34434	14	0.25	26.1682	3	0.026087	1.99867	2	0.0769231	5.6338	2	0.0714286	4.84262	4	0.0909091	8.60215	0	0	0	2	0.0689655	6.62252	2	0.0298507	2.95421	29	0.0761155	6.34434
A	GCT	126	0.330709	27.5651	11	0.196429	20.5607	50	0.434783	33.3111	10	0.384615	28.169	4	0.142857	9.68523	6	0.136364	12.9032	8	0.5	24.7678	6	0.206897	19.8675	31	0.462687	45.7903	126	0.330709	27.5651
C_Cys	TGC	36	0.580645	7.87574	8	0.8	14.9533	8	0.4	5.32978	1	0.333333	2.8169	4	0.8	9.68523	4	0.8	8.60215	0	0	0	7	0.777778	23.1788	4	0.571429	5.90842	36	0.580645	7.87574
C	TGT	26	0.419355	5.68803	2	0.2	3.73832	12	0.6	7.99467	2	0.666667	5.6338	1	0.2	2.42131	1	0.2	2.15054	3	1	9.28793	2	0.222222	6.62252	3	0.428571	4.43131	26	0.419355	5.68803
D_Asp	GAC	112	0.52093	24.5023	23	0.92	42.9907	28	0.373333	18.6542	5	0.294118	14.0845	10	0.625	24.2131	20	0.769231	43.0108	10	0.526316	30.9598	5	0.555556	16.5563	11	0.392857	16.2482	112	0.52093	24.5023
D	GAT	103	0.47907	22.5334	2	0.08	3.73832	47	0.626667	31.3125	12	0.705882	33.8028	6	0.375	14.5278	6	0.230769	12.9032	9	0.473684	27.8638	4	0.444444	13.245	17	0.607143	25.1108	103	0.47907	22.5334
E_Glu	GAA	128	0.467153	28.0026	1	0.0416667	1.86916	52	0.536082	34.6436	12	0.6	33.8028	10	0.285714	24.2131	5	0.166667	10.7527	15	0.789474	46.4396	6	0.6	19.8675	27	0.692308	39.8818	128	0.467153	28.0026
E	GAG	146	0.532847	31.9405	23	0.958333	42.9907	45	0.463918	29.98	8	0.4	22.5352	25	0.714286	60.5327	25	0.833333	53.7634	4	0.210526	12.3839	4	0.4	13.245	12	0.307692	17.7253	146	0.532847	31.9405
F_Phe	TTC	86	0.417476	18.8143	13	0.65	24.2991	23	0.370968	15.3231	4	0.266667	11.2676	11	0.733333	26.6344	10	0.666667	21.5054	5	0.555556	15.4799	12	0.631579	39.7351	8	0.156863	11.8168	86	0.417476	18.8143
F	TTT	120	0.582524	26.2525	7	0.35	13.0841	39	0.629032	25.9827	11	0.733333	30.9859	4	0.266667	9.68523	5	0.333333	10.7527	4	0.444444	12.3839	7	0.368421	23.1788	43	0.843137	63.5155	120	0.582524	26.2525
G_Gly	GGA	106	0.296089	23.1897	2	0.0526316	3.73832	35	0.315315	23.3178	8	0.363636	22.5352	3	0.0967742	7.26392	4	0.117647	8.60215	18	0.5	55.7276	9	0.310345	29.8013	27	0.473684	39.8818	106	0.296089	23.1897
G	GGC	108	0.301676	23.6272	25	0.657895	46.729	26	0.234234	17.3218	4	0.181818	11.2676	17	0.548387	41.1622	11	0.323529	23.6559	8	0.222222	24.7678	8	0.275862	26.4901	9	0.157895	13.2939	108	0.301676	23.6272
G	GGG	73	0.203911	15.9702	11	0.289474	20.5607	19	0.171171	12.6582	4	0.181818	11.2676	7	0.225806	16.9492	14	0.411765	30.1075	6	0.166667	18.5759	6	0.206897	19.8675	6	0.105263	8.86263	73	0.203911	15.9702
G	GGT	71	0.198324	15.5327	0	0	0	31	0.279279	20.6529	6	0.272727	16.9014	4	0.129032	9.68523	5	0.147059	10.7527	4	0.111111	12.3839	6	0.206897	19.8675	15	0.263158	22.1566	71	0.198324	15.5327
H_His	CAC	52	0.571429	11.3761	10	0.769231	18.6916	14	0.482759	9.32712	5	0.555556	14.0845	6	0.6	14.5278	8	0.727273	17.2043	5	0.625	15.4799	0	0	0	4	0.4	5.90842	52	0.571429	11.3761
H	CAT	39	0.428571	8.53205	3	0.230769	5.60748	15	0.517241	9.99334	4	0.444444	11.2676	4	0.4	9.68523	3	0.272727	6.45161	3	0.375	9.28793	1	1	3.31126	6	0.6	8.86263	39	0.428571	8.53205
I_Ile	ATA	28	0.114286	6.12557	0	0	0	10	0.10101	6.66223	2	0.125	5.6338	1	0.037037	2.42131	1	0.0555556	2.15054	4	0.173913	12.3839	3	0.214286	9.93377	7	0.212121	10.3397	28	0.114286	6.12557
I	ATC	109	0.444898	23.846	14	0.933333	26.1682	31	0.313131	20.6529	9	0.5625	25.3521	18	0.666667	43.5835	11	0.611111	23.6559	7	0.304348	21.6718	6	0.428571	19.8675	13	0.393939	19.2024	109	0.444898	23.846
I	ATT	108	0.440816	23.6272	1	0.0666667	1.86916	58	0.585859	38.6409	5	0.3125	14.0845	8	0.296296	19.3705	6	0.333333	12.9032	12	0.521739	37.1517	5	0.357143	16.5563	13	0.393939	19.2024	108	0.440816	23.6272
K_Lys	AAA	123	0.431579	26.9088	4	0.2	7.47664	49	0.471154	32.6449	15	0.576923	42.2535	11	0.333333	26.6344	6	0.3	12.9032	8	0.333333	24.7678	10	0.526316	33.1126	20	0.512821	29.5421	123	0.431579	26.9088
K	AAG	162	0.568421	35.4408	16	0.8	29.9065	55	0.528846	36.6422	11	0.423077	30.9859	22	0.666667	53.2688	14	0.7	30.1075	16	0.666667	49.5356	9	0.473684	29.8013	19	0.487179	28.065	162	0.568421	35.4408
L_Leu	CTA	38	0.0822511	8.31328	3	0.0491803	5.60748	14	0.10687	9.32712	5	0.102041	14.0845	0	0	0	2	0.0344828	4.30108	7	0.212121	21.6718	1	0.03125	3.31126	6	0.09375	8.86263	38	0.0822511	8.31328
L	CTC	83	0.179654	18.158	10	0.163934	18.6916	15	0.114504	9.99334	7	0.142857	19.7183	12	0.352941	29.0557	22	0.37931	47.3118	4	0.121212	12.3839	8	0.25	26.4901	5	0.078125	7.38552	83	0.179654	18.158
L	CTG	178	0.385281	38.9412	41	0.672131	76.6355	40	0.305344	26.6489	15	0.306122	42.2535	16	0.470588	38.7409	27	0.465517	58.0645	10	0.30303	30.9598	9	0.28125	29.8013	20	0.3125	29.5421	178	0.385281	38.9412
L	CTT	57	0.123377	12.4699	5	0.0819672	9.34579	22	0.167939	14.6569	5	0.102041	14.0845	3	0.0882353	7.26392	4	0.0689655	8.60215	5	0.151515	15.4799	4	0.125	13.245	9	0.140625	13.2939	57	0.123377	12.4699
L	TTA	36	0.0779221	7.87574	0	0	0	12	0.0916031	7.99467	5	0.102041	14.0845	1	0.0294118	2.42131	1	0.0172414	2.15054	1	0.030303	3.09598	4	0.125	13.245	12	0.1875	17.7253	36	0.0779221	7.87574
L	TTG	70	0.151515	15.3139	2	0.0327869	3.73832	28	0.21374	18.6542	12	0.244898	33.8028	2	0.0588235	4.84262	2	0.0344828	4.30108	6	0.181818	18.5759	6	0.1875	19.8675	12	0.1875	17.7253	70	0.151515	15.3139
M_Met	ATG	111	1	24.2835	8	1	14.9533	40	1	26.6489	12	1	33.8028	9	1	21.7918	15	1	32.2581	4	1	12.3839	11	1	36.4238	12	1	17.7253	111	1	24.2835
N_Asn	AAC	94	0.552941	20.5644	13	0.866667	24.2991	35	0.479452	23.3178	5	0.3125	14.0845	13	0.8125	31.477	8	0.615385	17.2043	6	0.666667	18.5759	3	0.333333	9.93377	11	0.578947	16.2482	94	0.552941	20.5644
N	AAT	76	0.447059	16.6266	2	0.133333	3.73832	38	0.520548	25.3165	11	0.6875	30.9859	3	0.1875	7.26392	5	0.384615	10.7527	3	0.333333	9.28793	6	0.666667	19.8675	8	0.421053	11.8168	76	0.447059	16.6266
P_Pro	CCA	73	0.325893	15.9702	5	0.131579	9.34579	29	0.408451	19.3205	6	0.428571	16.9014	5	0.25	12.1065	1	0.0909091	2.15054	11	0.478261	34.0557	3	0.25	9.93377	13	0.371429	19.2024	73	0.325893	15.9702
P	CCC	66	0.294643	14.4389	18	0.473684	33.6449	18	0.253521	11.992	1	0.0714286	2.8169	7	0.35	16.9492	9	0.818182	19.3548	4	0.173913	12.3839	3	0.25	9.93377	6	0.171429	8.86263	66	0.294643	14.4389
P	CCG	22	0.0982143	4.81295	11	0.289474	20.5607	4	0.056338	2.66489	1	0.0714286	2.8169	3	0.15	7.26392	1	0.0909091	2.15054	0	0	0	0	0	0	2	0.0571429	2.95421	22	0.0982143	4.81295
P	CCT	63	0.28125	13.7825	4	0.105263	7.47664	20	0.28169	13.3245	6	0.428571	16.9014	5	0.25	12.1065	0	0	0	8	0.347826	24.7678	6	0.5	19.8675	14	0.4	20.6795	63	0.28125	13.7825
Q_Gln	CAA	44	0.25	9.6259	1	0.047619	1.86916	13	0.265306	8.66089	7	0.411765	19.7183	5	0.294118	12.1065	2	0.0833333	4.30108	3	0.6	9.28793	1	0.0769231	3.31126	12	0.4	17.7253	44	0.25	9.6259
Q	CAG	132	0.75	28.8777	20	0.952381	37.3832	36	0.734694	23.984	10	0.588235	28.169	12	0.705882	29.0557	22	0.916667	47.3118	2	0.4	6.19195	12	0.923077	39.7351	18	0.6	26.5879	132	0.75	28.8777
R_Arg	AGA	41	0.18552	8.96959	1	0.025641	1.86916	16	0.280702	10.6596	5	0.333333	14.0845	0	0	0	0	0	0	7	0.538462	21.6718	3	0.25	9.93377	9	0.257143	13.2939	41	0.18552	8.96959
R	AGG	42	0.190045	9.18836	5	0.128205	9.34579	13	0.22807	8.66089	2	0.133333	5.6338	5	0.25	12.1065	5	0.166667	10.7527	3	0.230769	9.28793	2	0.166667	6.62252	7	0.2	10.3397	42	0.190045	9.18836
R	CGA	30	0.135747	6.56312	3	0.0769231	5.60748	6	0.105263	3.99734	4	0.266667	11.2676	2	0.1	4.84262	3	0.1	6.45161	2	0.153846	6.19195	2	0.166667	6.62252	8	0.228571	11.8168	30	0.135747	6.56312
R	CGC	35	0.158371	7.65697	13	0.333333	24.2991	7	0.122807	4.66356	0	0	0	6	0.3	14.5278	7	0.233333	15.0538	0	0	0	0	0	0	2	0.0571429	2.95421	35	0.158371	7.65697
R	CGG	53	0.239819	11.5948	16	0.410256	29.9065	7	0.122807	4.66356	2	0.133333	5.6338	5	0.25	12.1065	13	0.433333	27.957	1	0.0769231	3.09598	4	0.333333	13.245	5	0.142857	7.38552	53	0.239819	11.5948
R	CGT	20	0.0904977	4.37541	1	0.025641	1.86916	8	0.140351	5.32978	2	0.133333	5.6338	2	0.1	4.84262	2	0.0666667	4.30108	0	0	0	1	0.0833333	3.31126	4	0.114286	5.90842	20	0.0904977	4.37541
S_Ser	AGC	79	0.250794	17.2829	18	0.339623	33.6449	15	0.148515	9.99334	5	0.227273	14.0845	9	0.375	21.7918	16	0.444444	34.4086	5	0.25	15.4799	4	0.173913	13.245	7	0.194444	10.3397	79	0.250794	17.2829
S	AGT	40	0.126984	8.75082	5	0.0943396	9.34579	14	0.138614	9.32712	3	0.136364	8.4507	1	0.0416667	2.42131	6	0.166667	12.9032	4	0.2	12.3839	4	0.173913	13.245	3	0.0833333	4.43131	40	0.126984	8.75082
S	TCA	49	0.155556	10.7198	0	0	0	24	0.237624	15.9893	5	0.227273	14.0845	1	0.0416667	2.42131	3	0.0833333	6.45161	3	0.15	9.28793	5	0.217391	16.5563	8	0.222222	11.8168	49	0.155556	10.7198
S	TCC	75	0.238095	16.4078	17	0.320755	31.7757	23	0.227723	15.3231	4	0.181818	11.2676	10	0.416667	24.2131	5	0.138889	10.7527	3	0.15	9.28793	6	0.26087	19.8675	7	0.194444	10.3397	75	0.238095	16.4078
S	TCG	22	0.0698413	4.81295	11	0.207547	20.5607	2	0.019802	1.33245	0	0	0	1	0.0416667	2.42131	4	0.111111	8.60215	0	0	0	0	0	0	4	0.111111	5.90842	22	0.0698413	4.81295
S	TCT	50	0.15873	10.9385	2	0.0377358	3.73832	23	0.227723	15.3231	5	0.227273	14.0845	2	0.0833333	4.84262	2	0.0555556	4.30108	5	0.25	15.4799	4	0.173913	13.245	7	0.194444	10.3397	50	0.15873	10.9385
T_Thr	ACA	78	0.307087	17.0641	4	0.190476	7.47664	35	0.384615	23.3178	10	0.416667	28.169	1	0.0555556	2.42131	2	0.08	4.30108	12	0.545455	37.1517	5	0.3125	16.5563	9	0.243243	13.2939	78	0.307087	17.0641
T	ACC	84	0.330709	18.3767	10	0.47619	18.6916	24	0.263736	15.9893	6	0.25	16.9014	13	0.722222	31.477	12	0.48	25.8065	3	0.136364	9.28793	5	0.3125	16.5563	11	0.297297	16.2482	84	0.330709	18.3767
T	ACG	23	0.0905512	5.03172	5	0.238095	9.34579	5	0.0549451	3.33111	3	0.125	8.4507	1	0.0555556	2.42131	5	0.2	10.7527	0	0	0	3	0.1875	9.93377	1	0.027027	1.4771	23	0.0905512	5.03172
T	ACT	69	0.271654	15.0952	2	0.0952381	3.73832	27	0.296703	17.988	5	0.208333	14.0845	3	0.166667	7.26392	6	0.24	12.9032	7	0.318182	21.6718	3	0.1875	9.93377	16	0.432432	23.6337	69	0.271654	15.0952
V_Val	GTA	33	0.0990991	7.21943	3	0.0789474	5.60748	10	0.0819672	6.66223	4	0.266667	11.2676	0	0	0	0	0	0	3	0.12	9.28793	4	0.210526	13.245	9	0.163636	13.2939	33	0.0990991	7.21943
V	GTC	75	0.225225	16.4078	12	0.315789	22.4299	29	0.237705	19.3205	2	0.133333	5.6338	11	0.366667	26.6344	6	0.206897	12.9032	4	0.16	12.3839	2	0.105263	6.62252	9	0.163636	13.2939	75	0.225225	16.4078
V	GTG	160	0.48048	35.0033	22	0.578947	41.1215	48	0.393443	31.9787	6	0.4	16.9014	18	0.6	43.5835	21	0.724138	45.1613	16	0.64	49.5356	10	0.526316	33.1126	19	0.345455	28.065	160	0.48048	35.0033
V	GTT	65	0.195195	14.2201	1	0.0263158	1.86916	35	0.286885	23.3178	3	0.2	8.4507	1	0.0333333	2.42131	2	0.0689655	4.30108	2	0.08	6.19195	3	0.157895	9.93377	18	0.327273	26.5879	65	0.195195	14.2201
W_Trp	TGG	53	1	11.5948	11	1	20.5607	15	1	9.99334	5	1	14.0845	5	1	12.1065	10	1	21.5054	2	1	6.19195	2	1	6.62252	3	1	4.43131	53	1	11.5948
Y_Tyr	TAC	76	0.598425	16.6266	7	0.875	13.0841	22	0.578947	14.6569	4	0.363636	11.2676	12	0.631579	29.0557	8	0.8	17.2043	6	0.666667	18.5759	8	0.615385	26.4901	9	0.473684	13.2939	76	0.598425	16.6266
Y	TAT	51	0.401575	11.1573	1	0.125	1.86916	16	0.421053	10.6596	7	0.636364	19.7183	7	0.368421	16.9492	2	0.2	4.30108	3	0.333333	9.28793	5	0.384615	16.5563	10	0.526316	14.771	51	0.401575	11.1573
*_ochre	TAA	1	0.125	0.218771	0	0	0	0	0	0	0	0	0	0	0	0	0	0	0	1	1	3.09598	0	0	0	0	0	0	1	0.125	0.218771
*_amber	TAG	4	0.5	0.875082	0	0	0	1	1	0.666223	0	0	0	1	1	2.42131	1	1	2.15054	0	0	0	0	0	0	1	1	1.4771	4	0.5	0.875082
*_opal	TGA	3	0.375	0.656312	1	1	1.86916	0	0	0	1	1	2.8169	0	0	0	0	0	0	0	0	0	1	1	3.31126	0	0	0	3	0.375	0.656312
Total b)		4571		1000	535		1000	1501		1000	355		1000	413		1000	465		1000	323		1000	302		1000	677		1000	4571		1000

## Sheet: Table (2)
		Table S2. Codon frequency of the eight genes a)
amino acid	codon	Total			NAGS			CPS1			OTC			ASS1			ASL			ARG1			SLC25A15/ ORNT1			SLC25A13/ citrin			Total
		number	fraction	frequency b)	number	fraction	frequency	number	fraction	frequency	number	fraction	frequency	number	fraction	frequency	number	fraction	frequency	number	fraction	frequency	number	fraction	frequency	number	fraction	frequency	number	fraction	frequency
A_Ala	GCA	87	0.228346	19.033	1	0.0178571	1.86916	30	0.26087	19.9867	11	0.423077	30.9859	4	0.142857	9.68523	9	0.204545	19.3548	5	0.3125	15.4799	11	0.37931	36.4238	16	0.238806	23.6337	87	0.228346	19.033
A	GCC	139	0.364829	30.4091	30	0.535714	56.0748	32	0.278261	21.3191	3	0.115385	8.4507	18	0.642857	43.5835	25	0.568182	53.7634	3	0.1875	9.28793	10	0.344828	33.1126	18	0.268657	26.5879	139	0.364829	30.4091
A	GCG	29	0.0761155	6.34434	14	0.25	26.1682	3	0.026087	1.99867	2	0.0769231	5.6338	2	0.0714286	4.84262	4	0.0909091	8.60215	0	0	0	2	0.0689655	6.62252	2	0.0298507	2.95421	29	0.0761155	6.34434
A	GCT	126	0.330709	27.5651	11	0.196429	20.5607	50	0.434783	33.3111	10	0.384615	28.169	4	0.142857	9.68523	6	0.136364	12.9032	8	0.5	24.7678	6	0.206897	19.8675	31	0.462687	45.7903	126	0.330709	27.5651
C_Cys	TGC	36	0.580645	7.87574	8	0.8	14.9533	8	0.4	5.32978	1	0.333333	2.8169	4	0.8	9.68523	4	0.8	8.60215	0	0	0	7	0.777778	23.1788	4	0.571429	5.90842	36	0.580645	7.87574
C	TGT	26	0.419355	5.68803	2	0.2	3.73832	12	0.6	7.99467	2	0.666667	5.6338	1	0.2	2.42131	1	0.2	2.15054	3	1	9.28793	2	0.222222	6.62252	3	0.428571	4.43131	26	0.419355	5.68803
D_Asp	GAC	112	0.52093	24.5023	23	0.92	42.9907	28	0.373333	18.6542	5	0.294118	14.0845	10	0.625	24.2131	20	0.769231	43.0108	10	0.526316	30.9598	5	0.555556	16.5563	11	0.392857	16.2482	112	0.52093	24.5023
D	GAT	103	0.47907	22.5334	2	0.08	3.73832	47	0.626667	31.3125	12	0.705882	33.8028	6	0.375	14.5278	6	0.230769	12.9032	9	0.473684	27.8638	4	0.444444	13.245	17	0.607143	25.1108	103	0.47907	22.5334
E_Glu	GAA	128	0.467153	28.0026	1	0.0416667	1.86916	52	0.536082	34.6436	12	0.6	33.8028	10	0.285714	24.2131	5	0.166667	10.7527	15	0.789474	46.4396	6	0.6	19.8675	27	0.692308	39.8818	128	0.467153	28.0026
E	GAG	146	0.532847	31.9405	23	0.958333	42.9907	45	0.463918	29.98	8	0.4	22.5352	25	0.714286	60.5327	25	0.833333	53.7634	4	0.210526	12.3839	4	0.4	13.245	12	0.307692	17.7253	146	0.532847	31.9405
F_Phe	TTC	86	0.417476	18.8143	13	0.65	24.2991	23	0.370968	15.3231	4	0.266667	11.2676	11	0.733333	26.6344	10	0.666667	21.5054	5	0.555556	15.4799	12	0.631579	39.7351	8	0.156863	11.8168	86	0.417476	18.8143
F	TTT	120	0.582524	26.2525	7	0.35	13.0841	39	0.629032	25.9827	11	0.733333	30.9859	4	0.266667	9.68523	5	0.333333	10.7527	4	0.444444	12.3839	7	0.368421	23.1788	43	0.843137	63.5155	120	0.582524	26.2525
G_Gly	GGA	106	0.296089	23.1897	2	0.0526316	3.73832	35	0.315315	23.3178	8	0.363636	22.5352	3	0.0967742	7.26392	4	0.117647	8.60215	18	0.5	55.7276	9	0.310345	29.8013	27	0.473684	39.8818	106	0.296089	23.1897
G	GGC	108	0.301676	23.6272	25	0.657895	46.729	26	0.234234	17.3218	4	0.181818	11.2676	17	0.548387	41.1622	11	0.323529	23.6559	8	0.222222	24.7678	8	0.275862	26.4901	9	0.157895	13.2939	108	0.301676	23.6272
G	GGG	73	0.203911	15.9702	11	0.289474	20.5607	19	0.171171	12.6582	4	0.181818	11.2676	7	0.225806	16.9492	14	0.411765	30.1075	6	0.166667	18.5759	6	0.206897	19.8675	6	0.105263	8.86263	73	0.203911	15.9702
G	GGT	71	0.198324	15.5327	0	0	0	31	0.279279	20.6529	6	0.272727	16.9014	4	0.129032	9.68523	5	0.147059	10.7527	4	0.111111	12.3839	6	0.206897	19.8675	15	0.263158	22.1566	71	0.198324	15.5327
H_His	CAC	52	0.571429	11.3761	10	0.769231	18.6916	14	0.482759	9.32712	5	0.555556	14.0845	6	0.6	14.5278	8	0.727273	17.2043	5	0.625	15.4799	0	0	0	4	0.4	5.90842	52	0.571429	11.3761
H	CAT	39	0.428571	8.53205	3	0.230769	5.60748	15	0.517241	9.99334	4	0.444444	11.2676	4	0.4	9.68523	3	0.272727	6.45161	3	0.375	9.28793	1	1	3.31126	6	0.6	8.86263	39	0.428571	8.53205
I_Ile	ATA	28	0.114286	6.12557	0	0	0	10	0.10101	6.66223	2	0.125	5.6338	1	0.037037	2.42131	1	0.0555556	2.15054	4	0.173913	12.3839	3	0.214286	9.93377	7	0.212121	10.3397	28	0.114286	6.12557
I	ATC	109	0.444898	23.846	14	0.933333	26.1682	31	0.313131	20.6529	9	0.5625	25.3521	18	0.666667	43.5835	11	0.611111	23.6559	7	0.304348	21.6718	6	0.428571	19.8675	13	0.393939	19.2024	109	0.444898	23.846
I	ATT	108	0.440816	23.6272	1	0.0666667	1.86916	58	0.585859	38.6409	5	0.3125	14.0845	8	0.296296	19.3705	6	0.333333	12.9032	12	0.521739	37.1517	5	0.357143	16.5563	13	0.393939	19.2024	108	0.440816	23.6272
K_Lys	AAA	123	0.431579	26.9088	4	0.2	7.47664	49	0.471154	32.6449	15	0.576923	42.2535	11	0.333333	26.6344	6	0.3	12.9032	8	0.333333	24.7678	10	0.526316	33.1126	20	0.512821	29.5421	123	0.431579	26.9088
K	AAG	162	0.568421	35.4408	16	0.8	29.9065	55	0.528846	36.6422	11	0.423077	30.9859	22	0.666667	53.2688	14	0.7	30.1075	16	0.666667	49.5356	9	0.473684	29.8013	19	0.487179	28.065	162	0.568421	35.4408
L_Leu	CTA	38	0.0822511	8.31328	3	0.0491803	5.60748	14	0.10687	9.32712	5	0.102041	14.0845	0	0	0	2	0.0344828	4.30108	7	0.212121	21.6718	1	0.03125	3.31126	6	0.09375	8.86263	38	0.0822511	8.31328
L	CTC	83	0.179654	18.158	10	0.163934	18.6916	15	0.114504	9.99334	7	0.142857	19.7183	12	0.352941	29.0557	22	0.37931	47.3118	4	0.121212	12.3839	8	0.25	26.4901	5	0.078125	7.38552	83	0.179654	18.158
L	CTG	178	0.385281	38.9412	41	0.672131	76.6355	40	0.305344	26.6489	15	0.306122	42.2535	16	0.470588	38.7409	27	0.465517	58.0645	10	0.30303	30.9598	9	0.28125	29.8013	20	0.3125	29.5421	178	0.385281	38.9412
L	CTT	57	0.123377	12.4699	5	0.0819672	9.34579	22	0.167939	14.6569	5	0.102041	14.0845	3	0.0882353	7.26392	4	0.0689655	8.60215	5	0.151515	15.4799	4	0.125	13.245	9	0.140625	13.2939	57	0.123377	12.4699
L	TTA	36	0.0779221	7.87574	0	0	0	12	0.0916031	7.99467	5	0.102041	14.0845	1	0.0294118	2.42131	1	0.0172414	2.15054	1	0.030303	3.09598	4	0.125	13.245	12	0.1875	17.7253	36	0.0779221	7.87574
L	TTG	70	0.151515	15.3139	2	0.0327869	3.73832	28	0.21374	18.6542	12	0.244898	33.8028	2	0.0588235	4.84262	2	0.0344828	4.30108	6	0.181818	18.5759	6	0.1875	19.8675	12	0.1875	17.7253	70	0.151515	15.3139
M_Met	ATG	111	1	24.2835	8	1	14.9533	40	1	26.6489	12	1	33.8028	9	1	21.7918	15	1	32.2581	4	1	12.3839	11	1	36.4238	12	1	17.7253	111	1	24.2835
N_Asn	AAC	94	0.552941	20.5644	13	0.866667	24.2991	35	0.479452	23.3178	5	0.3125	14.0845	13	0.8125	31.477	8	0.615385	17.2043	6	0.666667	18.5759	3	0.333333	9.93377	11	0.578947	16.2482	94	0.552941	20.5644
N	AAT	76	0.447059	16.6266	2	0.133333	3.73832	38	0.520548	25.3165	11	0.6875	30.9859	3	0.1875	7.26392	5	0.384615	10.7527	3	0.333333	9.28793	6	0.666667	19.8675	8	0.421053	11.8168	76	0.447059	16.6266
P_Pro	CCA	73	0.325893	15.9702	5	0.131579	9.34579	29	0.408451	19.3205	6	0.428571	16.9014	5	0.25	12.1065	1	0.0909091	2.15054	11	0.478261	34.0557	3	0.25	9.93377	13	0.371429	19.2024	73	0.325893	15.9702
P	CCC	66	0.294643	14.4389	18	0.473684	33.6449	18	0.253521	11.992	1	0.0714286	2.8169	7	0.35	16.9492	9	0.818182	19.3548	4	0.173913	12.3839	3	0.25	9.93377	6	0.171429	8.86263	66	0.294643	14.4389
P	CCG	22	0.0982143	4.81295	11	0.289474	20.5607	4	0.056338	2.66489	1	0.0714286	2.8169	3	0.15	7.26392	1	0.0909091	2.15054	0	0	0	0	0	0	2	0.0571429	2.95421	22	0.0982143	4.81295
P	CCT	63	0.28125	13.7825	4	0.105263	7.47664	20	0.28169	13.3245	6	0.428571	16.9014	5	0.25	12.1065	0	0	0	8	0.347826	24.7678	6	0.5	19.8675	14	0.4	20.6795	63	0.28125	13.7825
Q_Gln	CAA	44	0.25	9.6259	1	0.047619	1.86916	13	0.265306	8.66089	7	0.411765	19.7183	5	0.294118	12.1065	2	0.0833333	4.30108	3	0.6	9.28793	1	0.0769231	3.31126	12	0.4	17.7253	44	0.25	9.6259
Q	CAG	132	0.75	28.8777	20	0.952381	37.3832	36	0.734694	23.984	10	0.588235	28.169	12	0.705882	29.0557	22	0.916667	47.3118	2	0.4	6.19195	12	0.923077	39.7351	18	0.6	26.5879	132	0.75	28.8777
R_Arg	AGA	41	0.18552	8.96959	1	0.025641	1.86916	16	0.280702	10.6596	5	0.333333	14.0845	0	0	0	0	0	0	7	0.538462	21.6718	3	0.25	9.93377	9	0.257143	13.2939	41	0.18552	8.96959
R	AGG	42	0.190045	9.18836	5	0.128205	9.34579	13	0.22807	8.66089	2	0.133333	5.6338	5	0.25	12.1065	5	0.166667	10.7527	3	0.230769	9.28793	2	0.166667	6.62252	7	0.2	10.3397	42	0.190045	9.18836
R	CGA	30	0.135747	6.56312	3	0.0769231	5.60748	6	0.105263	3.99734	4	0.266667	11.2676	2	0.1	4.84262	3	0.1	6.45161	2	0.153846	6.19195	2	0.166667	6.62252	8	0.228571	11.8168	30	0.135747	6.56312
R	CGC	35	0.158371	7.65697	13	0.333333	24.2991	7	0.122807	4.66356	0	0	0	6	0.3	14.5278	7	0.233333	15.0538	0	0	0	0	0	0	2	0.0571429	2.95421	35	0.158371	7.65697
R	CGG	53	0.239819	11.5948	16	0.410256	29.9065	7	0.122807	4.66356	2	0.133333	5.6338	5	0.25	12.1065	13	0.433333	27.957	1	0.0769231	3.09598	4	0.333333	13.245	5	0.142857	7.38552	53	0.239819	11.5948
R	CGT	20	0.0904977	4.37541	1	0.025641	1.86916	8	0.140351	5.32978	2	0.133333	5.6338	2	0.1	4.84262	2	0.0666667	4.30108	0	0	0	1	0.0833333	3.31126	4	0.114286	5.90842	20	0.0904977	4.37541
S_Ser	AGC	79	0.250794	17.2829	18	0.339623	33.6449	15	0.148515	9.99334	5	0.227273	14.0845	9	0.375	21.7918	16	0.444444	34.4086	5	0.25	15.4799	4	0.173913	13.245	7	0.194444	10.3397	79	0.250794	17.2829
S	AGT	40	0.126984	8.75082	5	0.0943396	9.34579	14	0.138614	9.32712	3	0.136364	8.4507	1	0.0416667	2.42131	6	0.166667	12.9032	4	0.2	12.3839	4	0.173913	13.245	3	0.0833333	4.43131	40	0.126984	8.75082
S	TCA	49	0.155556	10.7198	0	0	0	24	0.237624	15.9893	5	0.227273	14.0845	1	0.0416667	2.42131	3	0.0833333	6.45161	3	0.15	9.28793	5	0.217391	16.5563	8	0.222222	11.8168	49	0.155556	10.7198
S	TCC	75	0.238095	16.4078	17	0.320755	31.7757	23	0.227723	15.3231	4	0.181818	11.2676	10	0.416667	24.2131	5	0.138889	10.7527	3	0.15	9.28793	6	0.26087	19.8675	7	0.194444	10.3397	75	0.238095	16.4078
S	TCG	22	0.0698413	4.81295	11	0.207547	20.5607	2	0.019802	1.33245	0	0	0	1	0.0416667	2.42131	4	0.111111	8.60215	0	0	0	0	0	0	4	0.111111	5.90842	22	0.0698413	4.81295
S	TCT	50	0.15873	10.9385	2	0.0377358	3.73832	23	0.227723	15.3231	5	0.227273	14.0845	2	0.0833333	4.84262	2	0.0555556	4.30108	5	0.25	15.4799	4	0.173913	13.245	7	0.194444	10.3397	50	0.15873	10.9385
T_Thr	ACA	78	0.307087	17.0641	4	0.190476	7.47664	35	0.384615	23.3178	10	0.416667	28.169	1	0.0555556	2.42131	2	0.08	4.30108	12	0.545455	37.1517	5	0.3125	16.5563	9	0.243243	13.2939	78	0.307087	17.0641
T	ACC	84	0.330709	18.3767	10	0.47619	18.6916	24	0.263736	15.9893	6	0.25	16.9014	13	0.722222	31.477	12	0.48	25.8065	3	0.136364	9.28793	5	0.3125	16.5563	11	0.297297	16.2482	84	0.330709	18.3767
T	ACG	23	0.0905512	5.03172	5	0.238095	9.34579	5	0.0549451	3.33111	3	0.125	8.4507	1	0.0555556	2.42131	5	0.2	10.7527	0	0	0	3	0.1875	9.93377	1	0.027027	1.4771	23	0.0905512	5.03172
T	ACT	69	0.271654	15.0952	2	0.0952381	3.73832	27	0.296703	17.988	5	0.208333	14.0845	3	0.166667	7.26392	6	0.24	12.9032	7	0.318182	21.6718	3	0.1875	9.93377	16	0.432432	23.6337	69	0.271654	15.0952
V_Val	GTA	33	0.0990991	7.21943	3	0.0789474	5.60748	10	0.0819672	6.66223	4	0.266667	11.2676	0	0	0	0	0	0	3	0.12	9.28793	4	0.210526	13.245	9	0.163636	13.2939	33	0.0990991	7.21943
V	GTC	75	0.225225	16.4078	12	0.315789	22.4299	29	0.237705	19.3205	2	0.133333	5.6338	11	0.366667	26.6344	6	0.206897	12.9032	4	0.16	12.3839	2	0.105263	6.62252	9	0.163636	13.2939	75	0.225225	16.4078
V	GTG	160	0.48048	35.0033	22	0.578947	41.1215	48	0.393443	31.9787	6	0.4	16.9014	18	0.6	43.5835	21	0.724138	45.1613	16	0.64	49.5356	10	0.526316	33.1126	19	0.345455	28.065	160	0.48048	35.0033
V	GTT	65	0.195195	14.2201	1	0.0263158	1.86916	35	0.286885	23.3178	3	0.2	8.4507	1	0.0333333	2.42131	2	0.0689655	4.30108	2	0.08	6.19195	3	0.157895	9.93377	18	0.327273	26.5879	65	0.195195	14.2201
W_Trp	TGG	53	1	11.5948	11	1	20.5607	15	1	9.99334	5	1	14.0845	5	1	12.1065	10	1	21.5054	2	1	6.19195	2	1	6.62252	3	1	4.43131	53	1	11.5948
Y_Tyr	TAC	76	0.598425	16.6266	7	0.875	13.0841	22	0.578947	14.6569	4	0.363636	11.2676	12	0.631579	29.0557	8	0.8	17.2043	6	0.666667	18.5759	8	0.615385	26.4901	9	0.473684	13.2939	76	0.598425	16.6266
Y	TAT	51	0.401575	11.1573	1	0.125	1.86916	16	0.421053	10.6596	7	0.636364	19.7183	7	0.368421	16.9492	2	0.2	4.30108	3	0.333333	9.28793	5	0.384615	16.5563	10	0.526316	14.771	51	0.401575	11.1573
*_ochre	TAA	1	0.125	0.218771	0	0	0	0	0	0	0	0	0	0	0	0	0	0	0	1	1	3.09598	0	0	0	0	0	0	1	0.125	0.218771
*_amber	TAG	4	0.5	0.875082	0	0	0	1	1	0.666223	0	0	0	1	1	2.42131	1	1	2.15054	0	0	0	0	0	0	1	1	1.4771	4	0.5	0.875082
*_opal	TGA	3	0.375	0.656312	1	1	1.86916	0	0	0	1	1	2.8169	0	0	0	0	0	0	0	0	0	1	1	3.31126	0	0	0	3	0.375	0.656312
Total b)		4571		1000	535		1000	1501		1000	355		1000	413		1000	465		1000	323		1000	302		1000	677		1000	4571		1000
